# Supplementary material for: Predicting the Surface Tension of Deep Eutectic Solvents Using Artificial Neural Networks
Source: PubMed Central journal article supplement — ACS Omega. 2022 Sep 1;7(36):32194–207. doi: 10.1021/acsomega.2c03458 (PMC9475633; doi:10.1021/acsomega.2c03458), 2022-09-01
Supplement: ao2c03458_si_001.pdf [file ao2c03458_si_001.pdf]

# Supporting Information

## Predicting the Surface Tension of Deep Eutectic Solvents Using Artificial Neural Networks

Tarek Lemaoui<sup>a,1</sup>, Abir Boublia<sup>b,1</sup>, Ahmad S. Darwish<sup>c,d</sup>, Manawwer Alam<sup>e</sup>, Sungmin Park<sup>f</sup>, Byong-Hun Jeon<sup>g</sup>, Fawzi Banat<sup>c,d</sup>, Yacine Benguerba<sup>a\*</sup>, Inas M. AlNashef<sup>c,d,h</sup>

<sup>a</sup> *Laboratoire de Biopharmacie Et Pharmacotechnie (LPBT), Ferhat Abbas Setif 1 University, Setif, **Algeria***

<sup>b</sup> *Laboratoire de Physico-Chimie des Hauts Polymères (LPCHP), Département de Génie des Procédés, Faculté de Technologie, Université Ferhat ABBAS Sétif-1, Sétif, **Algeria***

<sup>c</sup> *Center for Membrane and Advanced Water Technology (CMAT), Khalifa University, Abu Dhabi, P.O. Box 127788, **United Arab Emirates (UAE)***

<sup>d</sup> *Department of Chemical Engineering, Khalifa University of Science and Technology, 127788, Abu Dhabi, **United Arab Emirates (UAE)***

<sup>e</sup> *Department of Chemistry, College of Science, King Saud University, PO Box 2455, Riyadh, 11451, **Saudi Arabia***

<sup>f</sup> *Department of Civil and Environmental Engineering, Hanyang University, 222-Wangsimni-ro, Seongdong-gu, Seoul 04763, **Republic of Korea***

<sup>g</sup> *Department of Earth Resources and Environmental Engineering, Hanyang University, Seoul 04763, **Republic of Korea***

<sup>h</sup> *Research and Innovation Center on CO<sub>2</sub> and Hydrogen (RICH Center), Khalifa University of Science and Technology, 127788, Abu Dhabi, **United Arab Emirates (UAE)***

<sup>1</sup>Shared first authorship between Tarek Lemaoui and Abir Boublia

**\*Corresponding author:**

E-mail address: [yacinebenguerba@univ-setif.dz](mailto:yacinebenguerba@univ-setif.dz) (Yacine Benguerba)

## Abbreviations

|                                                      |                                   |                           |                                |
|------------------------------------------------------|-----------------------------------|---------------------------|--------------------------------|
| <b>[1,2-ButOH]</b>                                   | 1,2-butanediol                    | <b>[Gly]</b>              | glycerol                       |
| <b>[1,3-ButOH]</b>                                   | 1,3-butanediol                    | <b>[GlyA]</b>             | glycolic acid                  |
| <b>[PDA]</b>                                         | 1,3-propanediamine                | <b>[HSO<sub>4</sub>]</b>  | hydrogen sulfate               |
| <b>[1,4-ButOH]</b>                                   | 1,4-butanediol                    | <b>[FeCl<sub>3</sub>]</b> | iron(III) chloride             |
| <b>[PenOH]</b>                                       | 1,5-pentandiol                    | <b>[IsoOH]</b>            | isopropanol                    |
| <b>[HexOH]</b>                                       | 1,6-hexanediol                    | <b>[LacA]</b>             | lactic acid                    |
| <b>[TFA]</b>                                         | 2,2,2-Trifluoroacetamide          | <b>[LevA]</b>             | levulinic acid                 |
| <b>[2,3-ButOH]</b>                                   | 2,3-butanediol                    | <b>[MalA]</b>             | malonic acid                   |
| <b>[FuA]</b>                                         | 2-furoic acid                     | <b>[Mal]</b>              | maltose                        |
| <b>[Ace]</b>                                         | acetamide                         | <b>[Mat]</b>              | matrine                        |
| <b>[AA]</b>                                          | acetic acid                       | <b>[Met]</b>              | methionine                     |
| <b>[Act]</b>                                         | acetone                           | <b>[MTP]</b>              | methyltriphenylphosphium       |
| <b>[AcCh]</b>                                        | acetylcholine                     | <b>[MEA]</b>              | monoethanolamine               |
| <b>[ATPP]</b>                                        | allyltriphenylphosphonium         | <b>[DEEA]</b>             | N,N-diethylenethanolammonium   |
| <b>[Arg]</b>                                         | arginine                          | <b>[N-DEEA]</b>           | N,N-diethylethanolammonium     |
| <b>[AspA]</b>                                        | aspartic acid                     | <b>[Nin]</b>              | ninhydrin                      |
| <b>[BenA]</b>                                        | benzilic acid                     | <b>[NMA]</b>              | N-methylacetamide              |
| <b>[BTP]</b>                                         | benzyltriphenylphosphonium        | <b>[MDEA]</b>             | n-methyldiethanolamine         |
| <b>[Bet]</b>                                         | betaine                           | <b>[MPPyr]</b>            | n-methyl-n-propylpyrrolidinium |
| <b>[N(SO<sub>2</sub>CF<sub>3</sub>)<sub>2</sub>]</b> | bis(trifluoromethylsulfonyl)imide | <b>[Oca]</b>              | octanoic acid                  |
| <b>[bor]</b>                                         | borneol                           | <b>[OA]</b>               | oxalic acid                    |
| <b>[Br]</b>                                          | bromide                           | <b>[Pae]</b>              | paeonol                        |
| <b>[BA]</b>                                          | butylammonium                     | <b>[Ph]</b>               | phenol                         |
| <b>[Cam]</b>                                         | camphor                           | <b>[PAA]</b>              | phenylacetic acid              |
| <b>[CaA]</b>                                         | capric acid                       | <b>[PEG200]</b>           | polyethylene glycol 200        |
| <b>[CapA]</b>                                        | caprylic acid                     | <b>[PEG400]</b>           | polyethylene glycol 400        |
| <b>[Cl]</b>                                          | chloride                          | <b>[PA]</b>               | propionic acid                 |
| <b>[Ch]</b>                                          | choline                           | <b>[PA]</b>               | propylammonium                 |
| <b>[CA]</b>                                          | citric acid                       | <b>[TBA]</b>              | tetrabutylammonium             |
| <b>[ManA]</b>                                        | D-(+)-mandelic acid               | <b>[TEA]</b>              | tetraethylammonium             |
| <b>[DEG]</b>                                         | diethylene glycol                 | <b>[TPA]</b>              | tetrapropylammonium            |
| <b>[DGA]</b>                                         | diglycolic acid                   | <b>[ThU]</b>              | thiourea                       |
| <b>[Men]</b>                                         | DL-menthol                        | <b>[Thy]</b>              | thymol                         |
| <b>[Eth]</b>                                         | ethanol                           | <b>[TEG]</b>              | triethylene glycol             |
| <b>[EtAc]</b>                                        | ethyl acetate                     | <b>[TEG]</b>              | triethylene glycol             |
| <b>[EA]</b>                                          | ethylammonium                     | <b>[TMG]</b>              | trimethyl glycine              |
| <b>[EG]</b>                                          | ethylene glycol                   | <b>[U]</b>                | urea                           |
| <b>[FA]</b>                                          | formic acid                       | <b>[H<sub>2</sub>O]</b>   | water                          |
| <b>[Fru]</b>                                         | fructose                          | <b>[Xyl]</b>              | xylitol                        |
| <b>[Glu]</b>                                         | glucose                           | <b>[ZnCl<sub>2</sub>]</b> | zinc chloride                  |
| <b>[GluA]</b>                                        | glutamic acid                     |                           |                                |

**Table S.1.** The 1571 experimental surface tension data of the DESs used in this work.

| T/ K                                                                           | $\gamma/\text{mN.m}^{-1}$ | Uncer. ( $\pm$ ) | Ref. | T/ K                                                                          | $\gamma/\text{mN.m}^{-1}$ | Uncer. ( $\pm$ ) | Ref. |
|--------------------------------------------------------------------------------|---------------------------|------------------|------|-------------------------------------------------------------------------------|---------------------------|------------------|------|
| <b>DES1</b> - [AcCh][Cl]:U (1:2)<br>$x_1=0.333, x_2=0.667, x_3=0.000$          |                           |                  |      | <b>DES2.1</b> - [ATPP][Br]:DEG (1:10)<br>$x_1=0.091, x_2=0.909, x_3=0.000$    |                           |                  |      |
| 313.15                                                                         | 65.1                      | -                | 1    | 298.15                                                                        | 46.34                     | 0.03             |      |
|                                                                                |                           |                  |      | 303.15                                                                        | 45.72                     | 0.03             |      |
|                                                                                |                           |                  |      | 308.15                                                                        | 45.13                     | 0.03             |      |
|                                                                                |                           |                  |      | 313.15                                                                        | 44.53                     | 0.03             |      |
|                                                                                |                           |                  |      | 318.15                                                                        | 43.96                     | 0.03             | 2    |
|                                                                                |                           |                  |      | 323.15                                                                        | 43.28                     | 0.03             |      |
|                                                                                |                           |                  |      | 328.15                                                                        | 42.71                     | 0.03             |      |
|                                                                                |                           |                  |      | 333.15                                                                        | 42.10                     | 0.03             |      |
|                                                                                |                           |                  |      | 338.15                                                                        | 41.46                     | 0.03             |      |
|                                                                                |                           |                  |      | 343.15                                                                        | 40.86                     | 0.03             |      |
| <b>DES2.2</b> - [ATPP][Br]:DEG (1:4)<br>$x_1=0.200, x_2=0.500, x_3=0.000$      |                           |                  |      | <b>DES3.1</b> - [ATPP][Br]:TEG (1:16)<br>$x_1=0.059, x_2=0.941, x_3=0.000$    |                           |                  |      |
| 298.15                                                                         | 49.37                     | 0.03             |      | 303.15                                                                        | 47.68                     | 0.03             |      |
| 303.15                                                                         | 48.87                     | 0.03             |      | 328.15                                                                        | 44.35                     | 0.03             |      |
| 308.15                                                                         | 48.35                     | 0.03             |      | 298.15                                                                        | 48.25                     | 0.03             |      |
| 313.15                                                                         | 47.83                     | 0.03             |      | 308.15                                                                        | 47.01                     | 0.03             |      |
| 318.15                                                                         | 47.33                     | 0.03             |      | 313.15                                                                        | 46.39                     | 0.03             |      |
| 323.15                                                                         | 46.82                     | 0.03             |      | 318.15                                                                        | 45.72                     | 0.03             |      |
| 328.15                                                                         | 46.35                     | 0.03             |      | 323.15                                                                        | 44.99                     | 0.03             |      |
| 333.15                                                                         | 45.86                     | 0.03             |      | 333.15                                                                        | 43.62                     | 0.03             |      |
| 338.15                                                                         | 45.36                     | 0.03             |      | 338.15                                                                        | 43.00                     | 0.03             |      |
| 343.15                                                                         | 44.90                     | 0.03             | 2    | 343.15                                                                        | 42.38                     | 0.03             | 3    |
| 298.15                                                                         | 47.38                     | 0.03             |      | 298.15                                                                        | 45.37                     | 0.03             |      |
| 303.15                                                                         | 46.88                     | 0.03             |      | 303.15                                                                        | 44.69                     | 0.03             |      |
| 308.15                                                                         | 46.33                     | 0.03             |      | 308.15                                                                        | 44.12                     | 0.03             |      |
| 313.15                                                                         | 45.82                     | 0.03             |      | 313.15                                                                        | 43.55                     | 0.03             |      |
| 318.15                                                                         | 45.33                     | 0.03             |      | 318.15                                                                        | 42.91                     | 0.03             |      |
| 323.15                                                                         | 44.80                     | 0.03             |      | 323.15                                                                        | 42.33                     | 0.03             |      |
| 328.15                                                                         | 44.30                     | 0.03             |      | 328.15                                                                        | 41.82                     | 0.03             |      |
| 333.15                                                                         | 43.85                     | 0.03             |      | 333.15                                                                        | 41.17                     | 0.03             |      |
| 338.15                                                                         | 43.36                     | 0.03             |      | 338.15                                                                        | 40.55                     | 0.03             |      |
| 343.15                                                                         | 42.89                     | 0.03             |      | 343.15                                                                        | 40.11                     | 0.03             |      |
| <b>DES3.2</b> - [ATPP][Br]:TEG (1:10)<br>$x_1=0.091, x_2=0.909, x_3=0.000$     |                           |                  |      | <b>DES4</b> - [BA][Br]:Gly (1:2)<br>$x_1=0.333, x_2=0.667, x_3=0.000$         |                           |                  |      |
| 298.15                                                                         | 46.21                     | 0.03             |      |                                                                               |                           |                  |      |
| 303.15                                                                         | 45.66                     | 0.03             |      |                                                                               |                           |                  |      |
| 308.15                                                                         | 45.01                     | 0.03             |      |                                                                               |                           |                  |      |
| 313.15                                                                         | 44.33                     | 0.03             |      |                                                                               |                           |                  |      |
| 318.15                                                                         | 43.66                     | 0.03             | 3    | 298.15                                                                        | 44.9                      | -                | 4    |
| 323.15                                                                         | 42.96                     | 0.03             |      |                                                                               |                           |                  |      |
| 328.15                                                                         | 42.27                     | 0.03             |      |                                                                               |                           |                  |      |
| 333.15                                                                         | 41.62                     | 0.03             |      |                                                                               |                           |                  |      |
| 338.15                                                                         | 41.11                     | 0.03             |      |                                                                               |                           |                  |      |
| 343.15                                                                         | 40.58                     | 0.03             |      |                                                                               |                           |                  |      |
| <b>DES5</b> - [BTP][Cl]:DEG (1:7)<br>$x_1=0.125, x_2=0.875, x_3=0.000$         |                           |                  |      | <b>DES6</b> - [BTP][Cl]:EG (1:11)<br>$x_1=0.250, x_2=0.750, x_3=0.000$        |                           |                  |      |
| 293.00                                                                         | 66.68                     | 0.10             |      |                                                                               |                           |                  |      |
| 303.00                                                                         | 65.24                     | 0.10             |      |                                                                               |                           |                  |      |
| 313.00                                                                         | 61.01                     | 0.10             |      |                                                                               |                           |                  |      |
| 323.00                                                                         | 57.05                     | 0.10             | 5    | 298.15                                                                        | 66.93                     | 0.10             | 6    |
| 333.00                                                                         | 46.37                     | 0.10             |      |                                                                               |                           |                  |      |
| 343.00                                                                         | 38.58                     | 0.10             |      |                                                                               |                           |                  |      |
| 353.00                                                                         | 32.71                     | 0.10             |      |                                                                               |                           |                  |      |
| <b>DES7.1</b> - [Ch][Cl]:1,2-ButOH (1:19)<br>$x_1=0.050, x_2=0.950, x_3=0.000$ |                           |                  |      | <b>DES7.2</b> - [Ch][Cl]:1,2-ButOH (1:9)<br>$x_1=0.100, x_2=0.900, x_3=0.000$ |                           |                  |      |
|                                                                                | 32.90                     |                  |      |                                                                               |                           |                  |      |
| 293.00                                                                         | 32.80                     | -                |      | 293.00                                                                        | 33.70                     | -                |      |
| 295.00                                                                         | 32.50                     | -                |      | 295.00                                                                        | 33.40                     | -                |      |
| 297.00                                                                         | 32.30                     | -                |      | 297.00                                                                        | 33.20                     | -                |      |
| 299.00                                                                         | 32.10                     | -                |      | 299.00                                                                        | 33.00                     | -                |      |
| 301.00                                                                         | 31.90                     | -                |      | 301.00                                                                        | 32.80                     | -                | 7    |
| 303.00                                                                         | 31.70                     | -                | 7    | 303.00                                                                        | 32.60                     | -                |      |
| 305.00                                                                         | 31.60                     | -                |      | 305.00                                                                        | 32.20                     | -                |      |
| 307.00                                                                         | 31.30                     | -                |      | 307.00                                                                        | 32.00                     | -                |      |
| 309.00                                                                         | 31.10                     | -                |      | 309.00                                                                        | 31.90                     | -                |      |
| 311.00                                                                         |                           | -                |      | 311.00                                                                        | 31.70                     | -                |      |

|                                                                                  |       |   |                                                                                 |       |   |
|----------------------------------------------------------------------------------|-------|---|---------------------------------------------------------------------------------|-------|---|
| <b>DES7.3</b> - [Ch][Cl]:1,2-ButOH (1:5.67)<br>$x_1=0.150, x_2=0.850, x_3=0.000$ |       |   | <b>DES7.4</b> - [Ch][Cl]:1,2-ButOH (1:4)<br>$x_1=0.200, x_2=0.800, x_3=0.000$   |       |   |
| 293.00                                                                           | 34.20 | - | 293.00                                                                          | 34.70 | - |
| 295.00                                                                           | 33.90 | - | 295.00                                                                          | 34.50 | - |
| 297.00                                                                           | 33.70 | - | 297.00                                                                          | 34.30 | - |
| 299.00                                                                           | 33.40 | - | 299.00                                                                          | 34.20 | - |
| 301.00                                                                           | 33.30 | - | 301.00                                                                          | 34.10 | - |
| 303.00                                                                           | 33.20 | - | 303.00                                                                          | 33.90 | - |
| 305.00                                                                           | 33.10 | - | 305.00                                                                          | 33.70 | - |
| 307.00                                                                           | 33.00 | - | 307.00                                                                          | 33.50 | - |
| 309.00                                                                           | 32.90 | - | 309.00                                                                          | 33.40 | - |
| 311.00                                                                           | 32.60 | - | 311.00                                                                          | 33.20 | - |
| <b>DES8.1</b> - [Ch][Cl]:1,3-ButOH (1:19)<br>$x_1=0.050, x_2=0.950, x_3=0.000$   |       |   | <b>DES8.2</b> - [Ch][Cl]:1,3-ButOH (1:19)<br>$x_1=0.100, x_2=0.900, x_3=0.000$  |       |   |
| 293.00                                                                           | 34.40 | - | 293.00                                                                          | 38.20 | - |
| 295.00                                                                           | 34.20 | - | 295.00                                                                          | 37.90 | - |
| 297.00                                                                           | 34.00 | - | 297.00                                                                          | 37.80 | - |
| 299.00                                                                           | 33.90 | - | 299.00                                                                          | 37.50 | - |
| 301.00                                                                           | 33.70 | - | 301.00                                                                          | 37.50 | - |
| 303.00                                                                           | 33.40 | - | 303.00                                                                          | 36.90 | - |
| 305.00                                                                           | 33.00 | - | 305.00                                                                          | 36.50 | - |
| 307.00                                                                           | 32.60 | - | 307.00                                                                          | 36.20 | - |
| 309.00                                                                           | 32.30 | - | 309.00                                                                          | 35.90 | - |
| 311.00                                                                           | 31.90 | - | 311.00                                                                          | 35.70 | - |
| <b>DES8.3</b> - [Ch][Cl]:1,3-ButOH (1:5.67)<br>$x_1=0.150, x_2=0.850, x_3=0.000$ |       |   | <b>DES8.4</b> - [Ch][Cl]:1,3-ButOH (1:4)<br>$x_1=0.200, x_2=0.800, x_3=0.000$   |       |   |
| 293.00                                                                           | 39.00 | - | 293.00                                                                          | 40.10 | - |
| 295.00                                                                           | 38.90 | - | 295.00                                                                          | 39.80 | - |
| 297.00                                                                           | 38.60 | - | 297.00                                                                          | 39.60 | - |
| 299.00                                                                           | 38.30 | - | 299.00                                                                          | 39.60 | - |
| 301.00                                                                           | 38.30 | - | 301.00                                                                          | 39.20 | - |
| 303.00                                                                           | 38.20 | - | 303.00                                                                          | 39.20 | - |
| 305.00                                                                           | 38.00 | - | 305.00                                                                          | 38.90 | - |
| 307.00                                                                           | 37.60 | - | 307.00                                                                          | 38.50 | - |
| 309.00                                                                           | 37.20 | - | 309.00                                                                          | 38.30 | - |
| 311.00                                                                           | 36.90 | - | 311.00                                                                          | 38.10 | - |
| <b>DES9.1</b> - [Ch][Cl]:1,4-ButOH (1:19)<br>$x_1=0.050, x_2=0.950, x_3=0.000$   |       |   | <b>DES9.2</b> - [Ch][Cl]:1,4-ButOH (1:9)<br>$x_1=0.100, x_2=0.900, x_3=0.000$   |       |   |
| 293.00                                                                           | 46.40 | - | 293.00                                                                          | 46.80 | - |
| 295.00                                                                           | 46.30 | - | 295.00                                                                          | 46.70 | - |
| 297.00                                                                           | 46.10 | - | 297.00                                                                          | 46.60 | - |
| 299.00                                                                           | 46.00 | - | 299.00                                                                          | 46.40 | - |
| 301.00                                                                           | 45.90 | - | 301.00                                                                          | 46.30 | - |
| 303.00                                                                           | 45.80 | - | 303.00                                                                          | 46.30 | - |
| 305.00                                                                           | 45.70 | - | 305.00                                                                          | 46.20 | - |
| 307.00                                                                           | 45.60 | - | 307.00                                                                          | 46.10 | - |
| 309.00                                                                           | 45.40 | - | 309.00                                                                          | 46.00 | - |
| 311.00                                                                           | 45.30 | - | 311.00                                                                          | 45.80 | - |
| <b>DES9.3</b> - [Ch][Cl]:1,4-ButOH (1:5.67)<br>$x_1=0.150, x_2=0.850, x_3=0.000$ |       |   | <b>DES9.4</b> - [Ch][Cl]:1,4-ButOH (1:4)<br>$x_1=0.200, x_2=0.800, x_3=0.000$   |       |   |
| 293.00                                                                           | 46.90 | - | 293.00                                                                          | 47.40 | - |
| 295.00                                                                           | 46.80 | - | 295.00                                                                          | 47.30 | - |
| 297.00                                                                           | 46.80 | - | 297.00                                                                          | 47.10 | - |
| 299.00                                                                           | 46.70 | - | 299.00                                                                          | 47.00 | - |
| 301.00                                                                           | 46.50 | - | 301.00                                                                          | 46.90 | - |
| 303.00                                                                           | 46.40 | - | 303.00                                                                          | 46.80 | - |
| 305.00                                                                           | 46.30 | - | 305.00                                                                          | 46.60 | - |
| 307.00                                                                           | 46.10 | - | 307.00                                                                          | 46.60 | - |
| 309.00                                                                           | 46.00 | - | 309.00                                                                          | 46.30 | - |
| 311.00                                                                           | 46.00 | - | 311.00                                                                          | 46.20 | - |
| <b>DES9.5</b> - [Ch][Cl]:1,4-ButOH (1:3)<br>$x_1=0.250, x_2=0.750, x_3=0.000$    |       |   | <b>DES10.1</b> - [Ch][Cl]:2,3-ButOH (1:19)<br>$x_1=0.050, x_2=0.950, x_3=0.000$ |       |   |
| 293.00                                                                           | 47.60 | - | 293.00                                                                          | 34.20 | - |
| 295.00                                                                           | 47.50 | - | 295.00                                                                          | 34.00 | - |
| 297.00                                                                           | 47.40 | - | 297.00                                                                          | 33.70 | - |
| 299.00                                                                           | 47.40 | - | 299.00                                                                          | 33.70 | - |
| 301.00                                                                           | 47.30 | - | 301.00                                                                          | 33.50 | - |
| 303.00                                                                           | 47.30 | - | 303.00                                                                          | 33.20 | - |
| 305.00                                                                           | 47.20 | - | 305.00                                                                          | 33.00 | - |
| 307.00                                                                           | 47.10 | - | 307.00                                                                          | 32.90 | - |
| 309.00                                                                           | 47.10 | - | 309.00                                                                          | 32.60 | - |
| 311.00                                                                           | 47.00 | - | 311.00                                                                          | 32.30 | - |

|                                                                                               |       |      |    |                                                                                                  |       |      |    |
|-----------------------------------------------------------------------------------------------|-------|------|----|--------------------------------------------------------------------------------------------------|-------|------|----|
| <b>DES10.2</b> - [Ch][Cl]:2,3-ButOH (1:9)<br>$x_1=0.100, x_2=0.900, x_3=0.000$                |       |      |    | <b>DES10.3</b> - [Ch][Cl]:2,3-ButOH (1:5.67)<br>$x_1=0.150, x_2=0.850, x_3=0.000$                |       |      |    |
| 293.00                                                                                        | 34.50 | -    |    | 293.00                                                                                           | 35.10 | -    |    |
| 295.00                                                                                        | 34.30 | -    |    | 295.00                                                                                           | 34.90 | -    |    |
| 297.00                                                                                        | 34.10 | -    |    | 297.00                                                                                           | 34.60 | -    |    |
| 299.00                                                                                        | 33.90 | -    |    | 299.00                                                                                           | 34.40 | -    |    |
| 301.00                                                                                        | 33.40 | -    | 7  | 301.00                                                                                           | 34.20 | -    | 7  |
| 303.00                                                                                        | 33.30 | -    |    | 303.00                                                                                           | 34.00 | -    |    |
| 305.00                                                                                        | 33.20 | -    |    | 305.00                                                                                           | 33.70 | -    |    |
| 307.00                                                                                        | 33.10 | -    |    | 307.00                                                                                           | 33.50 | -    |    |
| 309.00                                                                                        | 32.80 | -    |    | 309.00                                                                                           | 33.30 | -    |    |
| 311.00                                                                                        | 32.80 | -    |    | 311.00                                                                                           | 33.00 | -    |    |
| <b>DES10.4</b> - [Ch][Cl]:2,3-ButOH (1:4)<br>$x_1=0.200, x_2=0.800, x_3=0.000$                |       |      |    | <b>DES11</b> - [Ch][Cl]:BenA (1:1)<br>$x_1=0.500, x_2=0.500, x_3=0.000$                          |       |      |    |
| 293.00                                                                                        | 35.60 | -    |    |                                                                                                  |       |      |    |
| 295.00                                                                                        | 35.40 | -    |    |                                                                                                  |       |      |    |
| 297.00                                                                                        | 34.90 | -    |    | 333.15                                                                                           | 51.53 | 0.20 |    |
| 299.00                                                                                        | 34.70 | -    |    | 338.15                                                                                           | 50.32 | 0.20 |    |
| 301.00                                                                                        | 34.70 | -    | 7  | 343.15                                                                                           | 49.10 | 0.20 | 8  |
| 303.00                                                                                        | 34.50 | -    |    | 348.15                                                                                           | 48.01 | 0.20 |    |
| 305.00                                                                                        | 34.30 | -    |    | 353.15                                                                                           | 46.90 | 0.20 |    |
| 307.00                                                                                        | 34.00 | -    |    |                                                                                                  |       |      |    |
| 309.00                                                                                        | 33.70 | -    |    |                                                                                                  |       |      |    |
| 311.00                                                                                        | 33.50 | -    |    |                                                                                                  |       |      |    |
| <b>DES12.1</b> - [Ch][Cl]:CA:H <sub>2</sub> O (1:2:10.5)<br>$x_1=0.074, x_2=0.149, x_3=0.777$ |       |      |    | <b>DES12.2</b> - [Ch][Cl]:CA:H <sub>2</sub> O (1.01:1:6.05)<br>$x_1=0.125, x_2=0.124, x_3=0.751$ |       |      |    |
|                                                                                               |       |      |    | 278.15                                                                                           | 70.49 | 0.01 |    |
|                                                                                               |       |      |    | 280.65                                                                                           | 70.30 | 0.01 |    |
|                                                                                               |       |      |    | 283.15                                                                                           | 70.00 | 0.01 |    |
|                                                                                               |       |      |    | 285.65                                                                                           | 69.86 | 0.01 |    |
|                                                                                               |       |      |    | 288.15                                                                                           | 69.59 | 0.01 |    |
|                                                                                               |       |      |    | 290.65                                                                                           | 69.33 | 0.01 |    |
|                                                                                               |       |      |    | 293.15                                                                                           | 69.14 | 0.01 |    |
|                                                                                               |       |      |    | 295.65                                                                                           | 68.76 | 0.01 |    |
|                                                                                               |       |      |    | 298.15                                                                                           | 68.59 | 0.01 |    |
|                                                                                               |       |      |    | 300.65                                                                                           | 68.34 | 0.01 |    |
|                                                                                               |       |      |    | 303.15                                                                                           | 68.18 | 0.01 |    |
| 313.15                                                                                        | 60.35 | 0.27 | 9  | 305.65                                                                                           | 67.90 | 0.01 |    |
| 333.15                                                                                        | 46.72 | 0.06 |    | 308.15                                                                                           | 67.60 | 0.01 | 10 |
|                                                                                               |       |      |    | 310.65                                                                                           | 67.26 | 0.01 |    |
|                                                                                               |       |      |    | 313.15                                                                                           | 67.14 | 0.01 |    |
|                                                                                               |       |      |    | 315.65                                                                                           | 66.88 | 0.01 |    |
|                                                                                               |       |      |    | 318.15                                                                                           | 66.60 | 0.01 |    |
|                                                                                               |       |      |    | 320.65                                                                                           | 66.28 | 0.01 |    |
|                                                                                               |       |      |    | 323.15                                                                                           | 65.96 | 0.01 |    |
|                                                                                               |       |      |    | 325.65                                                                                           | 65.70 | 0.01 |    |
|                                                                                               |       |      |    | 328.15                                                                                           | 65.48 | 0.01 |    |
|                                                                                               |       |      |    | 330.65                                                                                           | 65.22 | 0.01 |    |
|                                                                                               |       |      |    | 333.15                                                                                           | 65.08 | 0.01 |    |
|                                                                                               |       |      |    | 335.65                                                                                           | 64.93 | 0.01 |    |
|                                                                                               |       |      |    | 338.15                                                                                           | 64.80 | 0.01 |    |
| <b>DES13</b> - [Ch][Cl]:CA (1:2)<br>$x_1=0.333, x_2=0.667, x_3=0.000$                         |       |      |    | <b>DES14</b> - [Ch][Cl]:DEG (1:2)<br>$x_1=0.333, x_2=0.667, x_3=0.000$                           |       |      |    |
|                                                                                               |       |      |    | 293.00                                                                                           | 48.40 | 0.10 |    |
|                                                                                               |       |      |    | 303.00                                                                                           | 44.44 | 0.10 |    |
| 313.15                                                                                        | 60.35 | 0.27 | 11 | 313.00                                                                                           | 42.81 | 0.10 |    |
|                                                                                               |       |      |    | 323.00                                                                                           | 41.85 | 0.10 | 5  |
|                                                                                               |       |      |    | 333.00                                                                                           | 38.20 | 0.10 |    |
|                                                                                               |       |      |    | 343.00                                                                                           | 36.47 | 0.10 |    |
|                                                                                               |       |      |    | 353.00                                                                                           | 34.16 | 0.10 |    |
| <b>DES15</b> - [Ch][Cl]:DGA (1:1)<br>$x_1=0.500, x_2=0.500, x_3=0.000$                        |       |      |    | <b>DES16</b> - [Ch][Cl]:EG:H <sub>2</sub> O (1:1.98:0.95)<br>$x_1=0.254, x_2=0.504, x_3=0.242$   |       |      |    |
|                                                                                               |       |      |    | 278.15                                                                                           | 56.90 | 0.20 |    |
|                                                                                               |       |      |    | 280.65                                                                                           | 56.80 | 0.20 |    |
| 303.15                                                                                        | 67.69 | 0.10 |    | 283.15                                                                                           | 56.70 | 0.20 |    |
| 313.15                                                                                        | 65.18 | 0.10 |    | 285.65                                                                                           | 56.60 | 0.20 |    |
| 323.15                                                                                        | 63.00 | 0.10 | 12 | 288.15                                                                                           | 56.50 | 0.20 | 13 |
| 333.15                                                                                        | 60.73 | 0.10 |    | 290.65                                                                                           | 56.35 | 0.20 |    |
| 343.15                                                                                        | 58.30 | 0.10 |    | 293.15                                                                                           | 56.25 | 0.20 |    |
|                                                                                               |       |      |    | 295.65                                                                                           | 56.10 | 0.20 |    |
|                                                                                               |       |      |    | 298.15                                                                                           | 56.00 | 0.20 |    |
|                                                                                               |       |      |    | 300.65                                                                                           | 55.90 | 0.20 |    |

|                                                                            |       |      |    |                                                                            |       |      |    |
|----------------------------------------------------------------------------|-------|------|----|----------------------------------------------------------------------------|-------|------|----|
|                                                                            |       |      |    | 303.15                                                                     | 55.80 | 0.20 |    |
|                                                                            |       |      |    | 305.65                                                                     | 55.65 | 0.20 |    |
|                                                                            |       |      |    | 308.15                                                                     | 55.50 | 0.20 |    |
|                                                                            |       |      |    | 310.65                                                                     | 55.45 | 0.20 |    |
|                                                                            |       |      |    | 313.15                                                                     | 55.30 | 0.20 |    |
|                                                                            |       |      |    | 315.65                                                                     | 55.20 | 0.20 |    |
|                                                                            |       |      |    | 318.15                                                                     | 55.10 | 0.20 |    |
|                                                                            |       |      |    | 320.65                                                                     | 55.00 | 0.20 |    |
|                                                                            |       |      |    | 323.15                                                                     | 54.85 | 0.20 |    |
|                                                                            |       |      |    | 325.65                                                                     | 54.75 | 0.20 |    |
|                                                                            |       |      |    | 328.15                                                                     | 54.60 | 0.20 |    |
|                                                                            |       |      |    | 330.65                                                                     | 54.50 | 0.20 |    |
|                                                                            |       |      |    | 333.15                                                                     | 54.40 | 0.20 |    |
|                                                                            |       |      |    | 335.65                                                                     | 54.30 | 0.20 |    |
|                                                                            |       |      |    | 338.15                                                                     | 54.15 | 0.20 |    |
| <b>DES17.1 - [Ch][Cl]:EG (1:19)</b><br>$x_1=0.050, x_2=0.950, x_3=0.000$   |       |      |    | <b>DES17.2 - [Ch][Cl]:EG (1:9)</b><br>$x_1=0.100, x_2=0.900, x_3=0.000$    |       |      |    |
| 277.00                                                                     | 48.00 | -    |    | 277.00                                                                     | 49.50 | -    |    |
| 279.00                                                                     | 47.80 | -    |    | 279.00                                                                     | 49.30 | -    |    |
| 281.00                                                                     | 47.40 | -    |    | 281.00                                                                     | 48.90 | -    |    |
| 283.00                                                                     | 47.10 | -    |    | 283.00                                                                     | 48.60 | -    |    |
| 285.00                                                                     | 46.80 | -    | 7  | 285.00                                                                     | 48.30 | -    | 7  |
| 287.00                                                                     | 46.40 | -    |    | 287.00                                                                     | 48.00 | -    |    |
| 289.00                                                                     | 46.20 | -    |    | 289.00                                                                     | 47.80 | -    |    |
| 291.00                                                                     | 45.80 | -    |    | 291.00                                                                     | 47.60 | -    |    |
| 293.00                                                                     | 45.70 | -    |    | 293.00                                                                     | 47.50 | -    |    |
| <b>DES17.3 - [Ch][Cl]:EG (1:6)</b><br>$x_1=0.143, x_2=0.857, x_3=0.000$    |       |      |    | <b>DES17.4 - [Ch][Cl]:EG (1:5.67)</b><br>$x_1=0.150, x_2=0.850, x_3=0.000$ |       |      |    |
|                                                                            |       |      |    | 277.00                                                                     | 51.40 | -    |    |
|                                                                            |       |      |    | 279.00                                                                     | 51.20 | -    |    |
|                                                                            |       |      |    | 281.00                                                                     | 51.00 | -    |    |
|                                                                            |       |      |    | 283.00                                                                     | 50.70 | -    |    |
| 298.15                                                                     | 46.90 | 0.01 | 14 | 285.00                                                                     | 50.40 | -    | 7  |
|                                                                            |       |      |    | 287.00                                                                     | 50.20 | -    |    |
|                                                                            |       |      |    | 289.00                                                                     | 49.90 | -    |    |
|                                                                            |       |      |    | 291.00                                                                     | 49.70 | -    |    |
|                                                                            |       |      |    | 293.00                                                                     | 49.60 | -    |    |
| <b>DES17.5 - [Ch][Cl]:EG (1:4)</b><br>$x_1=0.200, x_2=0.800, x_3=0.000$    |       |      |    | <b>DES17.6 - [Ch][Cl]:EG (1:3)</b><br>$x_1=0.250, x_2=0.750, x_3=0.000$    |       |      |    |
| 277.00                                                                     | 50.60 | -    |    | 277.00                                                                     | 50.80 | -    |    |
| 279.00                                                                     | 50.20 | -    |    | 279.00                                                                     | 50.40 | -    |    |
| 281.00                                                                     | 50.00 | -    |    | 281.00                                                                     | 50.00 | -    |    |
| 283.00                                                                     | 49.80 | -    |    | 283.00                                                                     | 49.60 | -    |    |
| 285.00                                                                     | 49.70 | -    | 7  | 285.00                                                                     | 49.40 | -    | 7  |
| 287.00                                                                     | 49.40 | -    |    | 287.00                                                                     | 49.20 | -    |    |
| 289.00                                                                     | 49.30 | -    |    | 289.00                                                                     | 48.90 | -    |    |
| 291.00                                                                     | 49.20 | -    |    | 291.00                                                                     | 48.60 | -    |    |
| 293.00                                                                     | 49.00 | -    |    | 293.00                                                                     | 48.30 | -    |    |
| <b>DES17.7 - [Ch][Cl]:EG (1:2.33)</b><br>$x_1=0.300, x_2=0.700, x_3=0.000$ |       |      |    | <b>DES17.8 - [Ch][Cl]:EG (1:2)</b><br>$x_1=0.333, x_2=0.667, x_3=0.000$    |       |      |    |
| 277.00                                                                     | 49.60 | -    |    | 277.00                                                                     | 50.00 | -    |    |
| 279.00                                                                     | 49.20 | -    |    | 279.00                                                                     | 49.80 | -    |    |
| 281.00                                                                     | 48.90 | -    |    | 281.00                                                                     | 49.40 | -    |    |
| 283.00                                                                     | 48.70 | -    |    | 283.00                                                                     | 49.20 | -    |    |
| 285.00                                                                     | 48.40 | -    | 7  | 285.00                                                                     | 49.10 | -    | 7  |
| 287.00                                                                     | 48.20 | -    |    | 287.00                                                                     | 48.60 | -    |    |
| 289.00                                                                     | 48.00 | -    |    | 289.00                                                                     | 48.30 | -    |    |
| 291.00                                                                     | 47.70 | -    |    | 291.00                                                                     | 47.90 | -    |    |
| 293.00                                                                     | 47.50 | -    |    | 293.00                                                                     | 47.70 | -    |    |
| <b>DES18.1 - [Ch][Cl]:Fru (1:1)</b><br>$x_1=0.500, x_2=0.500, x_3=0.000$   |       |      |    | <b>DES18.2 - [Ch][Cl]:Fru (1.5:1)</b><br>$x_1=0.600, x_2=0.400, x_3=0.000$ |       |      |    |
| 298.15                                                                     | 70.40 | 0.10 |    | 298.15                                                                     | 73.60 | 0.10 |    |
| 308.15                                                                     | 68.00 | 0.10 |    | 308.15                                                                     | 71.70 | 0.10 |    |
| 318.15                                                                     | 66.00 | 0.10 |    | 318.15                                                                     | 69.50 | 0.10 |    |
| 328.15                                                                     | 64.40 | 0.10 | 15 | 328.15                                                                     | 67.30 | 0.10 | 15 |
| 338.15                                                                     | 62.60 | 0.10 |    | 338.15                                                                     | 65.60 | 0.10 |    |
| 348.15                                                                     | 61.00 | 0.10 |    | 348.15                                                                     | 63.00 | 0.10 |    |
| 358.15                                                                     | 59.00 | 0.10 |    | 358.15                                                                     | 61.30 | 0.10 |    |
| <b>DES18.3 - [Ch][Cl]:Fru (2:1)</b><br>$x_1=0.667, x_2=0.333, x_3=0.000$   |       |      |    | <b>DES18.4 - [Ch][Cl]:Fru (2.5:1)</b><br>$x_1=0.714, x_2=0.286, x_3=0.000$ |       |      |    |
| 298.15                                                                     | 74.00 | 0.10 | 15 | 298.15                                                                     | 75.00 | 0.10 | 15 |
| 308.15                                                                     | 72.00 | 0.10 |    | 308.15                                                                     | 73.00 | 0.10 |    |

|                                                                                              |       |      |       |                                                                             |       |      |    |
|----------------------------------------------------------------------------------------------|-------|------|-------|-----------------------------------------------------------------------------|-------|------|----|
| 318.15                                                                                       | 70.00 | 0.10 |       | 318.15                                                                      | 71.00 | 0.10 |    |
| 328.15                                                                                       | 68.00 | 0.10 |       | 328.15                                                                      | 69.00 | 0.10 |    |
| 338.15                                                                                       | 66.00 | 0.10 |       | 338.15                                                                      | 67.00 | 0.10 |    |
| 348.15                                                                                       | 64.00 | 0.10 |       | 348.15                                                                      | 65.00 | 0.10 |    |
| 358.15                                                                                       | 62.00 | 0.10 |       | 358.15                                                                      | 63.00 | 0.10 |    |
| <b>DES19</b> - [Ch][Cl]:Glu:H <sub>2</sub> O (3:1:3)<br>$x_1=0.429, x_2=0.143, x_3=0.429$    |       |      |       | <b>DES20.1</b> - [Ch][Cl]:Glu (1:1)<br>$x_1=0.500, x_2=0.500, x_3=0.000$    |       |      |    |
| 298.15                                                                                       | 78.70 | 0.01 |       |                                                                             |       |      |    |
| 300.65                                                                                       | 78.00 | 0.01 |       |                                                                             |       |      |    |
| 303.15                                                                                       | 77.20 | 0.01 |       |                                                                             |       |      |    |
| 305.65                                                                                       | 76.30 | 0.01 |       |                                                                             |       |      |    |
| 308.15                                                                                       | 75.70 | 0.01 |       |                                                                             |       |      |    |
| 310.65                                                                                       | 74.70 | 0.01 |       |                                                                             |       |      |    |
| 313.15                                                                                       | 73.80 | 0.01 |       |                                                                             |       |      |    |
| 315.65                                                                                       | 73.20 | 0.01 |       |                                                                             |       |      |    |
| 318.15                                                                                       | 72.30 | 0.01 | 16    | 293.15                                                                      | 73.10 | 0.01 | 17 |
| 320.65                                                                                       | 71.50 | 0.01 |       |                                                                             |       |      |    |
| 323.15                                                                                       | 70.90 | 0.01 |       |                                                                             |       |      |    |
| 325.65                                                                                       | 69.90 | 0.01 |       |                                                                             |       |      |    |
| 328.15                                                                                       | 69.20 | 0.01 |       |                                                                             |       |      |    |
| 330.65                                                                                       | 68.30 | 0.01 |       |                                                                             |       |      |    |
| 333.15                                                                                       | 67.60 | 0.01 |       |                                                                             |       |      |    |
| 335.65                                                                                       | 66.70 | 0.01 |       |                                                                             |       |      |    |
| 338.15                                                                                       | 65.80 | 0.01 |       |                                                                             |       |      |    |
| <b>DES20.2</b> - [Ch][Cl]:Glu (1.5:1)<br>$x_1=0.600, x_2=0.400, x_3=0.000$                   |       |      |       | <b>DES20.3</b> - [Ch][Cl]:Glu (1:2)<br>$x_1=0.333, x_2=0.667, x_3=0.000$    |       |      |    |
|                                                                                              |       |      |       | 298.15                                                                      | 71.71 | 0.10 |    |
|                                                                                              |       |      |       | 308.15                                                                      | 71.11 | 0.10 |    |
|                                                                                              |       |      |       | 318.15                                                                      | 70.42 | 0.10 |    |
| 293.15                                                                                       | 72.70 | 0.01 | 17    | 328.15                                                                      | 69.95 | 0.10 | 18 |
|                                                                                              |       |      |       | 338.15                                                                      | 69.44 | 0.10 |    |
|                                                                                              |       |      |       | 348.15                                                                      | 68.91 | 0.10 |    |
|                                                                                              |       |      |       | 358.15                                                                      | 68.61 | 0.10 |    |
| <b>DES20.4</b> - [Ch][Cl]:Glu (2:1)<br>$x_1=0.667, x_2=0.333, x_3=0.000$                     |       |      |       | <b>DES20.5</b> - [Ch][Cl]:Glu (2.5:1)<br>$x_1=0.714, x_2=0.286, x_3=0.000$  |       |      |    |
| 293.15                                                                                       | 71.70 | 0.01 |       |                                                                             |       |      |    |
| 298.15                                                                                       | 71.10 | 0.20 |       |                                                                             |       |      |    |
| 308.15                                                                                       | 70.40 | 0.20 |       |                                                                             |       |      |    |
| 318.15                                                                                       | 70.00 | 0.20 | 17,19 | 293.15                                                                      | 75.00 | 0.01 | 17 |
| 328.15                                                                                       | 69.40 | 0.20 |       |                                                                             |       |      |    |
| 338.15                                                                                       | 68.90 | 0.20 |       |                                                                             |       |      |    |
| 348.15                                                                                       | 68.90 | 0.20 |       |                                                                             |       |      |    |
| 358.15                                                                                       | 68.60 | 0.20 |       |                                                                             |       |      |    |
| <b>DES21</b> - [Ch][Cl]:Gly:H <sub>2</sub> O (1:2:5.51)<br>$x_1=0.118, x_2=0.235, x_3=0.647$ |       |      |       | <b>DES22.1</b> - [Ch][Cl]:Gly (1:19)<br>$x_1=0.050, x_2=0.950, x_3=0.000$   |       |      |    |
|                                                                                              |       |      |       | 293.00                                                                      | 63.70 | -    |    |
|                                                                                              |       |      |       | 298.00                                                                      | 62.80 | -    |    |
|                                                                                              |       |      |       | 303.00                                                                      | 62.00 | -    |    |
| 313.15                                                                                       | 56.12 | 0.14 | 9     | 308.00                                                                      | 61.30 | -    | 7  |
| 333.15                                                                                       | 42.55 | 0.07 |       | 313.00                                                                      | 60.50 | -    |    |
|                                                                                              |       |      |       | 318.00                                                                      | 59.80 | -    |    |
|                                                                                              |       |      |       | 323.00                                                                      | 59.30 | -    |    |
|                                                                                              |       |      |       | 328.00                                                                      | 58.70 | -    |    |
| <b>DES22.2</b> - [Ch][Cl]:Gly (1:9)<br>$x_1=0.150, x_2=0.850, x_3=0.000$                     |       |      |       | <b>DES22.3</b> - [Ch][Cl]:Gly (1:5.67)<br>$x_1=0.150, x_2=0.850, x_3=0.000$ |       |      |    |
| 293.00                                                                                       | 61.60 | -    |       | 293.00                                                                      | 60.80 | -    |    |
| 298.00                                                                                       | 61.00 | -    |       | 298.00                                                                      | 60.20 | -    |    |
| 303.00                                                                                       | 60.30 | -    |       | 303.00                                                                      | 59.70 | -    |    |
| 308.00                                                                                       | 59.50 | -    | 7     | 308.00                                                                      | 59.10 | -    | 7  |
| 313.00                                                                                       | 59.00 | -    |       | 313.00                                                                      | 58.70 | -    |    |
| 318.00                                                                                       | 58.40 | -    |       | 318.00                                                                      | 58.10 | -    |    |
| 323.00                                                                                       | 57.90 | -    |       | 323.00                                                                      | 57.60 | -    |    |
| 328.00                                                                                       | 57.50 | -    |       | 328.00                                                                      | 57.30 | -    |    |
| <b>DES22.4</b> - [Ch][Cl]:Gly (1:4)<br>$x_1=0.200, x_2=0.800, x_3=0.000$                     |       |      |       | <b>DES22.5</b> - [Ch][Cl]:Gly (1:3)<br>$x_1=0.250, x_2=0.750, x_3=0.000$    |       |      |    |
| 293.00                                                                                       | 57.40 | -    |       | 293.00                                                                      | 50.80 | -    |    |
| 298.00                                                                                       | 57.00 | -    |       | 298.00                                                                      | 50.30 | -    |    |
| 303.00                                                                                       | 56.60 | -    |       | 303.00                                                                      | 49.90 | -    |    |
| 308.00                                                                                       | 56.10 | -    | 7     | 308.00                                                                      | 49.30 | -    | 7  |
| 313.00                                                                                       | 55.70 | -    |       | 313.00                                                                      | 48.90 | -    |    |
| 318.00                                                                                       | 55.20 | -    |       | 318.00                                                                      | 48.40 | -    |    |
| 323.00                                                                                       | 54.80 | -    |       | 323.00                                                                      | 48.00 | -    |    |

|                                                                                               |       |      |    |                                                                                               |       |      |    |
|-----------------------------------------------------------------------------------------------|-------|------|----|-----------------------------------------------------------------------------------------------|-------|------|----|
| 328.00                                                                                        | 54.40 | -    |    | 328.00                                                                                        | 47.60 | -    |    |
| <b>DES22.6</b> - [Ch][Cl]:Gly (1:2.33)<br>$x_1=0.250, x_2=0.750, x_3=0.000$                   |       |      |    | <b>DES22.7</b> - [Ch][Cl]:Gly (1:2)<br>$x_1=0.250, x_2=0.750, x_3=0.000$                      |       |      |    |
| 293.00                                                                                        | 48.50 | -    |    | 293.00                                                                                        | 55.80 | -    |    |
| 298.00                                                                                        | 48.00 | -    |    | 298.00                                                                                        | 55.40 | -    |    |
| 303.00                                                                                        | 47.50 | -    |    | 303.00                                                                                        | 55.00 | -    |    |
| 308.00                                                                                        | 47.10 | -    |    | 308.00                                                                                        | 54.70 | -    |    |
| 313.00                                                                                        | 46.70 | -    | 7  | 313.00                                                                                        | 54.20 | -    | 7  |
| 318.00                                                                                        | 46.40 | -    |    | 318.00                                                                                        | 53.80 | -    |    |
| 323.00                                                                                        | 46.00 | -    |    | 323.00                                                                                        | 53.40 | -    |    |
| 328.00                                                                                        | 45.60 | -    |    | 328.00                                                                                        | 53.00 | -    |    |
| <b>DES23.1</b> - [Ch][Cl]:HexOH (1:19)<br>$x_1=0.050, x_2=0.950, x_3=0.000$                   |       |      |    | <b>DES23.2</b> - [Ch][Cl]:HexOH (1:9)<br>$x_1=0.150, x_2=0.850, x_3=0.000$                    |       |      |    |
| 316.50                                                                                        | 42.30 | -    |    | 316.50                                                                                        | 42.60 | -    |    |
| 319.00                                                                                        | 42.10 | -    |    | 319.00                                                                                        | 42.40 | -    |    |
| 321.50                                                                                        | 41.90 | -    |    | 321.50                                                                                        | 42.30 | -    |    |
| 324.00                                                                                        | 41.50 | -    |    | 324.00                                                                                        | 41.80 | -    |    |
| 326.50                                                                                        | 41.30 | -    | 7  | 326.50                                                                                        | 41.70 | -    | 7  |
| 329.00                                                                                        | 41.20 | -    |    | 329.00                                                                                        | 41.60 | -    |    |
| 331.50                                                                                        | 41.10 | -    |    | 331.50                                                                                        | 41.50 | -    |    |
| 334.50                                                                                        | 41.00 | -    |    | 334.50                                                                                        | 41.30 | -    |    |
| <b>DES23.3</b> - [Ch][Cl]:HexOH (1:5.67)<br>$x_1=0.150, x_2=0.850, x_3=0.000$                 |       |      |    | <b>DES23.4</b> - [Ch][Cl]:HexOH (1:4)<br>$x_1=0.200, x_2=0.800, x_3=0.000$                    |       |      |    |
| 316.50                                                                                        | 42.80 | -    |    | 316.50                                                                                        | 43.20 | -    |    |
| 319.00                                                                                        | 42.60 | -    |    | 319.00                                                                                        | 43.10 | -    |    |
| 321.50                                                                                        | 42.50 | -    |    | 321.50                                                                                        | 43.00 | -    |    |
| 324.00                                                                                        | 42.40 | -    |    | 324.00                                                                                        | 42.90 | -    |    |
| 326.50                                                                                        | 42.20 | -    | 7  | 326.50                                                                                        | 42.60 | -    | 7  |
| 329.00                                                                                        | 42.20 | -    |    | 329.00                                                                                        | 42.60 | -    |    |
| 331.50                                                                                        | 42.00 | -    |    | 331.50                                                                                        | 42.50 | -    |    |
| 334.50                                                                                        | 42.00 | -    |    | 334.50                                                                                        | 42.30 | -    |    |
| <b>DES23.5</b> - [Ch][Cl]:HexOH (1:3)<br>$x_1=0.250, x_2=0.750, x_3=0.000$                    |       |      |    | <b>DES24</b> - [Ch][Cl]:LacA:H <sub>2</sub> O (1:2:5.26)<br>$x_1=0.121, x_2=0.242, x_3=0.637$ |       |      |    |
| 316.50                                                                                        | 43.60 | -    |    |                                                                                               |       |      |    |
| 319.00                                                                                        | 43.50 | -    |    |                                                                                               |       |      |    |
| 321.50                                                                                        | 43.40 | -    |    |                                                                                               |       |      |    |
| 324.00                                                                                        | 43.30 | -    | 7  | 313.15                                                                                        | 42.42 | 0.12 | 9  |
| 326.50                                                                                        | 43.10 | -    |    | 333.15                                                                                        | 32.02 | 0.11 |    |
| 329.00                                                                                        | 42.90 | -    |    |                                                                                               |       |      |    |
| 331.50                                                                                        | 42.70 | -    |    |                                                                                               |       |      |    |
| 334.50                                                                                        | 42.70 | -    |    |                                                                                               |       |      |    |
| <b>DES25</b> - [Ch][Cl]:LacA (1:2)<br>$x_1=0.333, x_2=0.667, x_3=0.000$                       |       |      |    | <b>DES26</b> - [Ch][Cl]:LevA (1:2)<br>$x_1=0.333, x_2=0.667, x_3=0.000$                       |       |      |    |
| 298.20                                                                                        | 48.00 | 0.10 |    |                                                                                               |       |      |    |
| 303.30                                                                                        | 47.60 | 0.10 |    |                                                                                               |       |      |    |
| 308.30                                                                                        | 47.30 | 0.10 |    |                                                                                               |       |      |    |
| 313.50                                                                                        | 47.00 | 0.10 |    |                                                                                               |       |      |    |
| 319.20                                                                                        | 46.70 | 0.10 | 20 | 298.15                                                                                        | 39.35 | 1.00 | 21 |
| 323.50                                                                                        | 46.50 | 0.10 |    |                                                                                               |       |      |    |
| 328.60                                                                                        | 46.20 | 0.10 |    |                                                                                               |       |      |    |
| 333.20                                                                                        | 46.00 | 0.10 |    |                                                                                               |       |      |    |
| 338.10                                                                                        | 45.70 | 0.10 |    |                                                                                               |       |      |    |
| <b>DES27</b> - [Ch][Cl]:Mal:H <sub>2</sub> O (1:2:18.54)<br>$x_1=0.046, x_2=0.093, x_3=0.861$ |       |      |    | <b>DES28.1</b> - [Ch][Cl]:MalA:H <sub>2</sub> O (1:1:20)<br>$x_1=0.045, x_2=0.045, x_3=0.909$ |       |      |    |
| 313.15                                                                                        | 74.49 | 0.90 | 9  |                                                                                               |       |      |    |
| 333.15                                                                                        | 37.36 | 1.12 |    | 323.15                                                                                        | 68.20 | 0.10 | 22 |
| <b>DES28.2</b> - [Ch][Cl]:MalA:H <sub>2</sub> O (1:1:20)<br>$x_1=0.083, x_2=0.083, x_3=0.833$ |       |      |    | <b>DES28.3</b> - [Ch][Cl]:MalA:H <sub>2</sub> O (1:1:20)<br>$x_1=0.143, x_2=0.143, x_3=0.714$ |       |      |    |
| 323.15                                                                                        | 59.90 | 0.20 | 22 | 323.15                                                                                        | 57.10 | 0.70 | 22 |
| <b>DES28.4</b> - [Ch][Cl]:MalA:H <sub>2</sub> O (1:1:20)<br>$x_1=0.250, x_2=0.250, x_3=0.500$ |       |      |    | <b>DES29</b> - [Ch][Cl]:MalA (1:1)<br>$x_1=0.500, x_2=0.500, x_3=0.000$                       |       |      |    |
| 323.15                                                                                        | 62.80 | 0.20 | 22 | 298.15                                                                                        | 65.70 | 0.02 |    |
|                                                                                               |       |      |    | 325.15                                                                                        | 64.40 | 0.20 | 23 |
|                                                                                               |       |      |    | 425.15                                                                                        | 52.30 | 1.90 |    |
| <b>DES30.1</b> - [Ch][Cl]:MEA (1:8)<br>$x_1=0.110, x_2=0.890, x_3=0.000$                      |       |      |    | <b>DES30.2</b> - [Ch][Cl]:MEA (1:7)<br>$x_1=0.130, x_2=0.870, x_3=0.000$                      |       |      |    |
| 298.15                                                                                        | 49.60 | 0.10 |    | 298.15                                                                                        | 49.20 | 0.10 |    |
| 308.15                                                                                        | 48.80 | 0.10 |    | 308.15                                                                                        | 48.50 | 0.10 |    |
| 318.15                                                                                        | 47.90 | 0.10 | 24 | 318.15                                                                                        | 47.80 | 0.10 | 24 |
| 328.15                                                                                        | 47.20 | 0.10 |    | 328.15                                                                                        | 47.10 | 0.10 |    |
| 338.15                                                                                        | 46.40 | 0.10 |    | 338.15                                                                                        | 46.40 | 0.10 |    |



|                                                                                                                         |         |      |    |                                                                                                                         |       |      |    |
|-------------------------------------------------------------------------------------------------------------------------|---------|------|----|-------------------------------------------------------------------------------------------------------------------------|-------|------|----|
| 348.15                                                                                                                  | 45.80   | 0.10 |    | 348.15                                                                                                                  | 45.80 | 0.10 |    |
| 358.15                                                                                                                  | 45.00   | 0.10 |    | 358.15                                                                                                                  | 44.90 | 0.10 |    |
| <b>DES30.3</b> - [Ch][Cl]:MEA (1:6)<br>$x_1=0.140, x_2=0.860, x_3=0.000$                                                |         |      |    | <b>DES30.4</b> - [Ch][Cl]:MEA (1:5)<br>$x_1=0.160, x_2=0.840, x_3=0.000$                                                |       |      |    |
| 298.15                                                                                                                  | 48.2755 | 0.10 |    | 298.15                                                                                                                  | 48.20 | 0.10 |    |
| 308.15                                                                                                                  | 47.9073 | 0.10 |    | 308.15                                                                                                                  | 47.60 | 0.10 |    |
| 318.15                                                                                                                  | 47.3597 | 0.10 |    | 318.15                                                                                                                  | 46.90 | 0.10 |    |
| 328.15                                                                                                                  | 46.7494 | 0.10 | 24 | 328.15                                                                                                                  | 46.20 | 0.10 | 24 |
| 338.15                                                                                                                  | 46.1479 | 0.10 |    | 338.15                                                                                                                  | 45.60 | 0.10 |    |
| 348.15                                                                                                                  | 45.5893 | 0.10 |    | 348.15                                                                                                                  | 45.00 | 0.10 |    |
| 358.15                                                                                                                  | 45.0869 | 0.10 |    | 358.15                                                                                                                  | 44.40 | 0.10 |    |
| <b>DES31</b> - [Ch][Cl]:Nin (1:0.75)<br>$x_1=0.571, x_2=0.429, x_3=0.000$                                               |         |      |    | <b>DES32</b> - [Ch][Cl]:OA:H <sub>2</sub> O (1:1:2)<br>$x_1=0.250, x_2=0.250, x_3=0.500$                                |       |      |    |
| 308.15                                                                                                                  | 63.70   | 0.20 |    |                                                                                                                         |       |      |    |
| 313.15                                                                                                                  | 63.12   | 0.20 |    |                                                                                                                         |       |      |    |
| 318.15                                                                                                                  | 62.57   | 0.20 | 25 | 298.15                                                                                                                  | 60.80 | 1.00 | 26 |
| 323.15                                                                                                                  | 62.01   | 0.20 |    |                                                                                                                         |       |      |    |
| 328.15                                                                                                                  | 61.51   | 0.20 |    |                                                                                                                         |       |      |    |
| 333.15                                                                                                                  | 61.02   | 0.20 |    |                                                                                                                         |       |      |    |
| <b>DES33</b> - [Ch][Cl]:OA (1:2)<br>$x_1=0.333, x_2=0.667, x_3=0.000$                                                   |         |      |    | <b>DES34</b> - [Ch][Cl]:PAA (2:1)<br>$x_1=0.667, x_2=0.333, x_3=0.000$                                                  |       |      |    |
| 298.15                                                                                                                  | 75.30   | -    | 27 | 298.15                                                                                                                  | 41.86 | -    | 28 |
| <b>DES35.1</b> - [Ch][Cl]:PEG200:Act (1:4:45)<br>$x_1=0.020, x_2=0.080, x_3=0.900$                                      |         |      |    | <b>DES35.2</b> - [Ch][Cl]:PEG200:Act (1:4:20)<br>$x_1=0.040, x_2=0.160, x_3=0.800$                                      |       |      |    |
| 298.00                                                                                                                  | 22.55   | 0.10 | 29 | 298.00                                                                                                                  | 26.99 | 0.10 | 29 |
| <b>DES35.3</b> - [Ch][Cl]:PEG200:Act (1:4:11.67)<br>$x_1=0.060, x_2=0.240, x_3=0.700$                                   |         |      |    | <b>DES35.4</b> - [Ch][Cl]:PEG200:Act (1:4:7.5)<br>$x_1=0.080, x_2=0.320, x_3=0.600$                                     |       |      |    |
| 298.00                                                                                                                  | 35.74   | 0.10 | 29 | 298.00                                                                                                                  | 37.90 | 0.10 | 29 |
| <b>DES35.5</b> - [Ch][Cl]:PEG200:Act (1:4:5)<br>$x_1=0.100, x_2=0.400, x_3=0.500$                                       |         |      |    | <b>DES35.6</b> - [Ch][Cl]:PEG200:Act (1:4:3.33)<br>$x_1=0.120, x_2=0.480, x_3=0.400$                                    |       |      |    |
| 298.00                                                                                                                  | 38.17   | 0.10 | 29 | 298.00                                                                                                                  | 39.91 | 0.10 | 29 |
| <b>DES35.7</b> - [Ch][Cl]:PEG200:Act (1:4:2.14)<br>$x_1=0.140, x_2=0.560, x_3=0.300$                                    |         |      |    | <b>DES35.8</b> - [Ch][Cl]:PEG200:Act (1:4:1.25)<br>$x_1=0.160, x_2=0.640, x_3=0.200$                                    |       |      |    |
| 298.00                                                                                                                  | 41.93   | 0.10 | 29 | 298.00                                                                                                                  | 43.68 | 0.10 | 29 |
| <b>DES35.9</b> - [Ch][Cl]:PEG200:Act (1:4:0.56)<br>$x_1=0.180, x_2=0.720, x_3=0.100$                                    |         |      |    | <b>DES36.1</b> - [Ch][Cl]:PEG200:EtAc (1:4:45)<br>$x_1=0.020, x_2=0.080, x_3=0.900$                                     |       |      |    |
| 298.00                                                                                                                  | 45.56   | 0.10 | 29 | 298.00                                                                                                                  | 20.26 | 0.10 | 29 |
| <b>DES36.2</b> - [Ch][Cl]:PEG200:EtAc (1:4:20)<br>$x_1=0.040, x_2=0.160, x_3=0.800$                                     |         |      |    | <b>DES36.3</b> - [Ch][Cl]:PEG200:EtAc (1:4:11.67)<br>$x_1=0.060, x_2=0.240, x_3=0.700$                                  |       |      |    |
| 298.00                                                                                                                  | 21.21   | 0.10 | 29 | 298.00                                                                                                                  | 21.35 | 0.10 | 29 |
| <b>DES36.4</b> - [Ch][Cl]:PEG200:EtAc (1:4:7.5)<br>$x_1=0.080, x_2=0.320, x_3=0.600$                                    |         |      |    | <b>DES36.5</b> - [Ch][Cl]:PEG200:EtAc (1:4:5)<br>$x_1=0.100, x_2=0.400, x_3=0.500$                                      |       |      |    |
| 298.00                                                                                                                  | 27.54   | 0.10 | 29 | 298.00                                                                                                                  | 29.01 | 0.10 | 29 |
| <b>DES36.6</b> - [Ch][Cl]:PEG200:EtAc (1:4:3.33)<br>$x_1=0.120, x_2=0.480, x_3=0.400$                                   |         |      |    | <b>DES36.7</b> - [Ch][Cl]:PEG200:EtAc (1:4:2.14)<br>$x_1=0.140, x_2=0.560, x_3=0.300$                                   |       |      |    |
| 298.00                                                                                                                  | 33.72   | 0.10 | 29 | 298.00                                                                                                                  | 36.69 | 0.10 | 29 |
| <b>DES36.8</b> - [Ch][Cl]:PEG200:EtAc (1:4:1.25)<br>$x_1=0.160, x_2=0.640, x_3=0.200$                                   |         |      |    | <b>DES36.9</b> - [Ch][Cl]:PEG200:EtAc (1:4:0.56)<br>$x_1=0.180, x_2=0.720, x_3=0.100$                                   |       |      |    |
| 298.00                                                                                                                  | 39.91   | 0.10 | 29 | 298.00                                                                                                                  | 43.54 | 0.10 | 29 |
| <b>DES37.1</b> - [Ch][Cl]:PEG200:Eth (1:4:45)<br>$x_1=0.020, x_2=0.080, x_3=0.900$                                      |         |      |    | <b>DES37.2</b> - [Ch][Cl]:PEG200:Eth (1:4:20)<br>$x_1=0.040, x_2=0.160, x_3=0.800$                                      |       |      |    |
| 298.00                                                                                                                  | 20.94   | 0.10 | 29 | 298.00                                                                                                                  | 24.70 | 0.10 | 29 |
| <b>DES37.3</b> - [Ch][Cl]:PEG200:Eth (1:4:11.67)<br>$x_1=0.060, x_2=0.240, x_3=0.700$                                   |         |      |    | <b>DES37.4</b> - [Ch][Cl]:PEG200:Eth (1:4:7.5)<br>$x_1=0.080, x_2=0.320, x_3=0.600$                                     |       |      |    |
| 298.00                                                                                                                  | 29.83   | 0.10 | 29 | 298.00                                                                                                                  | 33.32 | 0.10 | 29 |
| <b>DES37.5</b> - [Ch][Cl]:PEG200:Eth (1:4:5)<br>$x_1=0.100, x_2=0.400, x_3=0.500$                                       |         |      |    | <b>DES37.6</b> - [Ch][Cl]:PEG200:Eth (1:4:3.33)<br>$x_1=0.120, x_2=0.480, x_3=0.400$                                    |       |      |    |
| 298.00                                                                                                                  | 34.13   | 0.10 | 29 | 298.00                                                                                                                  | 37.35 | 0.10 | 29 |
| <b>DES37.7</b> - [Ch][Cl]:PEG200:Eth (1:4:2.14)<br>$x_1=0.140, x_2=0.560, x_3=0.300$                                    |         |      |    | <b>DES37.8</b> - [Ch][Cl]:PEG200:Eth (1:4:1.25)<br>$x_1=0.160, x_2=0.640, x_3=0.200$                                    |       |      |    |
| 298.00                                                                                                                  | 39.10   | 0.10 | 29 | 298.00                                                                                                                  | 42.07 | 0.10 | 29 |
| <b>DES37.9</b> - [Ch][Cl]:PEG200:Eth (1:4:0.56)<br>$x_1=0.180, x_2=0.720, x_3=0.100$                                    |         |      |    | <b>DES38.1</b> - [Ch][Cl]:PEG200:FeCl <sub>3</sub> :Act (1:4:0.1:45.92)<br>$x_1=0.020, x_2=0.078, x_3=0.002, x_4=0.900$ |       |      |    |
| 298.00                                                                                                                  | 43.15   | 0.10 | 29 | 298.00                                                                                                                  | 22.54 | 0.10 | 29 |
| <b>DES38.2</b> - [Ch][Cl]:PEG200:FeCl <sub>3</sub> :Act (1:4:0.1:20.41)<br>$x_1=0.039, x_2=0.157, x_3=0.004, x_4=0.800$ |         |      |    | <b>DES38.3</b> - [Ch][Cl]:PEG200:FeCl <sub>3</sub> :Act (1:4:0.1:11.9)<br>$x_1=0.059, x_2=0.235, x_3=0.006, x_4=0.700$  |       |      |    |
| 298.00                                                                                                                  | 27.47   | 0.10 | 29 | 298.00                                                                                                                  | 32.52 | 0.10 | 29 |
| <b>DES38.4</b> - [Ch][Cl]:PEG200:FeCl <sub>3</sub> :Act (1:4:0.1:7.65)<br>$x_1=0.078, x_2=0.314, x_3=0.008, x_4=0.600$  |         |      |    | <b>DES38.5</b> - [Ch][Cl]:PEG200:FeCl <sub>3</sub> :Act (1:4:0.1:5.1)<br>$x_1=0.098, x_2=0.392, x_3=0.010, x_4=0.500$   |       |      |    |
| 298.00                                                                                                                  | 36.98   | 0.10 | 29 | 298.00                                                                                                                  | 37.11 | 0.10 | 29 |
| <b>DES38.6</b> - [Ch][Cl]:PEG200:FeCl <sub>3</sub> :Act (1:4:0.1:3.4)                                                   |         |      |    | <b>DES38.7</b> - [Ch][Cl]:PEG200:FeCl <sub>3</sub> :Act (1:4:0.1:2.19)                                                  |       |      |    |

|                                                                                                                                              |                                                                                                                                              |
|----------------------------------------------------------------------------------------------------------------------------------------------|----------------------------------------------------------------------------------------------------------------------------------------------|
| $x_1 = 0.118, x_2 = 0.470, x_3 = 0.012, x_4 = 0.400$                                                                                         | $x_1 = 0.137, x_2 = 0.549, x_3 = 0.014, x_4 = 0.300$                                                                                         |
| 298.00 38.47 0.10 <sup>29</sup>                                                                                                              | 298.00 39.97 0.10 <sup>29</sup>                                                                                                              |
| <b>DES38.8</b> - [Ch][Cl]:PEG200:FeCl <sub>3</sub> :Act (1:4:0.1:1.28)<br>$x_1 = 0.157, x_2 = 0.667, x_3 = 0.016, x_4 = 0.200$               | <b>DES38.9</b> - [Ch][Cl]:PEG200:FeCl <sub>3</sub> :Act (1:4:0.1:0.57)<br>$x_1 = 0.176, x_2 = 0.706, x_3 = 0.018, x_4 = 0.100$               |
| 298.00 39.74 0.10 <sup>29</sup>                                                                                                              | 298.00 38.58 0.10 <sup>29</sup>                                                                                                              |
| <b>DES39.1</b> - [Ch][Cl]:PEG200:FeCl <sub>3</sub> :EtAc (1:4:0.1:45.92)<br>$x_1 = 0.020, x_2 = 0.078, x_3 = 0.002, x_4 = 0.900$             | <b>DES39.2</b> - [Ch][Cl]:PEG200:FeCl <sub>3</sub> :EtAc (1:4:0.1:20.41)<br>$x_1 = 0.039, x_2 = 0.157, x_3 = 0.004, x_4 = 0.800$             |
| 298.00 20.70 0.10 <sup>29</sup>                                                                                                              | 298.00 21.05 0.10 <sup>29</sup>                                                                                                              |
| <b>DES39.3</b> - [Ch][Cl]:PEG200:FeCl <sub>3</sub> :EtAc (1:4:0.1:11.9)<br>$x_1 = 0.059, x_2 = 0.235, x_3 = 0.006, x_4 = 0.700$              | <b>DES39.4</b> - [Ch][Cl]:PEG200:FeCl <sub>3</sub> :EtAc (1:4:0.1:7.65)<br>$x_1 = 0.078, x_2 = 0.314, x_3 = 0.008, x_4 = 0.600$              |
| 298.00 22.41 0.10 <sup>29</sup>                                                                                                              | 298.00 25.85 0.10 <sup>29</sup>                                                                                                              |
| <b>DES39.5</b> - [Ch][Cl]:PEG200:FeCl <sub>3</sub> :EtAc (1:4:0.1:5.1)<br>$x_1 = 0.098, x_2 = 0.392, x_3 = 0.010, x_4 = 0.500$               | <b>DES39.6</b> - [Ch][Cl]:PEG200:FeCl <sub>3</sub> :EtAc (1:4:0.1:3.4)<br>$x_1 = 0.118, x_2 = 0.470, x_3 = 0.012, x_4 = 0.400$               |
| 298.00 29.76 0.10 <sup>29</sup>                                                                                                              | 298.00 32.97 0.10 <sup>29</sup>                                                                                                              |
| <b>DES39.7</b> - [Ch][Cl]:PEG200:FeCl <sub>3</sub> :EtAc (1:4:0.1:2.19)<br>$x_1 = 0.137, x_2 = 0.549, x_3 = 0.014, x_4 = 0.300$              | <b>DES39.8</b> - [Ch][Cl]:PEG200:FeCl <sub>3</sub> :EtAc (1:4:0.1:1.28)<br>$x_1 = 0.157, x_2 = 0.627, x_3 = 0.016, x_4 = 0.200$              |
| 298.00 36.64 0.10 <sup>29</sup>                                                                                                              | 298.00 38.47 0.10 <sup>29</sup>                                                                                                              |
| <b>DES39.9</b> - [Ch][Cl]:PEG200:FeCl <sub>3</sub> :EtAc (1:4:0.1:0.57)<br>$x_1 = 0.176, x_2 = 0.706, x_3 = 0.018$                           | <b>DES40.1</b> - [Ch][Cl]:PEG200:FeCl <sub>3</sub> :Eth (1:4:0.1:45.92)<br>$x_1 = 0.020, x_2 = 0.078, x_3 = 0.002, x_4 = 0.900$              |
| 298.00 41.68 0.10 <sup>29</sup>                                                                                                              | 298.00 21.15 0.10 <sup>29</sup>                                                                                                              |
| <b>DES40.2</b> - [Ch][Cl]:PEG200:FeCl <sub>3</sub> :Eth (1:4:0.1:20.41)<br>$x_1 = 0.039, x_2 = 0.157, x_3 = 0.004, x_4 = 0.800$              | <b>DES40.3</b> - [Ch][Cl]:PEG200:FeCl <sub>3</sub> :Eth (1:4:0.1:11.9)<br>$x_1 = 0.059, x_2 = 0.235, x_3 = 0.006, x_4 = 0.700$               |
| 298.00 25.06 0.10 <sup>29</sup>                                                                                                              | 298.00 28.39 0.10 <sup>29</sup>                                                                                                              |
| <b>DES40.4</b> - [Ch][Cl]:PEG200:FeCl <sub>3</sub> :Eth (1:4:0.1:7.65)<br>$x_1 = 0.078, x_2 = 0.314, x_3 = 0.008, x_4 = 0.600$               | <b>DES40.5</b> - [Ch][Cl]:PEG200:FeCl <sub>3</sub> :Eth (1:4:0.1:5.1)<br>$x_1 = 0.098, x_2 = 0.392, x_3 = 0.010, x_4 = 0.500$                |
| 298.00 32.17 0.10 <sup>29</sup>                                                                                                              | 298.00 35.49 0.10 <sup>29</sup>                                                                                                              |
| <b>DES40.6</b> - [Ch][Cl]:PEG200:FeCl <sub>3</sub> :Eth (1:4:0.1:3.4)<br>$x_1 = 0.118, x_2 = 0.470, x_3 = 0.012, x_4 = 0.400$                | <b>DES40.7</b> - [Ch][Cl]:PEG200:FeCl <sub>3</sub> :Eth (1:4:0.1:2.19)<br>$x_1 = 0.137, x_2 = 0.549, x_3 = 0.014, x_4 = 0.300$               |
| 298.00 36.19 0.10 <sup>29</sup>                                                                                                              | 298.00 37.45 0.10 <sup>29</sup>                                                                                                              |
| <b>DES40.8</b> - [Ch][Cl]:PEG200:FeCl <sub>3</sub> :Eth (1:4:0.1:1.28)<br>$x_1 = 0.157, x_2 = 0.627, x_3 = 0.016, x_4 = 0.200$               | <b>DES40.9</b> - [Ch][Cl]:PEG200:FeCl <sub>3</sub> :Eth (1:4:0.1:0.57)<br>$x_1 = 0.176, x_2 = 0.706, x_3 = 0.018, x_4 = 0.100$               |
| 298.00 36.40 0.10 <sup>29</sup>                                                                                                              | 298.00 36.98 0.10 <sup>29</sup>                                                                                                              |
| <b>DES41.1</b> - [Ch][Cl]:PEG200:FeCl <sub>3</sub> :H <sub>2</sub> O (1:4:0.1:45.92)<br>$x_1 = 0.020, x_2 = 0.078, x_3 = 0.002, x_4 = 0.900$ | <b>DES41.2</b> - [Ch][Cl]:PEG200:FeCl <sub>3</sub> :H <sub>2</sub> O (1:4:0.1:20.41)<br>$x_1 = 0.039, x_2 = 0.157, x_3 = 0.004, x_4 = 0.800$ |
| 298.00 49.84 0.10 <sup>29</sup>                                                                                                              | 298.00 46.96 0.10 <sup>29</sup>                                                                                                              |
| <b>DES41.3</b> - [Ch][Cl]:PEG200:FeCl <sub>3</sub> :H <sub>2</sub> O (1:4:0.1:11.9)<br>$x_1 = 0.059, x_2 = 0.235, x_3 = 0.006, x_4 = 0.700$  | <b>DES41.4</b> - [Ch][Cl]:PEG200:FeCl <sub>3</sub> :H <sub>2</sub> O (1:4:0.1:7.65)<br>$x_1 = 0.078, x_2 = 0.314, x_3 = 0.008, x_4 = 0.600$  |
| 298.00 46.16 0.10 <sup>29</sup>                                                                                                              | 298.00 45.48 0.10 <sup>29</sup>                                                                                                              |
| <b>DES41.5</b> - [Ch][Cl]:PEG200:FeCl <sub>3</sub> :H <sub>2</sub> O (1:4:0.1:5.1)<br>$x_1 = 0.098, x_2 = 0.392, x_3 = 0.010, x_4 = 0.500$   | <b>DES41.6</b> - [Ch][Cl]:PEG200:FeCl <sub>3</sub> :H <sub>2</sub> O (1:4:0.1:3.4)<br>$x_1 = 0.118, x_2 = 0.470, x_3 = 0.012, x_4 = 0.400$   |
| 298.00 44.43 0.10 <sup>29</sup>                                                                                                              | 298.00 43.64 0.10 <sup>29</sup>                                                                                                              |
| <b>DES41.7</b> - [Ch][Cl]:PEG200:FeCl <sub>3</sub> :H <sub>2</sub> O (1:4:0.1:2.19)<br>$x_1 = 0.137, x_2 = 0.549, x_3 = 0.014, x_4 = 0.300$  | <b>DES41.8</b> - [Ch][Cl]:PEG200:FeCl <sub>3</sub> :H <sub>2</sub> O (1:4:0.1:1.28)<br>$x_1 = 0.157, x_2 = 0.627, x_3 = 0.016, x_4 = 0.200$  |
| 298.00 43.30 0.10 <sup>29</sup>                                                                                                              | 298.00 42.15 0.10 <sup>29</sup>                                                                                                              |
| <b>DES41.9</b> - [Ch][Cl]:PEG200:FeCl <sub>3</sub> :H <sub>2</sub> O (1:4:0.1:0.57)<br>$x_1 = 0.176, x_2 = 0.706, x_3 = 0.018, x_4 = 0.100$  | DES42.1 - [Ch][Cl]:PEG200:FeCl <sub>3</sub> :IsoOH (1:4:0.1:45.92)<br>$x_1 = 0.020, x_2 = 0.078, x_3 = 0.002, x_4 = 0.900$                   |
| 298.00 41.46 0.10 <sup>29</sup>                                                                                                              | 298.00 18.18 0.10 <sup>29</sup>                                                                                                              |
| <b>DES42.2</b> - [Ch][Cl]:PEG200:FeCl <sub>3</sub> :IsoOH (1:4:0.1:45.92)<br>$x_1 = 0.039, x_2 = 0.157, x_3 = 0.004, x_4 = 0.800$            | <b>DES42.3</b> - [Ch][Cl]:PEG200:FeCl <sub>3</sub> :IsoOH (1:4:0.1:11.9)<br>$x_1 = 0.059, x_2 = 0.235, x_3 = 0.006, x_4 = 0.700$             |
| 298.00 20.13 0.10 <sup>29</sup>                                                                                                              | 298.00 22.41 0.10 <sup>29</sup>                                                                                                              |
| <b>DES42.4</b> - [Ch][Cl]:PEG200:FeCl <sub>3</sub> :IsoOH (1:4:0.1:7.65)<br>$x_1 = 0.078, x_2 = 0.314, x_3 = 0.008, x_4 = 0.600$             | <b>DES42.5</b> - [Ch][Cl]:PEG200:FeCl <sub>3</sub> :IsoOH (1:4:0.1:5.1)<br>$x_1 = 0.098, x_2 = 0.392, x_3 = 0.010, x_4 = 0.500$              |
| 298.00 24.72 0.10 <sup>29</sup>                                                                                                              | 298.00 27.92 0.10 <sup>29</sup>                                                                                                              |
| <b>DES42.6</b> - [Ch][Cl]:PEG200:FeCl <sub>3</sub> :IsoOH (1:4:0.1:3.4)<br>$x_1 = 0.118, x_2 = 0.470, x_3 = 0.012, x_4 = 0.400$              | <b>DES42.7</b> - [Ch][Cl]:PEG200:FeCl <sub>3</sub> :IsoOH (1:4:0.1:2.19)<br>$x_1 = 0.137, x_2 = 0.549, x_3 = 0.014, x_4 = 0.300$             |
| 298.00 31.49 0.10 <sup>29</sup>                                                                                                              | 298.00 34.69 0.10 <sup>29</sup>                                                                                                              |
| <b>DES42.8</b> - [Ch][Cl]:PEG200:FeCl <sub>3</sub> :IsoOH (1:4:0.1:1.28)<br>$x_1 = 0.157, x_2 = 0.627, x_3 = 0.016, x_4 = 0.200$             | <b>DES42.9</b> - [Ch][Cl]:PEG200:FeCl <sub>3</sub> :IsoOH (1:4:0.1:0.57)<br>$x_1 = 0.176, x_2 = 0.706, x_3 = 0.018, x_4 = 0.100$             |
| 298.00 37.56 0.10 <sup>29</sup>                                                                                                              | 298.00 40.31 0.10 <sup>29</sup>                                                                                                              |
| <b>DES43</b> - [Ch][Cl]:PEG200:FeCl <sub>3</sub> (1:4:0.1)<br>$x_1 = 0.196, x_2 = 0.784, x_3 = 0.020$                                        | <b>DES44.1</b> - [Ch][Cl]:PEG200:H <sub>2</sub> O (1:4:45)<br>$x_1 = 0.020, x_2 = 0.080, x_3 = 0.900$                                        |
| 298.00 34.46 0.10                                                                                                                            |                                                                                                                                              |
| 298.00 34.35 0.10                                                                                                                            |                                                                                                                                              |
| 298.00 34.23 0.10 <sup>29</sup>                                                                                                              | 298.00 47.32 0.10 <sup>29</sup>                                                                                                              |
| 298.00 34.23 0.10                                                                                                                            |                                                                                                                                              |
| 298.00 33.88 0.10                                                                                                                            |                                                                                                                                              |
| <b>DES44.2</b> - [Ch][Cl]:PEG200:H <sub>2</sub> O (1:4:20)<br>$x_1 = 0.040, x_2 = 0.160, x_3 = 0.800$                                        | <b>DES44.3</b> - [Ch][Cl]:PEG200:H <sub>2</sub> O (1:4:11.67)<br>$x_1 = 0.060, x_2 = 0.240, x_3 = 0.700$                                     |
| 298.00 49.21 0.10 <sup>29</sup>                                                                                                              | 298.00 48.66 0.10 <sup>29</sup>                                                                                                              |
| <b>DES44.4</b> - [Ch][Cl]:PEG200:H <sub>2</sub> O (1:4:7.5)                                                                                  | <b>DES44.5</b> - [Ch][Cl]:PEG200:H <sub>2</sub> O (1:4:5)                                                                                    |

|                                                                                                   |       |      |    |                                                                                                   |       |      |    |
|---------------------------------------------------------------------------------------------------|-------|------|----|---------------------------------------------------------------------------------------------------|-------|------|----|
| $x_1=0.080, x_2=0.320, x_3=0.600$                                                                 |       |      |    | $x_1=0.100, x_2=0.400, x_3=0.500$                                                                 |       |      |    |
| 298.00                                                                                            | 47.98 | 0.10 | 29 | 298.00                                                                                            | 46.92 | 0.10 | 29 |
| <b>DES44.6</b> - [Ch][Cl]:PEG200:H <sub>2</sub> O (1:4:3.33)<br>$x_1=0.120, x_2=0.480, x_3=0.400$ |       |      |    | <b>DES44.7</b> - [Ch][Cl]:PEG200:H <sub>2</sub> O (1:4:2.14)<br>$x_1=0.140, x_2=0.560, x_3=0.300$ |       |      |    |
| 298.00                                                                                            | 46.37 | 0.10 | 29 | 298.00                                                                                            | 45.83 | 0.10 | 29 |
| <b>DES44.8</b> - [Ch][Cl]:PEG200:H <sub>2</sub> O (1:4:1.25)<br>$x_1=0.160, x_2=0.640, x_3=0.200$ |       |      |    | <b>DES44.9</b> - [Ch][Cl]:PEG200:H <sub>2</sub> O (1:4:0.56)<br>$x_1=0.180, x_2=0.720, x_3=0.100$ |       |      |    |
| 298.00                                                                                            | 46.37 | 0.10 | 29 | 298.00                                                                                            | 46.51 | 0.10 | 29 |
| <b>DES45.1</b> - [Ch][Cl]:PEG200:IsoOH (1:4:45)<br>$x_1=0.020, x_2=0.080, x_3=0.900$              |       |      |    | <b>DES45.2</b> - [Ch][Cl]:PEG200:IsoOH (1:4:20)<br>$x_1=0.040, x_2=0.160, x_3=0.800$              |       |      |    |
| 298.00                                                                                            | 19.19 | 0.10 | 29 | 298.00                                                                                            | 20.67 | 0.10 | 29 |
| <b>DES45.3</b> - [Ch][Cl]:PEG200:IsoOH (1:4:11.67)<br>$x_1=0.060, x_2=0.240, x_3=0.700$           |       |      |    | <b>DES45.4</b> - [Ch][Cl]:PEG200:IsoOH (1:4:7.5)<br>$x_1=0.080, x_2=0.320, x_3=0.600$             |       |      |    |
| 298.00                                                                                            | 23.09 | 0.10 | 29 | 298.00                                                                                            | 25.11 | 0.10 | 29 |
| <b>DES45.5</b> - [Ch][Cl]:PEG200:IsoOH (1:4:5)<br>$x_1=0.100, x_2=0.400, x_3=0.500$               |       |      |    | <b>DES45.6</b> - [Ch][Cl]:PEG200:IsoOH (1:4:3.33)<br>$x_1=0.120, x_2=0.480, x_3=0.400$            |       |      |    |
| 298.00                                                                                            | 28.60 | 0.10 | 29 | 298.00                                                                                            | 31.44 | 0.10 | 29 |
| <b>DES45.7</b> - [Ch][Cl]:PEG200:IsoOH (1:4:2.14)<br>$x_1=0.140, x_2=0.560, x_3=0.300$            |       |      |    | <b>DES45.8</b> - [Ch][Cl]:PEG200:IsoOH (1:4:1.25)<br>$x_1=0.160, x_2=0.640, x_3=0.200$            |       |      |    |
| 298.00                                                                                            | 33.45 | 0.10 | 29 | 298.00                                                                                            | 36.42 | 0.10 | 29 |
| <b>DES45.9</b> - [Ch][Cl]:PEG200:IsoOH (1:4:0.56)<br>$x_1=0.180, x_2=0.720, x_3=0.100$            |       |      |    | <b>DES46.1</b> - [Ch][Cl]:PEG200 (1:7)<br>$x_1=0.125, x_2=0.875, x_3=0.000$                       |       |      |    |
| 298.00                                                                                            | 40.05 | 0.10 | 29 | 298.00                                                                                            | 51.54 | 0.01 |    |
|                                                                                                   |       |      |    | 303.00                                                                                            | 50.99 | 0.01 |    |
|                                                                                                   |       |      |    | 313.00                                                                                            | 50.71 | 0.01 |    |
|                                                                                                   |       |      |    | 323.00                                                                                            | 47.24 | 0.01 | 30 |
|                                                                                                   |       |      |    | 333.00                                                                                            | 47.90 | 0.01 |    |
|                                                                                                   |       |      |    | 343.00                                                                                            | 47.46 | 0.01 |    |
|                                                                                                   |       |      |    | 353.00                                                                                            | 45.96 | 0.01 |    |
| <b>DES46.2</b> - [Ch][Cl]:PEG200 (1:6)<br>$x_1=0.143, x_2=0.857, x_3=0.000$                       |       |      |    | <b>DES46.3</b> - [Ch][Cl]:PEG200 (1:5)<br>$x_1=0.167, x_2=0.833, x_3=0.000$                       |       |      |    |
| 298.00                                                                                            | 52.26 | 0.01 |    | 298.00                                                                                            | 48.39 | 0.01 |    |
| 303.00                                                                                            | 51.05 | 0.01 |    | 303.00                                                                                            | 46.02 | 0.01 |    |
| 313.00                                                                                            | 50.82 | 0.01 |    | 313.00                                                                                            | 45.74 | 0.01 |    |
| 323.00                                                                                            | 50.99 | 0.01 | 30 | 323.00                                                                                            | 42.04 | 0.01 | 30 |
| 333.00                                                                                            | 49.66 | 0.01 |    | 333.00                                                                                            | 39.23 | 0.01 |    |
| 343.00                                                                                            | 48.61 | 0.01 |    | 343.00                                                                                            | 36.96 | 0.01 |    |
| 353.00                                                                                            | 40.83 | 0.01 |    | 353.00                                                                                            | 35.97 | 0.01 |    |
| <b>DES46.4</b> - [Ch][Cl]:PEG200 (1:4)<br>$x_1=0.200, x_2=0.800, x_3=0.000$                       |       |      |    | <b>DES47</b> - [Ch][Cl]:PEG400:FeCl <sub>3</sub> (1:4:0.1)<br>$x_1=0.196, x_2=0.784, x_3=0.020$   |       |      |    |
| 298.00                                                                                            | 55.03 | 0.01 |    | 298.00                                                                                            | 35.59 | 0.10 |    |
| 303.00                                                                                            | 52.43 | 0.01 |    | 308.00                                                                                            | 32.96 | 0.10 |    |
| 313.00                                                                                            | 48.50 | 0.01 |    | 318.00                                                                                            | 32.52 | 0.10 | 29 |
| 323.00                                                                                            | 45.96 | 0.01 | 30 | 328.00                                                                                            | 31.41 | 0.10 |    |
| 333.00                                                                                            | 46.40 | 0.01 |    | 338.00                                                                                            | 31.32 | 0.10 |    |
| 343.00                                                                                            | 44.20 | 0.01 |    |                                                                                                   |       |      |    |
| 353.00                                                                                            | 43.75 | 0.01 |    |                                                                                                   |       |      |    |
| <b>DES48</b> - [Ch][Cl]:PEG400 (1:4)<br>$x_1=0.800, x_2=0.200, x_3=0.000$                         |       |      |    | <b>DES49</b> - [Ch][Cl]:PenOH (1:3.5)<br>$x_1=0.200, x_2=0.800, x_3=0.000$                        |       |      |    |
| 298.00                                                                                            | 45.62 | 0.10 |    | 298.15                                                                                            | 47.50 | 0.17 | 26 |
| 308.00                                                                                            | 45.08 | 0.10 |    |                                                                                                   |       |      |    |
| 318.00                                                                                            | 44.39 | 0.10 | 29 |                                                                                                   |       |      |    |
| 328.00                                                                                            | 43.66 | 0.10 |    |                                                                                                   |       |      |    |
| 338.00                                                                                            | 43.12 | 0.10 |    |                                                                                                   |       |      |    |
| <b>DES50</b> - [Ch][Cl]:Ph (1:2)<br>$x_1=0.333, x_2=0.667, x_3=0.000$                             |       |      |    | <b>DES51</b> - [Ch][Cl]:TFA (1:2)<br>$x_1=0.333, x_2=0.667, x_3=0.000$                            |       |      |    |
| 298.15                                                                                            | 35.46 | 1.00 | 21 | 313.15                                                                                            | 35.90 | -    | 1  |
| <b>DES52.1</b> - [Ch][Cl]:U:H <sub>2</sub> O (1:2.32:14.25)<br>$x_1=0.057, x_2=0.132, x_3=0.811$  |       |      |    | <b>DES52.2</b> - [Ch][Cl]:U:H <sub>2</sub> O (1:2.32:5.15)<br>$x_1=0.118, x_2=0.274, x_3=0.608$   |       |      |    |
| 307.90                                                                                            | 59.58 | 0.03 |    | 307.90                                                                                            | 64.31 | 0.03 |    |
| 318.20                                                                                            | 57.79 | 0.03 |    | 318.20                                                                                            | 61.89 | 0.03 | 31 |
| 327.50                                                                                            | 55.63 | 0.03 | 31 | 327.50                                                                                            | 59.04 | 0.03 |    |
| 337.70                                                                                            | 52.84 | 0.03 |    | 337.70                                                                                            | 57.14 | 0.03 |    |
| <b>DES52.3</b> - [Ch][Cl]:U:H <sub>2</sub> O (1:2.32:1.74)<br>$x_1=0.197, x_2=0.459, x_3=0.343$   |       |      |    | <b>DES52.4</b> - [Ch][Cl]:U:H <sub>2</sub> O (1:2.32:0.08)<br>$x_1=0.294, x_2=0.683, x_3=0.024$   |       |      |    |
| 307.90                                                                                            | 69.41 | 0.03 |    | 307.90                                                                                            | 74.43 | 0.03 |    |
| 318.20                                                                                            | 66.23 | 0.03 | 31 | 318.20                                                                                            | 70.42 | 0.03 | 31 |
| 327.50                                                                                            | 63.24 | 0.03 |    | 327.50                                                                                            | 66.89 | 0.03 |    |
| 337.70                                                                                            | 60.19 | 0.03 |    | 337.70                                                                                            | 63.99 | 0.03 |    |

| <b>DES53 - [Ch][Cl]:U (1:2)</b><br>$x_1=0.333, x_2=0.667, x_3=0.000$                                                |       |      | <b>DES54 - [Ch][Cl]:Xyl:H<sub>2</sub>O (2.02:1:2.95)</b><br>$x_1=0.338, x_2=0.168, x_3=0.494$                       |       |      |
|---------------------------------------------------------------------------------------------------------------------|-------|------|---------------------------------------------------------------------------------------------------------------------|-------|------|
|                                                                                                                     |       |      | 278.15                                                                                                              | 80.68 | 0.01 |
|                                                                                                                     |       |      | 280.65                                                                                                              | 80.07 | 0.01 |
|                                                                                                                     |       |      | 283.15                                                                                                              | 79.64 | 0.01 |
|                                                                                                                     |       |      | 285.65                                                                                                              | 79.41 | 0.01 |
|                                                                                                                     |       |      | 288.15                                                                                                              | 78.82 | 0.01 |
|                                                                                                                     |       |      | 290.65                                                                                                              | 78.48 | 0.01 |
|                                                                                                                     |       |      | 293.15                                                                                                              | 78.01 | 0.01 |
|                                                                                                                     |       |      | 295.65                                                                                                              | 77.82 | 0.01 |
|                                                                                                                     |       |      | 298.15                                                                                                              | 77.41 | 0.01 |
| 293.15                                                                                                              | 57.20 | 0.20 | 300.65                                                                                                              | 77.02 | 0.01 |
| 303.15                                                                                                              | 54.90 | 0.20 | 303.15                                                                                                              | 76.64 | 0.01 |
| 313.15                                                                                                              | 52.70 | 0.20 | 305.65                                                                                                              | 76.23 | 0.01 |
| 323.15                                                                                                              | 50.40 | 0.20 | 308.15                                                                                                              | 75.85 | 0.01 |
| 333.15                                                                                                              | 48.10 | 0.20 | 310.65                                                                                                              | 75.30 | 0.01 |
| 343.15                                                                                                              | 45.90 | 0.20 | 313.15                                                                                                              | 75.00 | 0.01 |
| 353.15                                                                                                              | 43.60 | 0.20 | 315.65                                                                                                              | 74.57 | 0.01 |
| 425.00                                                                                                              | 38.70 | 0.50 | 318.15                                                                                                              | 74.19 | 0.01 |
|                                                                                                                     |       |      | 320.65                                                                                                              | 73.62 | 0.01 |
|                                                                                                                     |       |      | 323.15                                                                                                              | 73.12 | 0.01 |
|                                                                                                                     |       |      | 325.65                                                                                                              | 72.78 | 0.01 |
|                                                                                                                     |       |      | 328.15                                                                                                              | 72.41 | 0.01 |
|                                                                                                                     |       |      | 330.65                                                                                                              | 72.16 | 0.01 |
|                                                                                                                     |       |      | 333.15                                                                                                              | 71.56 | 0.01 |
|                                                                                                                     |       |      | 335.65                                                                                                              | 70.90 | 0.01 |
|                                                                                                                     |       |      | 338.15                                                                                                              | 70.36 | 0.01 |
| <b>DES55 - [DEEA][Cl]:DEG (1:3)</b><br>$x_1=0.250, x_2=0.750, x_3=0.000$                                            |       |      | <b>DES56 - [EA][Br]:Gly (1:2)</b><br>$x_1=0.333, x_2=0.667, x_3=0.000$                                              |       |      |
| 293.00                                                                                                              | 64.95 | 0.10 |                                                                                                                     |       |      |
| 303.00                                                                                                              | 61.97 | 0.10 |                                                                                                                     |       |      |
| 313.00                                                                                                              | 60.52 | 0.10 |                                                                                                                     |       |      |
| 323.00                                                                                                              | 56.00 | 0.10 | 298.15                                                                                                              | 57.60 | -    |
| 333.00                                                                                                              | 45.21 | 0.10 |                                                                                                                     |       |      |
| 343.00                                                                                                              | 37.63 | 0.10 |                                                                                                                     |       |      |
| 353.00                                                                                                              | 33.67 | 0.10 |                                                                                                                     |       |      |
| <b>DES57 - [EA][Cl]:Ace (1:1.5)</b><br>$x_1=0.400, x_2=0.600, x_3=0.000$                                            |       |      | <b>DES58 - [EA][Cl]:TFA (1:1.5)</b><br>$x_1=0.400, x_2=0.600, x_3=0.000$                                            |       |      |
| 313.15                                                                                                              | 46.30 | -    | 313.15                                                                                                              | 30.10 | -    |
| <b>DES59 - [EA][Cl]:U (1:1.5)</b><br>$x_1=0.400, x_2=0.600, x_3=0.000$                                              |       |      | <b>DES60.1 - [MPPyr][N(SO<sub>2</sub>CF<sub>3</sub>)<sub>2</sub>]:EG (1:6)</b><br>$x_1=0.143, x_2=0.857, x_3=0.000$ |       |      |
| 313.15                                                                                                              | 52.90 | -    | 298.15                                                                                                              | 38.40 | 0.01 |
| <b>DES60.2 - [MPPyr][N(SO<sub>2</sub>CF<sub>3</sub>)<sub>2</sub>]:EG (1:4)</b><br>$x_1=0.200, x_2=0.800, x_3=0.000$ |       |      | <b>DES60.3 - [MPPyr][N(SO<sub>2</sub>CF<sub>3</sub>)<sub>2</sub>]:EG (1:2)</b><br>$x_1=0.333, x_2=0.667, x_3=0.000$ |       |      |
| 298.15                                                                                                              | 38.40 | 0.01 | 298.15                                                                                                              | 38.00 | 0.01 |
| <b>DES61 - [MTP][Br]:DEG (1:4)</b><br>$x_1=0.200, x_2=0.800, x_3=0.000$                                             |       |      | <b>DES62.1 - [MTP][Br]:EG (1:4)</b><br>$x_1=0.200, x_2=0.800, x_3=0.000$                                            |       |      |
| 293.00                                                                                                              | 62.74 | 0.10 | 303.15                                                                                                              | 50.74 | 0.20 |
| 303.00                                                                                                              | 61.29 | 0.10 | 308.15                                                                                                              | 50.15 | 0.20 |
| 313.00                                                                                                              | 58.11 | 0.10 | 313.15                                                                                                              | 49.60 | 0.20 |
| 323.00                                                                                                              | 51.67 | 0.10 | 318.15                                                                                                              | 49.18 | 0.20 |
| 333.00                                                                                                              | 46.08 | 0.10 | 323.15                                                                                                              | 48.66 | 0.20 |
| 343.00                                                                                                              | 34.73 | 0.10 | 328.15                                                                                                              | 48.10 | 0.20 |
| 353.00                                                                                                              | 29.92 | 0.10 | 298.15                                                                                                              | 51.29 | 0.20 |
| <b>DES62.2 - [MTP][Br]:EG (1:2)</b><br>$x_1=0.333, x_2=0.667, x_3=0.000$                                            |       |      | <b>DES63 - [MTP][Br]:Gly (1:3)</b><br>$x_1=0.250, x_2=0.750, x_3=0.000$                                             |       |      |
| 298.15                                                                                                              | 47.51 | 0.10 | 298.15                                                                                                              | 59.35 | 0.10 |
| 303.15                                                                                                              | 47.06 | 0.10 | 303.15                                                                                                              | 58.81 | 0.10 |
| 308.15                                                                                                              | 46.57 | 0.10 | 308.15                                                                                                              | 58.20 | 0.10 |
| 313.15                                                                                                              | 46.12 | 0.10 | 313.15                                                                                                              | 57.68 | 0.10 |
| 318.15                                                                                                              | 45.59 | 0.10 | 318.15                                                                                                              | 57.06 | 0.10 |
| 323.15                                                                                                              | 45.12 | 0.10 | 323.15                                                                                                              | 56.45 | 0.10 |
| 328.15                                                                                                              | 44.64 | 0.10 | 328.15                                                                                                              | 55.95 | 0.10 |
| <b>DES64.1 - [MTP][Br]:MDEA (1:16)</b><br>$x_1=0.059, x_2=0.941, x_3=0.000$                                         |       |      | <b>DES64.2 - [MTP][Br]:MDEA (1:10)</b><br>$x_1=0.091, x_2=0.909, x_3=0.000$                                         |       |      |
| 298.15                                                                                                              | 41.99 | 0.03 | 298.15                                                                                                              | 42.80 | 0.03 |
| 303.15                                                                                                              | 41.74 | 0.03 | 303.15                                                                                                              | 42.50 | 0.03 |
| 313.15                                                                                                              | 41.20 | 0.03 | 313.15                                                                                                              | 42.00 | 0.03 |
| 323.15                                                                                                              | 40.71 | 0.03 | 323.15                                                                                                              | 41.53 | 0.03 |
| 333.15                                                                                                              | 40.15 | 0.03 | 333.15                                                                                                              | 41.06 | 0.03 |

|                                                                              |       |      |    |                                                                              |       |      |    |
|------------------------------------------------------------------------------|-------|------|----|------------------------------------------------------------------------------|-------|------|----|
| 343.15                                                                       | 39.71 | 0.03 |    | 343.15                                                                       | 40.58 | 0.03 |    |
| 353.15                                                                       | 39.19 | 0.03 |    | 353.15                                                                       | 40.10 | 0.03 |    |
| <b>DES64.3 - [MTP][Br]:MDEA (1:7)</b><br>$x_1=0.125, x_2=0.875, x_3=0.000$   |       |      |    | <b>DES65.1 - [MTP][Br]:MEA (1:8)</b><br>$x_1=0.110, x_2=0.890, x_3=0.000$    |       |      |    |
| 298.15                                                                       | 43.06 | 0.03 |    | 298.15                                                                       | 50.30 | 0.10 |    |
| 303.15                                                                       | 42.87 | 0.03 |    | 308.15                                                                       | 49.50 | 0.10 |    |
| 313.15                                                                       | 42.48 | 0.03 |    | 318.15                                                                       | 48.60 | 0.10 |    |
| 323.15                                                                       | 42.07 | 0.03 | 3  | 328.15                                                                       | 47.80 | 0.10 | 24 |
| 333.15                                                                       | 41.64 | 0.03 |    | 338.15                                                                       | 46.90 | 0.10 |    |
| 343.15                                                                       | 41.31 | 0.03 |    | 348.15                                                                       | 46.20 | 0.10 |    |
| 353.15                                                                       | 40.87 | 0.03 |    | 358.15                                                                       | 45.30 | 0.10 |    |
| <b>DES65.2 - [MTP][Br]:MEA (1:7)</b><br>$x_1=0.130, x_2=0.870, x_3=0.000$    |       |      |    | <b>DES65.3 - [MTP][Br]:MEA (1:6)</b><br>$x_1=0.140, x_2=0.860, x_3=0.000$    |       |      |    |
| 298.15                                                                       | 50.20 | 0.10 |    | 298.15                                                                       | 49.30 | 0.10 |    |
| 308.15                                                                       | 49.30 | 0.10 |    | 308.15                                                                       | 48.40 | 0.10 |    |
| 318.15                                                                       | 48.20 | 0.10 |    | 318.15                                                                       | 47.60 | 0.10 |    |
| 328.15                                                                       | 47.20 | 0.10 | 24 | 328.15                                                                       | 46.70 | 0.10 | 24 |
| 338.15                                                                       | 46.30 | 0.10 |    | 338.15                                                                       | 45.90 | 0.10 |    |
| 348.15                                                                       | 45.30 | 0.10 |    | 348.15                                                                       | 44.90 | 0.10 |    |
| 358.15                                                                       | 44.40 | 0.10 |    | 358.15                                                                       | 44.20 | 0.10 |    |
| <b>DES65.4 - [MTP][Br]:MEA (1:5)</b><br>$x_1=0.160, x_2=0.840, x_3=0.000$    |       |      |    | <b>DES66 - [MTP][Br]:TEG (1:5.25)</b><br>$x_1=0.160, x_2=0.840, x_3=0.000$   |       |      |    |
| 298.15                                                                       | 48.90 | 0.10 |    | 303.15                                                                       | 49.27 | 0.20 |    |
| 308.15                                                                       | 48.00 | 0.10 |    | 308.15                                                                       | 48.85 | 0.20 |    |
| 318.15                                                                       | 47.20 | 0.10 |    | 313.15                                                                       | 48.40 | 0.20 |    |
| 328.15                                                                       | 46.40 | 0.10 | 24 | 318.15                                                                       | 48.01 | 0.20 | 33 |
| 338.15                                                                       | 45.60 | 0.10 |    | 323.15                                                                       | 47.49 | 0.20 |    |
| 348.15                                                                       | 44.80 | 0.10 |    | 328.15                                                                       | 47.03 | 0.20 |    |
| 358.15                                                                       | 44.00 | 0.10 |    | 298.15                                                                       | 49.85 | 0.20 |    |
| <b>DES67.1 - [N-DEEA][Cl]:EG (1:3)</b><br>$x_1=0.250, x_2=0.750, x_3=0.000$  |       |      |    | <b>DES67.2 - [N-DEEA][Cl]:EG (1:2)</b><br>$x_1=0.333, x_2=0.667, x_3=0.000$  |       |      |    |
| 303.15                                                                       | 47.15 | 0.20 |    | 298.15                                                                       | 51.29 | 0.10 |    |
| 308.15                                                                       | 46.53 | 0.20 |    | 303.15                                                                       | 50.74 | 0.10 |    |
| 313.15                                                                       | 46.04 | 0.20 |    | 308.15                                                                       | 50.17 | 0.10 |    |
| 318.15                                                                       | 45.55 | 0.20 | 18 | 313.15                                                                       | 49.63 | 0.10 | 18 |
| 323.15                                                                       | 44.99 | 0.20 |    | 318.15                                                                       | 49.14 | 0.10 |    |
| 328.15                                                                       | 44.57 | 0.20 |    | 323.15                                                                       | 48.67 | 0.10 |    |
| 298.15                                                                       | 47.51 | 0.20 |    | 328.15                                                                       | 48.12 | 0.10 |    |
| <b>DES68.1 - [N-DEEA][Cl]:Gly (1:4)</b><br>$x_1=0.200, x_2=0.800, x_3=0.000$ |       |      |    | <b>DES68.2 - [N-DEEA][Cl]:Gly (1:2)</b><br>$x_1=0.333, x_2=0.667, x_3=0.000$ |       |      |    |
| 303.15                                                                       | 58.75 | 0.20 |    | 298.15                                                                       | 58.94 | 0.10 |    |
| 308.15                                                                       | 58.13 | 0.20 |    | 303.15                                                                       | 58.33 | 0.10 |    |
| 313.15                                                                       | 57.58 | 0.20 |    | 308.15                                                                       | 57.63 | 0.10 |    |
| 318.15                                                                       | 56.96 | 0.20 | 18 | 313.15                                                                       | 56.99 | 0.10 | 18 |
| 323.15                                                                       | 56.35 | 0.20 |    | 318.15                                                                       | 56.39 | 0.10 |    |
| 328.15                                                                       | 55.92 | 0.20 |    | 323.15                                                                       | 55.73 | 0.10 |    |
| 298.15                                                                       | 59.35 | 0.20 |    | 328.15                                                                       | 55.16 | 0.10 |    |
| <b>DES69 - [N-DEEA][Cl]:TFA (1:2)</b><br>$x_1=0.333, x_2=0.667, x_3=0.000$   |       |      |    | <b>DES70 - [PA][Br]:Gly (1:2)</b><br>$x_1=0.333, x_2=0.667, x_3=0.000$       |       |      |    |
| 303.15                                                                       | 39.78 | 0.20 |    |                                                                              |       |      |    |
| 308.15                                                                       | 39.28 | 0.20 |    |                                                                              |       |      |    |
| 313.15                                                                       | 38.79 | 0.20 |    |                                                                              |       |      |    |
| 318.15                                                                       | 38.36 | 0.20 | 33 | 298.15                                                                       | 51.70 | -    | 4  |
| 323.15                                                                       | 37.88 | 0.20 |    |                                                                              |       |      |    |
| 328.15                                                                       | 37.51 | 0.20 |    |                                                                              |       |      |    |
| 298.15                                                                       | 40.27 | 0.20 |    |                                                                              |       |      |    |
| <b>DES71 - [TBA][Br]:AA (1:1)</b><br>$x_1=0.500, x_2=0.500, x_3=0.000$       |       |      |    | <b>DES72 - [TBA][Br]:DEG (1:2)</b><br>$x_1=0.333, x_2=0.667, x_3=0.000$      |       |      |    |
|                                                                              |       |      |    | 293.00                                                                       | 53.50 | 0.10 |    |
|                                                                              |       |      |    | 303.00                                                                       | 51.77 | 0.10 |    |
|                                                                              |       |      |    | 313.00                                                                       | 49.64 | 0.10 |    |
| 298.15                                                                       | 34.50 | 0.03 | 34 | 323.00                                                                       | 41.94 | 0.10 | 5  |
|                                                                              |       |      |    | 333.00                                                                       | 36.56 | 0.10 |    |
|                                                                              |       |      |    | 343.00                                                                       | 35.50 | 0.10 |    |
|                                                                              |       |      |    | 353.00                                                                       | 32.23 | 0.10 |    |
| <b>DES73 - [TBA][Br]:EG (1:2)</b><br>$x_1=0.333, x_2=0.667, x_3=0.000$       |       |      |    | <b>DES74 - [TBA][Br]:FA (1:1)</b><br>$x_1=0.500, x_2=0.500, x_3=0.000$       |       |      |    |
| 298.15                                                                       | 53.31 | 0.10 | 6  | 298.15                                                                       | 37.20 | 0.03 | 34 |
| <b>DES75 - [TBA][Br]:MalA (1:1)</b><br>$x_1=0.500, x_2=0.500, x_3=0.000$     |       |      |    | <b>DES76.1 - [TBA][Br]:MEA (1:6)</b><br>$x_1=0.140, x_2=0.860, x_3=0.000$    |       |      |    |
| 298.15                                                                       | 38.20 | 0.03 | 34 | 298.15                                                                       | 36.10 | 0.10 | 24 |

|                                                                                        |                                                                                           |       |      |        |
|----------------------------------------------------------------------------------------|-------------------------------------------------------------------------------------------|-------|------|--------|
|                                                                                        | 308.15                                                                                    | 35.70 | 0.10 |        |
|                                                                                        | 318.15                                                                                    | 35.40 | 0.10 |        |
|                                                                                        | 328.15                                                                                    | 35.10 | 0.10 |        |
|                                                                                        | 338.15                                                                                    | 34.70 | 0.10 |        |
|                                                                                        | 348.15                                                                                    | 34.40 | 0.10 |        |
|                                                                                        | 358.15                                                                                    | 34.10 | 0.10 |        |
| <b>DES76.2</b> - [TBA][Br]:MEA (1:5)<br>$x_1=0.160, x_2=0.840, x_3=0.000$              | <b>DES76.3</b> - [TBA][Br]:MEA (1:4)<br>$x_1=0.200, x_2=0.800, x_3=0.000$                 |       |      |        |
| 298.15                                                                                 | 36.00                                                                                     | 0.10  |      | 298.15 |
| 308.15                                                                                 | 35.60                                                                                     | 0.10  |      | 308.15 |
| 318.15                                                                                 | 35.20                                                                                     | 0.10  |      | 318.15 |
| 328.15                                                                                 | 34.90                                                                                     | 0.10  | 24   | 328.15 |
| 338.15                                                                                 | 34.60                                                                                     | 0.10  |      | 338.15 |
| 348.15                                                                                 | 34.20                                                                                     | 0.10  |      | 348.15 |
| 358.15                                                                                 | 33.90                                                                                     | 0.10  |      | 358.15 |
| <b>DES76.4</b> - [TBA][Br]:MEA (1:3)<br>$x_1=0.250, x_2=0.750, x_3=0.000$              | <b>DES77</b> - [TBA][Br]:OA (1:1)<br>$x_1=0.500, x_2=0.500, x_3=0.000$                    |       |      |        |
| 298.15                                                                                 | 35.70                                                                                     | 0.10  |      |        |
| 308.15                                                                                 | 35.30                                                                                     | 0.10  |      |        |
| 318.15                                                                                 | 34.80                                                                                     | 0.10  |      |        |
| 328.15                                                                                 | 34.50                                                                                     | 0.10  | 24   | 298.15 |
| 338.15                                                                                 | 34.00                                                                                     | 0.10  |      | 42.70  |
| 348.15                                                                                 | 33.60                                                                                     | 0.10  |      | 0.03   |
| 358.15                                                                                 | 33.20                                                                                     | 0.10  |      |        |
| <b>DES78</b> - [TBA][Br]:PA (1:1)<br>$x_1=0.500, x_2=0.500, x_3=0.000$                 | <b>DES79.1</b> - [TBA][Cl]:Arg (6:1)<br>$x_1=0.857, x_2=0.143, x_3=0.000$                 |       |      |        |
|                                                                                        |                                                                                           |       |      | 313.15 |
|                                                                                        |                                                                                           |       |      | 323.15 |
| 298.15                                                                                 | 32.40                                                                                     | 0.03  | 34   | 333.15 |
|                                                                                        |                                                                                           |       |      | 343.15 |
|                                                                                        |                                                                                           |       |      | 353.15 |
| <b>DES79.2</b> - [TBA][Cl]:Arg (7:1)<br>$x_1=0.857, x_2=0.125, x_3=0.000$              | <b>DES79.3</b> - [TBA][Cl]:Arg (8:1)<br>$x_1=0.889, x_2=0.111, x_3=0.000$                 |       |      |        |
| 313.15                                                                                 | 38.20                                                                                     | 0.10  |      | 313.15 |
| 323.15                                                                                 | 37.90                                                                                     | 0.10  |      | 323.15 |
| 333.15                                                                                 | 37.20                                                                                     | 0.10  | 35   | 333.15 |
| 343.15                                                                                 | 36.50                                                                                     | 0.10  |      | 343.15 |
| 353.15                                                                                 | 35.80                                                                                     | 0.10  |      | 353.15 |
| <b>DES80.1</b> - [TBA][Cl]:AspA (9:1)<br>$x_1=0.900, x_2=0.100, x_3=0.000$             | <b>DES80.2</b> - [TBA][Cl]:AspA (10:1)<br>$x_1=0.909, x_2=0.091, x_3=0.000$               |       |      |        |
| 313.15                                                                                 | 38.50                                                                                     | 0.10  |      | 313.15 |
| 323.15                                                                                 | 37.50                                                                                     | 0.10  |      | 323.15 |
| 333.15                                                                                 | 36.60                                                                                     | 0.10  | 35   | 333.15 |
| 343.15                                                                                 | 35.10                                                                                     | 0.10  |      | 343.15 |
| 353.15                                                                                 | 33.90                                                                                     | 0.10  |      | 353.15 |
| <b>DES80.3</b> - [TBA][Cl]:AspA (11:1)<br>$x_1=0.917, x_2=0.083, x_3=0.000$            | <b>DES81.1</b> - [TBA][Cl]:GluA (8:1)<br>$x_1=0.889, x_2=0.111, x_3=0.000$                |       |      |        |
| 313.15                                                                                 | 43.40                                                                                     | 0.10  |      | 313.15 |
| 323.15                                                                                 | 41.10                                                                                     | 0.10  |      | 323.15 |
| 333.15                                                                                 | 38.60                                                                                     | 0.10  | 35   | 333.15 |
| 343.15                                                                                 | 37.10                                                                                     | 0.10  |      | 343.15 |
| 353.15                                                                                 | 5.20                                                                                      | 0.10  |      | 353.15 |
| <b>DES81.2</b> - [TBA][Cl]:GluA (9:1)<br>$x_1=0.900, x_2=0.100, x_3=0.000$             | <b>DES81.3</b> - [TBA][Cl]:GluA (10:1)<br>$x_1=0.909, x_2=0.091, x_3=0.000$               |       |      |        |
| 313.15                                                                                 | 33.60                                                                                     | 0.10  |      | 313.15 |
| 323.15                                                                                 | 33.10                                                                                     | 0.10  |      | 323.15 |
| 333.15                                                                                 | 32.40                                                                                     | 0.10  | 35   | 333.15 |
| 343.15                                                                                 | 31.50                                                                                     | 0.10  |      | 343.15 |
| 353.15                                                                                 | 31.20                                                                                     | 0.10  |      | 353.15 |
| <b>DES82</b> - [TBA][Cl]:Met (9:1)<br>$x_1=0.900, x_2=0.100, x_3=0.000$                | <b>DES83</b> - [TBA][HSO <sub>4</sub> ]:BA (1:1)<br>$x_1=0.500, x_2=0.500, x_3=0.000$     |       |      |        |
|                                                                                        |                                                                                           |       |      | 333.15 |
|                                                                                        |                                                                                           |       |      | 338.15 |
| 313.15                                                                                 | 41.80                                                                                     | 0.10  | 35   | 343.15 |
|                                                                                        |                                                                                           |       |      | 348.15 |
|                                                                                        |                                                                                           |       |      | 353.15 |
| <b>DES84</b> - [TBA][HSO <sub>4</sub> ]:DGA (1:1)<br>$x_1=0.500, x_2=0.500, x_3=0.000$ | <b>DES85</b> - [TBA][HSO <sub>4</sub> ]:Nin (1:0.75)<br>$x_1=0.571, x_2=0.429, x_3=0.000$ |       |      |        |
| 303.15                                                                                 | 43.89                                                                                     | 0.10  |      | 308.15 |
| 313.15                                                                                 | 43.64                                                                                     | 0.10  | 12   | 313.15 |
| 323.15                                                                                 | 43.39                                                                                     | 0.10  |      | 318.15 |
|                                                                                        |                                                                                           |       |      | 43.23  |
|                                                                                        |                                                                                           |       |      | 42.30  |
|                                                                                        |                                                                                           |       |      | 41.20  |

|                                                                           |       |      |    |                                                                                       |       |      |    |
|---------------------------------------------------------------------------|-------|------|----|---------------------------------------------------------------------------------------|-------|------|----|
| 333.15                                                                    | 43.14 | 0.10 |    | 323.15                                                                                | 40.20 | 0.20 |    |
| 343.15                                                                    | 42.82 | 0.10 |    | 328.15                                                                                | 39.21 | 0.20 |    |
|                                                                           |       |      |    | 333.15                                                                                | 38.18 | 0.20 |    |
| <b>DES86</b> - [TEA][Br]:BA (1:1)<br>$x_1=0.500, x_2=0.500, x_3=0.000$    |       |      |    | <b>DES87.1</b> - [TPA][Br]:EG (1:5)<br>$x_1=0.167, x_2=0.833, x_3=0.000$              |       |      |    |
| 333.15                                                                    | 52.59 | 0.20 |    |                                                                                       |       |      |    |
| 338.15                                                                    | 51.51 | 0.20 |    |                                                                                       |       |      |    |
| 343.15                                                                    | 50.43 | 0.20 |    | 303.15                                                                                | 46.99 | -    |    |
| 348.15                                                                    | 49.34 | 0.20 |    | 313.15                                                                                | 45.79 | -    |    |
| 353.15                                                                    | 48.22 | 0.20 | 8  | 323.15                                                                                | 45.09 | -    | 36 |
| 333.15                                                                    | 46.60 | 0.20 |    | 333.15                                                                                | 44.30 | -    |    |
| 338.15                                                                    | 45.51 | 0.20 |    | 343.15                                                                                | 43.40 | -    |    |
| 343.15                                                                    | 44.42 | 0.20 |    | 353.15                                                                                | 42.51 | -    |    |
| 348.15                                                                    | 43.34 | 0.20 |    |                                                                                       |       |      |    |
| 353.15                                                                    | 42.11 | 0.20 |    |                                                                                       |       |      |    |
| <b>DES87.2</b> - [TPA][Br]:EG (1:4)<br>$x_1=0.200, x_2=0.800, x_3=0.000$  |       |      |    | <b>DES87.3</b> - [TPA][Br]:EG (1:3)<br>$x_1=0.250, x_2=0.750, x_3=0.000$              |       |      |    |
| 303.15                                                                    | 46.80 | -    |    | 303.15                                                                                | 46.27 | -    |    |
| 313.15                                                                    | 45.47 | -    |    | 313.15                                                                                | 45.20 | -    |    |
| 323.15                                                                    | 44.80 | -    | 36 | 323.15                                                                                | 44.39 | -    | 36 |
| 333.15                                                                    | 44.01 | -    |    | 333.15                                                                                | 43.59 | -    |    |
| 343.15                                                                    | 43.20 | -    |    | 343.15                                                                                | 42.90 | -    |    |
| 353.15                                                                    | 42.21 | -    |    | 353.15                                                                                | 41.91 | -    |    |
| <b>DES88.1</b> - [TPA][Br]:Gly (1:4)<br>$x_1=0.200, x_2=0.800, x_3=0.000$ |       |      |    | <b>DES88.2</b> - [TPA][Br]:Gly (1:3)<br>$x_1=0.250, x_2=0.750, x_3=0.000$             |       |      |    |
| 303.15                                                                    | 53.15 | -    |    | 303.15                                                                                | 52.77 | -    |    |
| 313.15                                                                    | 52.77 | -    |    | 313.15                                                                                | 51.89 | -    |    |
| 323.15                                                                    | 51.69 | -    | 36 | 323.15                                                                                | 50.69 | -    | 36 |
| 333.15                                                                    | 50.66 | -    |    | 333.15                                                                                | 49.94 | -    |    |
| 343.15                                                                    | 49.76 | -    |    | 343.15                                                                                | 48.96 | -    |    |
| 353.15                                                                    | 48.87 | -    |    | 353.15                                                                                | 48.50 | -    |    |
| <b>DES88.3</b> - [TPA][Br]:Gly (1:2)<br>$x_1=0.333, x_2=0.667, x_3=0.000$ |       |      |    | <b>DES89.1</b> - [TPA][Br]:TEG (1:4)<br>$x_1=0.200, x_2=0.800, x_3=0.000$             |       |      |    |
| 303.15                                                                    | 50.87 | -    |    | 303.15                                                                                | 45.96 | -    |    |
| 313.15                                                                    | 50.25 | -    |    | 313.15                                                                                | 44.66 | -    |    |
| 323.15                                                                    | 48.67 | -    | 36 | 323.15                                                                                | 43.96 | -    | 36 |
| 333.15                                                                    | 47.89 | -    |    | 333.15                                                                                | 43.58 | -    |    |
| 343.15                                                                    | 46.65 | -    |    | 343.15                                                                                | 43.18 | -    |    |
| 353.15                                                                    | 45.77 | -    |    | 353.15                                                                                | 42.28 | -    |    |
| <b>DES89.2</b> - [TPA][Br]:TEG (1:3)<br>$x_1=0.250, x_2=0.750, x_3=0.000$ |       |      |    | <b>DES89.3</b> - [TPA][Br]:TEG (1:2.5)<br>$x_1=0.286, x_2=0.714, x_3=0.000$           |       |      |    |
|                                                                           |       |      |    | 303.15                                                                                | 46.55 | -    |    |
| 323.15                                                                    | 44.28 | -    |    | 313.15                                                                                | 45.59 | -    |    |
| 333.15                                                                    | 43.59 | -    | 36 | 323.15                                                                                | 44.64 | -    | 36 |
| 343.15                                                                    | 42.87 | -    |    | 333.15                                                                                | 43.86 | -    |    |
| 353.15                                                                    | 42.19 | -    |    | 343.15                                                                                | 42.78 | -    |    |
|                                                                           |       |      |    | 353.15                                                                                | 42.07 | -    |    |
| <b>DES90</b> - Bet:LacA (1:2)<br>$x_1=0.333, x_2=0.667, x_3=0.000$        |       |      |    | <b>DES91</b> - Glu:CA:H <sub>2</sub> O (1:1:6.5)<br>$x_1=0.118, x_2=0.118, x_3=0.765$ |       |      |    |
|                                                                           |       |      |    | 288.15                                                                                | 71.30 | 0.01 |    |
|                                                                           |       |      |    | 290.65                                                                                | 70.70 | 0.01 |    |
|                                                                           |       |      |    | 293.15                                                                                | 70.40 | 0.01 |    |
|                                                                           |       |      |    | 295.65                                                                                | 69.90 | 0.01 |    |
|                                                                           |       |      |    | 298.15                                                                                | 69.30 | 0.01 |    |
|                                                                           |       |      |    | 300.65                                                                                | 69.00 | 0.01 |    |
|                                                                           |       |      |    | 303.15                                                                                | 68.40 | 0.01 |    |
|                                                                           |       |      |    | 305.65                                                                                | 68.00 | 0.01 |    |
| 293.15                                                                    | 46.30 | 0.10 |    | 308.15                                                                                | 67.50 | 0.01 |    |
| 303.15                                                                    | 46.00 | 0.10 |    | 310.65                                                                                | 67.10 | 0.01 |    |
| 313.15                                                                    | 45.40 | 0.10 | 37 | 313.15                                                                                | 66.80 | 0.01 | 16 |
| 323.15                                                                    | 44.50 | 0.10 |    | 315.65                                                                                | 66.40 | 0.01 |    |
| 333.15                                                                    | 42.90 | 0.10 |    | 318.15                                                                                | 65.90 | 0.01 |    |
|                                                                           |       |      |    | 320.65                                                                                | 65.50 | 0.01 |    |
|                                                                           |       |      |    | 323.15                                                                                | 65.10 | 0.01 |    |
|                                                                           |       |      |    | 325.65                                                                                | 64.60 | 0.01 |    |
|                                                                           |       |      |    | 328.15                                                                                | 64.00 | 0.01 |    |
|                                                                           |       |      |    | 330.65                                                                                | 63.60 | 0.01 |    |
|                                                                           |       |      |    | 333.15                                                                                | 63.20 | 0.01 |    |
|                                                                           |       |      |    | 335.65                                                                                | 62.80 | 0.01 |    |
|                                                                           |       |      |    | 338.15                                                                                | 62.30 | 0.01 |    |
| <b>DES92.1</b> - Mat:Pae (3:7)<br>$x_1=0.300, x_2=0.700, x_3=0.000$       |       |      |    | <b>DES92.2</b> - Mat:Pae (4:6)<br>$x_1=0.400, x_2=0.600, x_3=0.000$                   |       |      |    |

|                                                                              |       |      |    |                                                                              |       |      |    |
|------------------------------------------------------------------------------|-------|------|----|------------------------------------------------------------------------------|-------|------|----|
| 303.15                                                                       | 42.14 | 0.10 |    | 303.15                                                                       | 43.15 | 0.10 |    |
| 308.15                                                                       | 41.62 | 0.10 |    | 308.15                                                                       | 42.65 | 0.10 |    |
| 313.15                                                                       | 40.89 | 0.10 |    | 313.15                                                                       | 42.08 | 0.10 |    |
| 318.15                                                                       | 40.37 | 0.10 |    | 318.15                                                                       | 41.49 | 0.10 |    |
| 323.15                                                                       | 39.92 | 0.10 | 38 | 323.15                                                                       | 40.89 | 0.10 | 38 |
| 328.15                                                                       | 39.44 | 0.10 |    | 328.15                                                                       | 40.34 | 0.10 |    |
| 333.15                                                                       | 38.81 | 0.10 |    | 333.15                                                                       | 39.85 | 0.10 |    |
| 338.15                                                                       | 38.38 | 0.10 |    | 338.15                                                                       | 39.30 | 0.10 |    |
| 343.15                                                                       | 37.88 | 0.10 |    | 343.15                                                                       | 38.80 | 0.10 |    |
| <b>DES92.3 - Mat:Pae (5:5)</b><br>$x_1=0.500, x_2=0.500, x_3=0.000$          |       |      |    | <b>DES93 - Men:bor (7:3)</b><br>$x_1=0.875, x_2=0.125, x_3=0.000$            |       |      |    |
| 303.15                                                                       | 43.36 | 0.10 |    |                                                                              |       |      |    |
| 308.15                                                                       | 42.96 | 0.10 |    |                                                                              |       |      |    |
| 313.15                                                                       | 42.40 | 0.10 |    |                                                                              |       |      |    |
| 318.15                                                                       | 41.92 | 0.10 |    | 298.15                                                                       | 29.04 | 0.03 |    |
| 323.15                                                                       | 41.53 | 0.10 | 38 | 298.15                                                                       | 28.90 | 0.51 | 39 |
| 328.15                                                                       | 41.01 | 0.10 |    | 298.15                                                                       | 28.10 | 0.31 |    |
| 333.15                                                                       | 40.63 | 0.10 |    | 298.15                                                                       | 27.50 | 0.61 |    |
| 338.15                                                                       | 40.21 | 0.10 |    |                                                                              |       |      |    |
| 343.15                                                                       | 39.79 | 0.10 |    |                                                                              |       |      |    |
| <b>DES94 - Men:Cam (3:2)</b><br>$x_1=0.600, x_2=0.400, x_3=0.000$            |       |      |    | <b>DES95 - Men:CapA (1:1)</b><br>$x_1=0.500, x_2=0.500, x_3=0.000$           |       |      |    |
| 298.15                                                                       | 29.41 | 0.08 | 39 | 298.15                                                                       | 28.04 | -    | 40 |
| <b>DES96.1 - Men:OcA (3:1)</b><br>$x_1=0.750, x_2=0.250, x_3=0.000$          |       |      |    | <b>DES96.2 - Men:OcA (2:1)</b><br>$x_1=0.667, x_2=0.333, x_3=0.000$          |       |      |    |
| 298.20                                                                       | 23.77 | 1.50 |    | 298.24                                                                       | 20.94 | 1.50 |    |
| 303.88                                                                       | 23.00 | 1.50 |    | 303.77                                                                       | 20.53 | 1.50 |    |
| 308.78                                                                       | 22.27 | 1.50 |    | 308.75                                                                       | 20.24 | 1.50 |    |
| 314.39                                                                       | 21.81 | 1.50 |    | 314.26                                                                       | 19.94 | 1.50 |    |
| 318.90                                                                       | 21.15 | 1.50 | 41 | 318.81                                                                       | 19.70 | 1.50 | 41 |
| 323.61                                                                       | 20.72 | 1.50 |    | 323.52                                                                       | 19.52 | 1.50 |    |
| 328.11                                                                       | 20.22 | 1.50 |    | 328.48                                                                       | 19.19 | 1.50 |    |
| 332.70                                                                       | 19.65 | 1.50 |    | 333.27                                                                       | 18.98 | 1.50 |    |
| <b>DES96.3 - Men:OcA (1:1)</b><br>$x_1=0.500, x_2=0.500, x_3=0.000$          |       |      |    | <b>DES96.4 - Men:OcA (1:2)</b><br>$x_1=0.333, x_2=0.667, x_3=0.000$          |       |      |    |
| 298.11                                                                       | 26.67 | 1.50 |    | 298.00                                                                       | 25.72 | 1.50 |    |
| 303.04                                                                       | 25.67 | 1.50 |    | 303.69                                                                       | 24.84 | 1.50 |    |
| 307.73                                                                       | 24.67 | 1.50 |    | 308.53                                                                       | 24.25 | 1.50 |    |
| 313.35                                                                       | 23.58 | 1.50 | 41 | 313.17                                                                       | 23.90 | 1.50 | 41 |
| 318.12                                                                       | 22.74 | 1.50 |    | 318.42                                                                       | 23.36 | 1.50 |    |
| 322.97                                                                       | 21.75 | 1.50 |    | 322.96                                                                       | 22.93 | 1.50 |    |
| 328.35                                                                       | 20.44 | 1.50 |    | 328.41                                                                       | 22.47 | 1.50 |    |
| 332.97                                                                       | 19.47 | 1.50 |    | 332.78                                                                       | 21.79 | 1.50 |    |
| <b>DES96.5 - Men:OcA (1:3)</b><br>$x_1=0.250, x_2=0.750, x_3=0.000$          |       |      |    | <b>DES97.1 - PDA:1,4-ButOH (1:0.04)</b><br>$x_1=0.959, x_2=0.042, x_3=0.000$ |       |      |    |
| 298.16                                                                       | 23.32 | 1.50 |    | 293.15                                                                       | 41.82 | 0.01 |    |
| 303.85                                                                       | 22.25 | 1.50 |    | 298.15                                                                       | 41.53 | 0.01 |    |
| 308.73                                                                       | 21.65 | 1.50 |    | 303.15                                                                       | 40.74 | 0.01 | 42 |
| 314.11                                                                       | 21.16 | 1.50 | 41 | 308.15                                                                       | 40.22 | 0.01 |    |
| 318.88                                                                       | 20.56 | 1.50 |    | 313.15                                                                       | 39.58 | 0.01 |    |
| 323.58                                                                       | 20.10 | 1.50 |    | 318.15                                                                       | 38.98 | 0.01 |    |
| 328.93                                                                       | 19.73 | 1.50 |    |                                                                              |       |      |    |
| 333.38                                                                       | 19.41 | 1.50 |    |                                                                              |       |      |    |
| <b>DES97.2 - PDA:1,4-ButOH (1:0.09)</b><br>$x_1=0.916, x_2=0.084, x_3=0.000$ |       |      |    | <b>DES97.3 - PDA:1,4-ButOH (1:0.15)</b><br>$x_1=0.873, x_2=0.127, x_3=0.000$ |       |      |    |
| 293.15                                                                       | 42.26 | 0.01 |    | 293.15                                                                       | 42.85 | 0.01 |    |
| 298.15                                                                       | 41.76 | 0.01 |    | 298.15                                                                       | 42.31 | 0.01 |    |
| 303.15                                                                       | 41.00 | 0.01 | 42 | 303.15                                                                       | 41.48 | 0.01 | 42 |
| 308.15                                                                       | 40.55 | 0.01 |    | 308.15                                                                       | 41.07 | 0.01 |    |
| 313.15                                                                       | 40.06 | 0.01 |    | 313.15                                                                       | 40.57 | 0.01 |    |
| 318.15                                                                       | 39.70 | 0.01 |    | 318.15                                                                       | 40.06 | 0.01 |    |
| <b>DES97.4 - PDA:1,4-ButOH (1:0.21)</b><br>$x_1=0.830, x_2=0.171, x_3=0.000$ |       |      |    | <b>DES97.5 - PDA:1,4-ButOH (1:0.27)</b><br>$x_1=0.785, x_2=0.215, x_3=0.000$ |       |      |    |
| 293.15                                                                       | 43.13 | 0.01 |    | 293.15                                                                       | 43.57 | 0.01 |    |
| 298.15                                                                       | 42.76 | 0.01 |    | 298.15                                                                       | 43.33 | 0.01 |    |
| 303.15                                                                       | 41.94 | 0.01 | 42 | 303.15                                                                       | 42.51 | 0.01 | 42 |
| 308.15                                                                       | 41.51 | 0.01 |    | 308.15                                                                       | 42.12 | 0.01 |    |
| 313.15                                                                       | 41.13 | 0.01 |    | 313.15                                                                       | 41.77 | 0.01 |    |
| 318.15                                                                       | 40.65 | 0.01 |    | 318.15                                                                       | 41.29 | 0.01 |    |
| <b>DES97.6 - PDA:1,4-ButOH (1:0.35)</b><br>$x_1=0.739, x_2=0.261, x_3=0.000$ |       |      |    | <b>DES97.7 - PDA:1,4-ButOH (1:0.44)</b><br>$x_1=0.693, x_2=0.307, x_3=0.000$ |       |      |    |
| 293.15                                                                       | 44.12 | 0.01 | 42 | 293.15                                                                       | 44.60 | 0.01 | 42 |



|                                                                                       |       |      |    |                                                                                      |       |      |    |
|---------------------------------------------------------------------------------------|-------|------|----|--------------------------------------------------------------------------------------|-------|------|----|
| 298.15                                                                                | 43.95 | 0.01 |    | 298.15                                                                               | 44.23 | 0.01 |    |
| 303.15                                                                                | 42.99 | 0.01 |    | 303.15                                                                               | 43.45 | 0.01 |    |
| 308.15                                                                                | 42.66 | 0.01 |    | 308.15                                                                               | 43.13 | 0.01 |    |
| 313.15                                                                                | 42.14 | 0.01 |    | 313.15                                                                               | 42.70 | 0.01 |    |
| 318.15                                                                                | 41.79 | 0.01 |    | 318.15                                                                               | 42.38 | 0.01 |    |
| <b>DES97.8</b> - PDA:1,4-ButOH (1:0.55)<br>$x_1=0.646, x_2=0.354, x_3=0.000$          |       |      |    | <b>DES97.9</b> - PDA:1,4-ButOH (1:0.67)<br>$x_1=0.598, x_2=0.402, x_3=0.000$         |       |      |    |
| 293.15                                                                                | 45.26 | 0.01 |    | 293.15                                                                               | 45.67 | 0.01 |    |
| 298.15                                                                                | 44.78 | 0.01 |    | 298.15                                                                               | 45.28 | 0.01 |    |
| 303.15                                                                                | 44.02 | 0.01 | 42 | 303.15                                                                               | 44.45 | 0.01 | 42 |
| 308.15                                                                                | 43.56 | 0.01 |    | 308.15                                                                               | 44.20 | 0.01 |    |
| 313.15                                                                                | 43.20 | 0.01 |    | 313.15                                                                               | 43.69 | 0.01 |    |
| 318.15                                                                                | 42.90 | 0.01 |    | 318.15                                                                               | 43.35 | 0.01 |    |
| <b>DES97.10</b> - PDA:1,4-ButOH (1:0.82)<br>$x_1=0.549, x_2=0.451, x_3=0.000$         |       |      |    | <b>DES97.11</b> - PDA:1,4-ButOH (1:1)<br>$x_1=0.499, x_2=0.501, x_3=0.000$           |       |      |    |
| 293.15                                                                                | 46.02 | 0.01 |    | 293.15                                                                               | 46.13 | 0.01 |    |
| 298.15                                                                                | 45.62 | 0.01 |    | 298.15                                                                               | 45.96 | 0.01 |    |
| 303.15                                                                                | 44.83 | 0.01 | 42 | 303.15                                                                               | 45.04 | 0.01 | 42 |
| 308.15                                                                                | 44.46 | 0.01 |    | 308.15                                                                               | 44.74 | 0.01 |    |
| 313.15                                                                                | 44.07 | 0.01 |    | 313.15                                                                               | 44.37 | 0.01 |    |
| 318.15                                                                                | 43.78 | 0.01 |    | 318.15                                                                               | 44.21 | 0.01 |    |
| <b>DES97.12</b> - PDA:1,4-ButOH (1:1.23)<br>$x_1=0.448, x_2=0.552, x_3=0.000$         |       |      |    | <b>DES97.13</b> - PDA:1,4-ButOH (1:1.53)<br>$x_1=0.396, x_2=0.604, x_3=0.000$        |       |      |    |
| 293.15                                                                                | 46.47 | 0.01 |    | 293.15                                                                               | 46.75 | 0.01 |    |
| 298.15                                                                                | 46.09 | 0.01 |    | 298.15                                                                               | 46.21 | 0.01 |    |
| 303.15                                                                                | 45.23 | 0.01 | 42 | 303.15                                                                               | 45.37 | 0.01 | 42 |
| 308.15                                                                                | 45.23 | 0.01 |    | 308.15                                                                               | 45.39 | 0.01 |    |
| 313.15                                                                                | 44.63 | 0.01 |    | 313.15                                                                               | 44.81 | 0.01 |    |
| 318.15                                                                                | 44.42 | 0.01 |    | 318.15                                                                               | 44.58 | 0.01 |    |
| <b>DES97.14</b> - PDA:1,4-ButOH (1:1.92)<br>$x_1=0.343, x_2=0.657, x_3=0.000$         |       |      |    | <b>DES97.15</b> - PDA:1,4-ButOH (1:2.47)<br>$x_1=0.288, x_2=0.712, x_3=0.000$        |       |      |    |
| 293.15                                                                                | 46.79 | 0.01 |    | 293.15                                                                               | 46.69 | 0.01 |    |
| 298.15                                                                                | 46.26 | 0.01 |    | 298.15                                                                               | 46.14 | 0.01 |    |
| 303.15                                                                                | 45.50 | 0.01 | 42 | 303.15                                                                               | 45.45 | 0.01 | 42 |
| 308.15                                                                                | 45.42 | 0.01 |    | 308.15                                                                               | 45.32 | 0.01 |    |
| 313.15                                                                                | 44.87 | 0.01 |    | 313.15                                                                               | 44.86 | 0.01 |    |
| 318.15                                                                                | 44.73 | 0.01 |    | 318.15                                                                               | 44.63 | 0.01 |    |
| <b>DES97.16</b> - PDA:1,4-ButOH (1:3.29)<br>$x_1=0.233, x_2=0.767, x_3=0.000$         |       |      |    | <b>DES97.17</b> - PDA:1,4-ButOH (1:4.65)<br>$x_1=0.177, x_2=0.823, x_3=0.000$        |       |      |    |
| 293.15                                                                                | 46.48 | 0.01 |    | 293.15                                                                               | 46.15 | 0.01 |    |
| 298.15                                                                                | 45.73 | 0.01 |    | 298.15                                                                               | 45.51 | 0.01 |    |
| 303.15                                                                                | 45.17 | 0.01 | 42 | 303.15                                                                               | 45.12 | 0.01 | 42 |
| 308.15                                                                                | 45.10 | 0.01 |    | 308.15                                                                               | 44.90 | 0.01 |    |
| 313.15                                                                                | 44.71 | 0.01 |    | 313.15                                                                               | 44.56 | 0.01 |    |
| 318.15                                                                                | 44.52 | 0.01 |    | 318.15                                                                               | 44.40 | 0.01 |    |
| <b>DES97.18</b> - PDA:1,4-ButOH (1:7.40)<br>$x_1=0.119, x_2=0.881, x_3=0.000$         |       |      |    | <b>DES97.19</b> - PDA:1,4-ButOH (1:15.67)<br>$x_1=0.060, x_2=0.940, x_3=0.000$       |       |      |    |
| 293.15                                                                                | 45.86 | 0.01 |    | 293.15                                                                               | 45.56 | 0.01 |    |
| 298.15                                                                                | 45.35 | 0.01 |    | 298.15                                                                               | 44.97 | 0.01 |    |
| 303.15                                                                                | 44.77 | 0.01 | 42 | 303.15                                                                               | 44.45 | 0.01 | 42 |
| 308.15                                                                                | 44.71 | 0.01 |    | 308.15                                                                               | 44.30 | 0.01 |    |
| 313.15                                                                                | 44.39 | 0.01 |    | 313.15                                                                               | 44.10 | 0.01 |    |
| 318.15                                                                                | 44.27 | 0.01 |    | 318.15                                                                               | 43.85 | 0.01 |    |
| <b>DES98.1</b> - PEG200:LacA:Act (1:0.25:0.14)<br>$x_1=0.720, x_2=0.180, x_3=0.100$   |       |      |    | <b>DES98.2</b> - PEG200:LacA:Act (1:0.25:0.31)<br>$x_1=0.640, x_2=0.160, x_3=0.200$  |       |      |    |
| 298.00                                                                                | 43.41 | 0.10 | 29 | 298.00                                                                               | 43.03 | 0.10 | 29 |
| <b>DES98.3</b> - PEG200:LacA:Act (1:0.25:0.54)<br>$x_1=0.560, x_2=0.140, x_3=0.300$   |       |      |    | <b>DES98.4</b> - PEG200:LacA:Act (1:0.25:0.83)<br>$x_1=0.480, x_2=0.120, x_3=0.400$  |       |      |    |
| 298.00                                                                                | 43.41 | 0.10 | 29 | 298.00                                                                               | 42.90 | 0.10 | 29 |
| <b>DES98.5</b> - PEG200:LacA:Act (1:0.25:0.1.25)<br>$x_1=0.400, x_2=0.100, x_3=0.500$ |       |      |    | <b>DES98.6</b> - PEG200:LacA:Act (1:0.25:1.88)<br>$x_1=0.320, x_2=0.080, x_3=0.600$  |       |      |    |
| 298.00                                                                                | 42.36 | 0.10 | 29 | 298.00                                                                               | 40.26 | 0.10 | 29 |
| <b>DES98.7</b> - PEG200:LacA:Act (1:0.25:2.92)<br>$x_1=0.240, x_2=0.060, x_3=0.700$   |       |      |    | <b>DES98.8</b> - PEG200:LacA:Act (1:0.25:5)<br>$x_1=0.160, x_2=0.040, x_3=0.800$     |       |      |    |
| 298.00                                                                                | 33.19 | 0.10 | 29 | 298.00                                                                               | 29.50 | 0.10 | 29 |
| <b>DES98.9</b> - PEG200:LacA:Act (1:0.25:11.25)<br>$x_1=0.080, x_2=0.020, x_3=0.900$  |       |      |    | <b>DES99.1</b> - PEG200:LacA:EtAc (1:0.25:0.14)<br>$x_1=0.720, x_2=0.180, x_3=0.100$ |       |      |    |
| 298.00                                                                                | 23.73 | 0.10 | 29 | 298.00                                                                               | 39.88 | 0.10 | 29 |
| <b>DES99.2</b> - PEG200:LacA:EtAc (1:0.25:0.31)<br>$x_1=0.640, x_2=0.160, x_3=0.200$  |       |      |    | <b>DES99.3</b> - PEG200:LacA:EtAc (1:0.25:0.54)<br>$x_1=0.560, x_2=0.140, x_3=0.300$ |       |      |    |
| 298.00                                                                                | 35.54 | 0.10 | 29 | 298.00                                                                               | 33.84 | 0.10 | 29 |

|                                                                                                   |                                                                                                                     |
|---------------------------------------------------------------------------------------------------|---------------------------------------------------------------------------------------------------------------------|
| <b>DES99.4</b> - PEG200:LacA:EtAc (1:0.25:0.83)<br>$x_1=0.480, x_2=0.120, x_3=0.400$              | <b>DES99.5</b> - PEG200:LacA:EtAc (1:0.25:0.1.25)<br>$x_1=0.400, x_2=0.100, x_3=0.500$                              |
| 298.00 30.55 0.10 <sup>29</sup>                                                                   | 298.00 28.21 0.10 <sup>29</sup>                                                                                     |
| <b>DES99.6</b> - PEG200:LacA:EtAc (1:0.25:1.88)<br>$x_1=0.320, x_2=0.080, x_3=0.600$              | <b>DES99.7</b> - PEG200:LacA:EtAc (1:0.25:2.92)<br>$x_1=0.240, x_2=0.060, x_3=0.700$                                |
| 298.00 25.05 0.10 <sup>29</sup>                                                                   | 298.00 22.95 0.10 <sup>29</sup>                                                                                     |
| <b>DES99.8</b> - PEG200:LacA:EtAc (1:0.25:5)<br>$x_1=0.160, x_2=0.040, x_3=0.800$                 | <b>DES99.9</b> - PEG200:LacA:EtAc (1:0.25:11.25)<br>$x_1=0.080, x_2=0.020, x_3=0.900$                               |
| 298.00 21.39 0.10 <sup>29</sup>                                                                   | 298.00 19.93 0.10 <sup>29</sup>                                                                                     |
| <b>DES100.1</b> - PEG200:LacA:Eth (1:0.25:0.14)<br>$x_1=0.720, x_2=0.180, x_3=0.100$              | <b>DES100.2</b> - PEG200:LacA:Eth (1:0.25:0.31)<br>$x_1=0.640, x_2=0.160, x_3=0.200$                                |
| 298.00 42.11 0.10 <sup>29</sup>                                                                   | 298.00 40.01 0.10 <sup>29</sup>                                                                                     |
| <b>DES100.3</b> - PEG200:LacA:Eth (1:0.25:0.54)<br>$x_1=0.560, x_2=0.140, x_3=0.300$              | <b>DES100.4</b> - PEG200:LacA:Eth (1:0.25:0.83)<br>$x_1=0.480, x_2=0.120, x_3=0.400$                                |
| 298.00 37.37 0.10 <sup>29</sup>                                                                   | 298.00 36.08 0.10 <sup>29</sup>                                                                                     |
| <b>DES100.5</b> - PEG200:LacA:Eth (1:0.25:0.1.25)<br>$x_1=0.400, x_2=0.100, x_3=0.500$            | <b>DES100.6</b> - PEG200:LacA:Eth (1:0.25:1.88)<br>$x_1=0.320, x_2=0.080, x_3=0.600$                                |
| 298.00 33.44 0.10 <sup>29</sup>                                                                   | 298.00 30.44 0.10 <sup>29</sup>                                                                                     |
| <b>DES100.7</b> - PEG200:LacA:Eth (1:0.25:2.92)<br>$x_1=0.240, x_2=0.060, x_3=0.700$              | <b>DES100.8</b> - PEG200:LacA:Eth (1:0.25:5)<br>$x_1=0.160, x_2=0.040, x_3=0.800$                                   |
| 298.00 26.62 0.10 <sup>29</sup>                                                                   | 298.00 23.87 0.10 <sup>29</sup>                                                                                     |
| <b>DES100.9</b> - PEG200:LacA:Eth (1:0.25:11.25)<br>$x_1=0.080, x_2=0.020, x_3=0.900$             | <b>DES101.1</b> - PEG200:LacA:H <sub>2</sub> O (1:0.25:0.14)<br>$x_1=0.720, x_2=0.180, x_3=0.100$                   |
| 298.00 20.98 0.10 <sup>29</sup>                                                                   | 298.00 44.46 0.10 <sup>29</sup>                                                                                     |
| <b>DES101.2</b> - PEG200:LacA:H <sub>2</sub> O (1:0.25:0.31)<br>$x_1=0.640, x_2=0.160, x_3=0.200$ | <b>DES101.3</b> - PEG200:LacA:H <sub>2</sub> O (1:0.25:0.54)<br>$x_1=0.560, x_2=0.140, x_3=0.300$                   |
| 298.00 45.51 0.10 <sup>29</sup>                                                                   | 298.00 45.65 0.10 <sup>29</sup>                                                                                     |
| <b>DES101.4</b> - PEG200:LacA:H <sub>2</sub> O (1:0.25:0.83)<br>$x_1=0.480, x_2=0.120, x_3=0.400$ | <b>DES101.5</b> - PEG200:LacA:H <sub>2</sub> O (1:0.25:0.1.25)<br>$x_1=0.400, x_2=0.100, x_3=0.500$                 |
| 298.00 45.91 0.10 <sup>29</sup>                                                                   | 298.00 46.56 0.10 <sup>29</sup>                                                                                     |
| <b>DES101.6</b> - PEG200:LacA:H <sub>2</sub> O (1:0.25:1.88)<br>$x_1=0.320, x_2=0.080, x_3=0.600$ | <b>DES101.7</b> - PEG200:LacA:H <sub>2</sub> O (1:0.25:2.92)<br>$x_1=0.240, x_2=0.060, x_3=0.700$                   |
| 298.00 46.96 0.10 <sup>29</sup>                                                                   | 298.00 48.13 0.10 <sup>29</sup>                                                                                     |
| <b>DES101.8</b> - PEG200:LacA:H <sub>2</sub> O (1:0.25:5)<br>$x_1=0.160, x_2=0.040, x_3=0.800$    | <b>DES101.9</b> - PEG200:LacA:H <sub>2</sub> O (1:0.25:11.25)<br>$x_1=0.080, x_2=0.020, x_3=0.900$                  |
| 298.00 48.40 0.10 <sup>29</sup>                                                                   | 298.00 48.26 0.10 <sup>29</sup>                                                                                     |
| <b>DES102.1</b> - PEG200:LacA:IsoOH (1:0.25:0.14)<br>$x_1=0.720, x_2=0.180, x_3=0.100$            | <b>DES102.2</b> - PEG200:LacA:IsoOH (1:0.25:0.31)<br>$x_1=0.640, x_2=0.160, x_3=0.200$                              |
| 298.00 39.61 0.10 <sup>29</sup>                                                                   | 298.00 36.72 0.10 <sup>29</sup>                                                                                     |
| <b>DES102.3</b> - PEG200:LacA:IsoOH (1:0.25:0.54)<br>$x_1=0.560, x_2=0.140, x_3=0.300$            | <b>DES102.4</b> - PEG200:LacA:IsoOH (1:0.25:0.83)<br>$x_1=0.480, x_2=0.120, x_3=0.400$                              |
| 298.00 33.71 0.10 <sup>29</sup>                                                                   | 298.00 30.17 0.10 <sup>29</sup>                                                                                     |
| <b>DES102.5</b> - PEG200:LacA:IsoOH (1:0.25:0.1.25)<br>$x_1=0.400, x_2=0.100, x_3=0.500$          | <b>DES102.6</b> - PEG200:LacA:IsoOH (1:0.25:1.88)<br>$x_1=0.320, x_2=0.080, x_3=0.600$                              |
| 298.00 27.29 0.10 <sup>29</sup>                                                                   | 298.00 25.05 0.10 <sup>29</sup>                                                                                     |
| <b>DES102.7</b> - PEG200:LacA:IsoOH (1:0.25:2.92)<br>$x_1=0.240, x_2=0.060, x_3=0.700$            | <b>DES102.8</b> - PEG200:LacA:IsoOH (1:0.25:5)<br>$x_1=0.160, x_2=0.040, x_3=0.800$                                 |
| 298.00 21.65 0.10 <sup>29</sup>                                                                   | 298.00 20.20 0.10 <sup>29</sup>                                                                                     |
| <b>DES102.9</b> - PEG200:LacA:IsoOH (1:0.25:11.25)<br>$x_1=0.080, x_2=0.020, x_3=0.900$           | <b>DES103</b> - PEG200:LacA (4:1)<br>$x_1=0.800, x_2=0.200, x_3=0.000$                                              |
| 298.00 18.23 0.10 <sup>29</sup>                                                                   | 298.00 45.17 0.10<br>308.00 44.33 0.10<br>318.00 44.00 0.10 <sup>29</sup><br>328.00 42.84 0.10<br>338.00 42.30 0.10 |
| <b>DES104.1</b> - PEG200:NMA:Act (1:0.25:0.14)<br>$x_1=0.720, x_2=0.180, x_3=0.100$               | <b>DES104.2</b> - PEG200:NMA:Act (1:0.25:0.31)<br>$x_1=0.640, x_2=0.160, x_3=0.200$                                 |
| 298.00 40.95 0.10 <sup>29</sup>                                                                   | 298.00 40.33 0.10 <sup>29</sup>                                                                                     |
| <b>DES104.3</b> - PEG200:NMA:Act (1:0.25:0.54)<br>$x_1=0.560, x_2=0.140, x_3=0.300$               | <b>DES104.4</b> - PEG200:NMA:Act (1:0.25:0.83)<br>$x_1=0.480, x_2=0.120, x_3=0.400$                                 |
| 298.00 38.48 0.10 <sup>29</sup>                                                                   | 298.00 37.49 0.10 <sup>29</sup>                                                                                     |
| <b>DES104.5</b> - PEG200:NMA:Act (1:0.25:0.1.25)<br>$x_1=0.400, x_2=0.100, x_3=0.500$             | <b>DES104.6</b> - PEG200:NMA:Act (1:0.25:1.88)<br>$x_1=0.320, x_2=0.080, x_3=0.600$                                 |
| 298.00 36.38 0.10 <sup>29</sup>                                                                   | 298.00 33.76 0.10 <sup>29</sup>                                                                                     |
| <b>DES104.7</b> - PEG200:NMA:Act (1:0.25:2.92)<br>$x_1=0.240, x_2=0.060, x_3=0.700$               | <b>DES104.8</b> - PEG200:NMA:Act (1:0.25:5)<br>$x_1=0.160, x_2=0.040, x_3=0.800$                                    |
| 298.00 29.31 0.10 <sup>29</sup>                                                                   | 298.00 24.49 0.10 <sup>29</sup>                                                                                     |
| <b>DES104.9</b> - PEG200:NMA:Act (1:0.25:11.25)<br>$x_1=0.080, x_2=0.020, x_3=0.900$              | <b>DES104.10</b> - PEG200:NMA:Act (1:2:0.33)<br>$x_1=0.300, x_2=0.600, x_3=0.100$                                   |
| 298.00 20.53 0.10 <sup>29</sup>                                                                   | 298.00 38.13 0.10 <sup>29</sup>                                                                                     |

|                                                                                                  |                                                                                                  |
|--------------------------------------------------------------------------------------------------|--------------------------------------------------------------------------------------------------|
| <b>DES104.11</b> - PEG200:NMA:Act (1:2:0.75)<br>$x_1=0.266, x_2=0.534, x_3=0.200$                | <b>DES104.12</b> - PEG200:NMA:Act (1:2:1.29)<br>$x_1=0.233, x_2=0.467, x_3=0.300$                |
| 298.00 37.58 0.10 <sup>29</sup>                                                                  | 298.00 36.83 0.10 <sup>29</sup>                                                                  |
| <b>DES104.13</b> - PEG200:NMA:Act (1:2:2)<br>$x_1=0.200, x_2=0.400, x_3=0.400$                   | <b>DES104.14</b> - PEG200:NMA:Act (1:2:3)<br>$x_1=0.167, x_2=0.334, x_3=0.500$                   |
| 298.00 35.97 0.10 <sup>29</sup>                                                                  | 298.00 34.78 0.10 <sup>29</sup>                                                                  |
| <b>DES104.15</b> - PEG200:NMA:Act (1:2:4.5)<br>$x_1=0.133, x_2=0.267, x_3=0.600$                 | <b>DES104.16</b> - PEG200:NMA:Act (1:2:7)<br>$x_1=0.100, x_2=0.200, x_3=0.700$                   |
| 298.00 33.04 0.10 <sup>29</sup>                                                                  | 298.00 30.03 0.10 <sup>29</sup>                                                                  |
| <b>DES104.17</b> - PEG200:NMA:Act (1:2:12)<br>$x_1=0.067, x_2=0.133, x_3=0.800$                  | <b>DES104.18</b> - PEG200:NMA:Act (1:2:27)<br>$x_1=0.033, x_2=0.067, x_3=0.900$                  |
| 298.00 25.82 0.10 <sup>29</sup>                                                                  | 298.00 23.34 0.10 <sup>29</sup>                                                                  |
| <b>DES105.1</b> - PEG200:NMA:EtAc (1:0.25:0.14)<br>$x_1=0.720, x_2=0.180, x_3=0.100$             | <b>DES105.2</b> - PEG200:NMA:EtAc (1:0.25:0.31)<br>$x_1=0.640, x_2=0.160, x_3=0.200$             |
| 298.00 39.34 0.10 <sup>29</sup>                                                                  | 298.00 36.62 0.10 <sup>29</sup>                                                                  |
| <b>DES105.3</b> - PEG200:NMA:EtAc (1:0.25:0.54)<br>$x_1=0.560, x_2=0.140, x_3=0.300$             | <b>DES105.4</b> - PEG200:NMA:EtAc (1:0.25:0.83)<br>$x_1=0.480, x_2=0.120, x_3=0.400$             |
| 298.00 34.15 0.10 <sup>29</sup>                                                                  | 298.00 31.91 0.10 <sup>29</sup>                                                                  |
| <b>DES105.5</b> - PEG200:NMA:EtAc (1:0.25:0.1.25)<br>$x_1=0.400, x_2=0.100, x_3=0.500$           | <b>DES105.6</b> - PEG200:NMA:EtAc (1:0.25:1.88)<br>$x_1=0.320, x_2=0.080, x_3=0.600$             |
| 298.00 29.06 0.10 <sup>29</sup>                                                                  | 298.00 26.22 0.10 <sup>29</sup>                                                                  |
| <b>DES105.7</b> - PEG200:NMA:EtAc (1:0.25:2.92)<br>$x_1=0.240, x_2=0.060, x_3=0.700$             | <b>DES105.8</b> - PEG200:NMA:EtAc (1:0.25:5)<br>$x_1=0.160, x_2=0.040, x_3=0.800$                |
| 298.00 23.50 0.10 <sup>29</sup>                                                                  | 298.00 21.27 0.10 <sup>29</sup>                                                                  |
| <b>DES105.9</b> - PEG200:NMA:EtAc (1:0.25:11.25)<br>$x_1=0.080, x_2=0.020, x_3=0.900$            | <b>DES105.10</b> - PEG200:NMA:EtAc (1:2:0.33)<br>$x_1=0.300, x_2=0.600, x_3=0.100$               |
| 298.00 19.66 0.10 <sup>29</sup>                                                                  | 298.00 37.04 0.10 <sup>29</sup>                                                                  |
| <b>DES105.11</b> - PEG200:NMA:EtAc (1:2:0.75)<br>$x_1=0.266, x_2=0.534, x_3=0.200$               | <b>DES105.12</b> - PEG200:NMA:EtAc (1:2:1.29)<br>$x_1=0.233, x_2=0.467, x_3=0.300$               |
| 298.00 34.78 0.10 <sup>29</sup>                                                                  | 298.00 32.08 0.10 <sup>29</sup>                                                                  |
| <b>DES105.13</b> - PEG200:NMA:EtAc (1:2:2)<br>$x_1=0.200, x_2=0.400, x_3=0.400$                  | <b>DES105.14</b> - PEG200:NMA:EtAc (1:2:3)<br>$x_1=0.167, x_2=0.334, x_3=0.500$                  |
| 298.00 29.60 0.10 <sup>29</sup>                                                                  | 298.00 27.01 0.10 <sup>29</sup>                                                                  |
| <b>DES105.15</b> - PEG200:NMA:EtAc (1:2:4.5)<br>$x_1=0.133, x_2=0.267, x_3=0.600$                | <b>DES105.16</b> - PEG200:NMA:EtAc (1:2:7)<br>$x_1=0.100, x_2=0.200, x_3=0.700$                  |
| 298.00 24.74 0.10 <sup>29</sup>                                                                  | 298.00 23.12 0.10 <sup>29</sup>                                                                  |
| <b>DES105.17</b> - PEG200:NMA:EtAc (1:2:12)<br>$x_1=0.067, x_2=0.133, x_3=0.800$                 | <b>DES105.18</b> - PEG200:NMA:EtAc (1:2:27)<br>$x_1=0.033, x_2=0.067, x_3=0.900$                 |
| 298.00 21.50 0.10 <sup>29</sup>                                                                  | 298.00 20.74 0.10 <sup>29</sup>                                                                  |
| <b>DES106.1</b> - PEG200:NMA:Eth (1:0.25:0.14)<br>$x_1=0.720, x_2=0.180, x_3=0.100$              | <b>DES106.2</b> - PEG200:NMA:Eth (1:0.25:0.31)<br>$x_1=0.640, x_2=0.160, x_3=0.200$              |
| 298.00 40.09 0.10 <sup>29</sup>                                                                  | 298.00 37.61 0.10 <sup>29</sup>                                                                  |
| <b>DES106.3</b> - PEG200:NMA:Eth (1:0.25:0.54)<br>$x_1=0.560, x_2=0.140, x_3=0.300$              | <b>DES106.4</b> - PEG200:NMA:Eth (1:0.25:0.83)<br>$x_1=0.480, x_2=0.120, x_3=0.400$              |
| 298.00 35.76 0.10 <sup>29</sup>                                                                  | 298.00 33.90 0.10 <sup>29</sup>                                                                  |
| <b>DES106.5</b> - PEG200:NMA:Eth (1:0.25:0.83)<br>$x_1=0.400, x_2=0.100, x_3=0.500$              | <b>DES106.6</b> - PEG200:NMA:Eth (1:0.25:1.88)<br>$x_1=0.320, x_2=0.080, x_3=0.600$              |
| 298.00 31.54 0.10 <sup>29</sup>                                                                  | 298.00 29.06 0.10 <sup>29</sup>                                                                  |
| <b>DES106.7</b> - PEG200:NMA:Eth (1:0.25:2.92)<br>$x_1=0.240, x_2=0.060, x_3=0.700$              | <b>DES106.8</b> - PEG200:NMA:Eth (1:0.25:5)<br>$x_1=0.160, x_2=0.040, x_3=0.800$                 |
| 298.00 26.59 0.10 <sup>29</sup>                                                                  | 298.00 22.88 0.10 <sup>29</sup>                                                                  |
| <b>DES106.9</b> - PEG200:NMA:Eth (1:0.25:11.25)<br>$x_1=0.080, x_2=0.020, x_3=0.900$             | <b>DES106.10</b> - PEG200:NMA:Eth (1:2:0.33)<br>$x_1=0.300, x_2=0.600, x_3=0.100$                |
| 298.00 19.66 0.10 <sup>29</sup>                                                                  | 298.00 36.83 0.10 <sup>29</sup>                                                                  |
| <b>DES106.11</b> - PEG200:NMA:Eth (1:2:0.75)<br>$x_1=0.266, x_2=0.534, x_3=0.200$                | <b>DES106.12</b> - PEG200:NMA:Eth (1:2:1.29)<br>$x_1=0.233, x_2=0.467, x_3=0.300$                |
| 298.00 34.66 0.10 <sup>29</sup>                                                                  | 298.00 32.73 0.10 <sup>29</sup>                                                                  |
| <b>DES106.13</b> - PEG200:NMA:Eth (1:2:2)<br>$x_1=0.200, x_2=0.400, x_3=0.400$                   | <b>DES106.14</b> - PEG200:NMA:Eth (1:2:3)<br>$x_1=0.167, x_2=0.334, x_3=0.500$                   |
| 298.00 30.79 0.10 <sup>29</sup>                                                                  | 298.00 28.63 0.10 <sup>29</sup>                                                                  |
| <b>DES106.15</b> - PEG200:NMA:Eth (1:2:4.5)<br>$x_1=0.133, x_2=0.267, x_3=0.600$                 | <b>DES106.16</b> - PEG200:NMA:Eth (1:2:7)<br>$x_1=0.100, x_2=0.200, x_3=0.700$                   |
| 298.00 26.89 0.10 <sup>29</sup>                                                                  | 298.00 24.63 0.10 <sup>29</sup>                                                                  |
| <b>DES106.17</b> - PEG200:NMA:Eth (1:2:12)<br>$x_1=0.067, x_2=0.133, x_3=0.800$                  | <b>DES106.18</b> - PEG200:NMA:Eth (1:2:27)<br>$x_1=0.033, x_2=0.067, x_3=0.900$                  |
| 298.00 22.05 0.10 <sup>29</sup>                                                                  | 298.00 19.67 0.10 <sup>29</sup>                                                                  |
| <b>DES107.1</b> - PEG200:NMA:H <sub>2</sub> O (1:0.25:0.14)<br>$x_1=0.720, x_2=0.180, x_3=0.100$ | <b>DES107.2</b> - PEG200:NMA:H <sub>2</sub> O (1:0.25:0.31)<br>$x_1=0.640, x_2=0.160, x_3=0.200$ |
| 298.00 42.56 0.10 <sup>29</sup>                                                                  | 298.00 42.93 0.10 <sup>29</sup>                                                                  |
| <b>DES107.3</b> - PEG200:NMA:H <sub>2</sub> O (1:0.25:0.54)                                      | <b>DES107.4</b> - PEG200:NMA:H <sub>2</sub> O (1:0.25:0.83)                                      |

|                                                                                                   |                                                                                                  |
|---------------------------------------------------------------------------------------------------|--------------------------------------------------------------------------------------------------|
| $x_1=0.560, x_2=0.140, x_3=0.300$                                                                 | $x_1=0.480, x_2=0.120, x_3=0.400$                                                                |
| 298.00 43.43 0.10 <sup>29</sup>                                                                   | 298.00 43.55 0.10 <sup>29</sup>                                                                  |
| <b>DES107.5</b> - PEG200:NMA:H <sub>2</sub> O (1:0.25:0.125)<br>$x_1=0.400, x_2=0.100, x_3=0.500$ | <b>DES107.6</b> - PEG200:NMA:H <sub>2</sub> O (1:0.25:1.88)<br>$x_1=0.320, x_2=0.080, x_3=0.600$ |
| 298.00 43.92 0.10 <sup>29</sup>                                                                   | 298.00 44.54 0.10 <sup>29</sup>                                                                  |
| <b>DES107.7</b> - PEG200:NMA:H <sub>2</sub> O (1:0.25:2.92)<br>$x_1=0.240, x_2=0.060, x_3=0.700$  | <b>DES107.8</b> - PEG200:NMA:H <sub>2</sub> O (1:0.25:5)<br>$x_1=0.160, x_2=0.040, x_3=0.800$    |
| 298.00 45.03 0.10 <sup>29</sup>                                                                   | 298.00 46.27 0.10 <sup>29</sup>                                                                  |
| <b>DES107.9</b> - PEG200:NMA:H <sub>2</sub> O (1:0.25:11.25)<br>$x_1=0.080, x_2=0.020, x_3=0.900$ | <b>DES107.10</b> - PEG200:NMA:H <sub>2</sub> O (1:2:0.33)<br>$x_1=0.300, x_2=0.600, x_3=0.100$   |
| 298.00 45.16 0.10 <sup>29</sup>                                                                   | 298.00 39.85 0.10 <sup>29</sup>                                                                  |
| <b>DES107.11</b> - PEG200:NMA:H <sub>2</sub> O (1:2:0.75)<br>$x_1=0.266, x_2=0.534, x_3=0.200$    | <b>DES107.12</b> - PEG200:NMA:H <sub>2</sub> O (1:2:1.29)<br>$x_1=0.233, x_2=0.467, x_3=0.300$   |
| 298.00 40.82 0.10 <sup>29</sup>                                                                   | 298.00 41.47 0.10 <sup>29</sup>                                                                  |
| <b>DES107.13</b> - PEG200:NMA:H <sub>2</sub> O (1:2:2)<br>$x_1=0.200, x_2=0.400, x_3=0.400$       | <b>DES107.14</b> - PEG200:NMA:H <sub>2</sub> O (1:2:3)<br>$x_1=0.167, x_2=0.334, x_3=0.500$      |
| 298.00 42.56 0.10 <sup>29</sup>                                                                   | 298.00 43.42 0.10 <sup>29</sup>                                                                  |
| <b>DES107.15</b> - PEG200:NMA:H <sub>2</sub> O (1:2:4.5)<br>$x_1=0.133, x_2=0.267, x_3=0.600$     | <b>DES107.16</b> - PEG200:NMA:H <sub>2</sub> O (1:2:7)<br>$x_1=0.100, x_2=0.200, x_3=0.700$      |
| 298.00 44.05 0.10 <sup>29</sup>                                                                   | 298.00 45.24 0.10 <sup>29</sup>                                                                  |
| <b>DES107.17</b> - PEG200:NMA:H <sub>2</sub> O (1:2:12)<br>$x_1=0.067, x_2=0.133, x_3=0.800$      | <b>DES107.18</b> - PEG200:NMA:H <sub>2</sub> O (1:2:27)<br>$x_1=0.033, x_2=0.067, x_3=0.900$     |
| 298.00 47.19 0.10 <sup>29</sup>                                                                   | 298.00 47.40 0.10 <sup>29</sup>                                                                  |
| <b>DES108.1</b> - PEG200:NMA:IsoOH (1:0.25:0.14)<br>$x_1=0.720, x_2=0.180, x_3=0.100$             | <b>DES108.2</b> - PEG200:NMA:IsoOH (1:0.25:0.31)<br>$x_1=0.640, x_2=0.160, x_3=0.200$            |
| 298.00 38.60 0.10 <sup>29</sup>                                                                   | 298.00 34.89 0.10 <sup>29</sup>                                                                  |
| <b>DES108.3</b> - PEG200:NMA:IsoOH (1:0.25:0.54)<br>$x_1=0.560, x_2=0.140, x_3=0.300$             | <b>DES108.4</b> - PEG200:NMA:IsoOH (1:0.25:0.83)<br>$x_1=0.480, x_2=0.120, x_3=0.400$            |
| 298.00 32.53 0.10 <sup>29</sup>                                                                   | 298.00 29.81 0.10 <sup>29</sup>                                                                  |
| <b>DES108.5</b> - PEG200:NMA:IsoOH (1:0.25:0.125)<br>$x_1=0.400, x_2=0.100, x_3=0.500$            | <b>DES108.6</b> - PEG200:NMA:IsoOH (1:0.25:1.88)<br>$x_1=0.320, x_2=0.080, x_3=0.600$            |
| 298.00 26.96 0.10 <sup>29</sup>                                                                   | 298.00 24.73 0.10 <sup>29</sup>                                                                  |
| <b>DES108.7</b> - PEG200:NMA:IsoOH (1:0.25:2.92)<br>$x_1=0.240, x_2=0.060, x_3=0.700$             | <b>DES108.8</b> - PEG200:NMA:IsoOH (1:0.25:5)<br>$x_1=0.160, x_2=0.040, x_3=0.800$               |
| 298.00 22.14 0.10 <sup>29</sup>                                                                   | 298.00 19.91 0.10 <sup>29</sup>                                                                  |
| <b>DES108.9</b> - PEG200:NMA:IsoOH (1:0.25:11.25)<br>$x_1=0.080, x_2=0.020, x_3=0.900$            | <b>DES108.10</b> - PEG200:NMA:IsoOH (1:2:0.33)<br>$x_1=0.300, x_2=0.600, x_3=0.100$              |
| 298.00 17.69 0.10 <sup>29</sup>                                                                   | 298.00 35.32 0.10 <sup>29</sup>                                                                  |
| <b>DES108.11</b> - PEG200:NMA:IsoOH (1:2:0.75)<br>$x_1=0.266, x_2=0.534, x_3=0.200$               | <b>DES108.12</b> - PEG200:NMA:IsoOH (1:2:1.29)<br>$x_1=0.233, x_2=0.467, x_3=0.300$              |
| 298.00 32.41 0.10 <sup>29</sup>                                                                   | 298.00 29.60 0.10 <sup>29</sup>                                                                  |
| <b>DES108.13</b> - PEG200:NMA:IsoOH (1:2:2)<br>$x_1=0.200, x_2=0.400, x_3=0.400$                  | <b>DES108.14</b> - PEG200:NMA:IsoOH (1:2:3)<br>$x_1=0.167, x_2=0.334, x_3=0.500$                 |
| 298.00 26.79 0.10 <sup>29</sup>                                                                   | 298.00 24.41 0.10 <sup>29</sup>                                                                  |
| <b>DES108.15</b> - PEG200:NMA:IsoOH (1:2:4.5)<br>$x_1=0.133, x_2=0.267, x_3=0.600$                | <b>DES108.16</b> - PEG200:NMA:IsoOH (1:2:7)<br>$x_1=0.100, x_2=0.200, x_3=0.700$                 |
| 298.00 22.58 0.10 <sup>29</sup>                                                                   | 298.00 21.07 0.10 <sup>29</sup>                                                                  |
| <b>DES108.17</b> - PEG200:NMA:IsoOH (1:2:12)<br>$x_1=0.067, x_2=0.133, x_3=0.800$                 | <b>DES108.18</b> - PEG200:NMA:IsoOH (1:2:27)<br>$x_1=0.033, x_2=0.067, x_3=0.900$                |
| 298.00 19.24 0.10 <sup>29</sup>                                                                   | 298.00 17.62 0.10 <sup>29</sup>                                                                  |
| <b>DES109.1</b> - PEG200:NMA (1:2)<br>$x_1=0.333, x_2=0.667, x_3=0.000$                           | <b>DES109.2</b> - PEG200:NMA (4:1)<br>$x_1=0.800, x_2=0.200, x_3=0.000$                          |
| 298.00 40.64 0.10                                                                                 | 298.00 44.17 0.10                                                                                |
| 308.00 39.90 0.10                                                                                 | 308.00 43.40 0.10                                                                                |
| 318.00 39.28 0.10 <sup>29</sup>                                                                   | 318.00 42.73 0.10 <sup>29</sup>                                                                  |
| 328.00 38.65 0.10                                                                                 | 328.00 42.14 0.10                                                                                |
| 338.00 38.02 0.10                                                                                 | 338.00 41.48 0.10                                                                                |
| <b>DES110.1</b> - PEG200:ThU:Act (1:0.25:0.14)<br>$x_1=0.720, x_2=0.180, x_3=0.100$               | <b>DES110.2</b> - PEG200:ThU:Act (1:0.25:0.31)<br>$x_1=0.640, x_2=0.160, x_3=0.200$              |
| 298.00 44.16 0.10 <sup>29</sup>                                                                   | 298.00 42.78 0.10 <sup>29</sup>                                                                  |
| <b>DES110.3</b> - PEG200:ThU:Act (1:0.25:0.54)<br>$x_1=0.560, x_2=0.140, x_3=0.300$               | <b>DES110.4</b> - PEG200:ThU:Act (1:0.25:0.83)<br>$x_1=0.480, x_2=0.120, x_3=0.400$              |
| 298.00 40.77 0.10 <sup>29</sup>                                                                   | 298.00 38.88 0.10 <sup>29</sup>                                                                  |
| <b>DES110.5</b> - PEG200:ThU:Act (1:0.25:0.125)<br>$x_1=0.400, x_2=0.100, x_3=0.500$              | <b>DES110.6</b> - PEG200:ThU:Act (1:0.25:1.88)<br>$x_1=0.320, x_2=0.080, x_3=0.600$              |
| 298.00 36.48 0.10 <sup>29</sup>                                                                   | 298.00 35.10 0.10 <sup>29</sup>                                                                  |
| <b>DES110.7</b> - PEG200:ThU:Act (1:0.25:2.92)<br>$x_1=0.240, x_2=0.060, x_3=0.700$               | <b>DES110.8</b> - PEG200:ThU:Act (1:0.25:5)<br>$x_1=0.160, x_2=0.040, x_3=0.800$                 |
| 298.00 30.80 0.10 <sup>29</sup>                                                                   | 298.00 25.50 0.10 <sup>29</sup>                                                                  |
| <b>DES110.9</b> - PEG200:ThU:Act (1:0.25:11.25)                                                   | <b>DES110.9</b> - PEG200:ThU:Act (1:0.25:11.25)                                                  |

|        |                                                             |      |  |               |                                                               |
|--------|-------------------------------------------------------------|------|--|---------------|---------------------------------------------------------------|
|        | $x_1 = 0.080, x_2 = 0.020, x_3 = 0.900$                     |      |  |               | $x_1 = 0.720, x_2 = 0.180, x_3 = 0.100$                       |
| 298.00 | 22.22                                                       | 0.10 |  | <sup>29</sup> | 298.00 40.52 0.10 <sup>29</sup>                               |
|        | <b>DES111.2</b> - PEG200:ThU:EtAc (1:0.25:0.31)             |      |  |               | <b>DES111.3</b> - PEG200:ThU:EtAc (1:0.25:0.54)               |
|        | $x_1 = 0.640, x_2 = 0.160, x_3 = 0.200$                     |      |  |               | $x_1 = 0.560, x_2 = 0.140, x_3 = 0.300$                       |
| 298.00 | 35.60                                                       | 0.10 |  | <sup>29</sup> | 298.00 31.94 0.10 <sup>29</sup>                               |
|        | <b>DES111.4</b> - PEG200:ThU:EtAc (1:0.25:0.83)             |      |  |               | <b>DES111.5</b> - PEG200:ThU:EtAc (1:0.25:0.1.25)             |
|        | $x_1 = 0.480, x_2 = 0.120, x_3 = 0.400$                     |      |  |               | $x_1 = 0.400, x_2 = 0.100, x_3 = 0.500$                       |
| 298.00 | 26.63                                                       | 0.10 |  | <sup>29</sup> | 298.00 27.39 0.10 <sup>29</sup>                               |
|        | <b>DES111.6</b> - PEG200:ThU:EtAc (1:0.25:1.88)             |      |  |               | <b>DES111.7</b> - PEG200ThU:EtAc (1:0.25:2.92)                |
|        | $x_1 = 0.320, x_2 = 0.080, x_3 = 0.600$                     |      |  |               | $x_1 = 0.240, x_2 = 0.060, x_3 = 0.700$                       |
| 298.00 | 24.11                                                       | 0.10 |  | <sup>29</sup> | 298.00 22.59 0.10 <sup>29</sup>                               |
|        | <b>DES111.8</b> - PEG200:ThU:EtAc (1:0.25:5)                |      |  |               | <b>DES111.9</b> - PEG200:ThU:EtAc (1:0.25:11.25)              |
|        | $x_1 = 0.160, x_2 = 0.040, x_3 = 0.800$                     |      |  |               | $x_1 = 0.080, x_2 = 0.020, x_3 = 0.900$                       |
| 298.00 | 21.21                                                       | 0.10 |  | <sup>29</sup> | 298.00 20.33 0.10 <sup>29</sup>                               |
|        | <b>DES112.1</b> - PEG200:ThU:Eth (1:0.25:0.14)              |      |  |               | <b>DES112.2</b> - PEG200:ThU:Eth (1:0.25:0.31)                |
|        | $x_1 = 0.720, x_2 = 0.180, x_3 = 0.100$                     |      |  |               | $x_1 = 0.640, x_2 = 0.160, x_3 = 0.200$                       |
| 298.00 | 41.65                                                       | 0.10 |  | <sup>29</sup> | 298.00 40.89 0.10 <sup>29</sup>                               |
|        | <b>DES112.3</b> - PEG200:ThU:Eth (1:0.25:0.54)              |      |  |               | <b>DES112.4</b> - PEG200:ThU:Eth (1:0.25:0.83)                |
|        | $x_1 = 0.560, x_2 = 0.140, x_3 = 0.300$                     |      |  |               | $x_1 = 0.480, x_2 = 0.120, x_3 = 0.400$                       |
| 298.00 | 39.64                                                       | 0.10 |  | <sup>29</sup> | 298.00 37.10 0.10 <sup>29</sup>                               |
|        | <b>DES112.5</b> - PEG200:ThU:Eth (1:0.25:0.1.25)            |      |  |               | <b>DES112.6</b> - PEG200:ThU:Eth (1:0.25:1.88)                |
|        | $x_1 = 0.400, x_2 = 0.100, x_3 = 0.500$                     |      |  |               | $x_1 = 0.320, x_2 = 0.080, x_3 = 0.600$                       |
| 298.00 | 34.84                                                       | 0.10 |  | <sup>29</sup> | 298.00 31.43 0.10 <sup>29</sup>                               |
|        | <b>DES112.7</b> - PEG200:ThU:Eth (1:0.25:2.92)              |      |  |               | <b>DES112.8</b> - PEG200:ThU:Eth (1:0.25:5)                   |
|        | $x_1 = 0.240, x_2 = 0.060, x_3 = 0.700$                     |      |  |               | $x_1 = 0.160, x_2 = 0.040, x_3 = 0.800$                       |
| 298.00 | 27.14                                                       | 0.10 |  | <sup>29</sup> | 298.00 24.00 0.10 <sup>29</sup>                               |
|        | <b>DES112.9</b> - PEG200:ThU:Eth (1:0.25:11.25)             |      |  |               | <b>DES113.1</b> - PEG200:ThU:H <sub>2</sub> O (1:0.25:0.14)   |
|        | $x_1 = 0.080, x_2 = 0.020, x_3 = 0.900$                     |      |  |               | $x_1 = 0.720, x_2 = 0.180, x_3 = 0.100$                       |
| 298.00 | 21.21                                                       | 0.10 |  | <sup>29</sup> | 298.00 45.06 0.10 <sup>29</sup>                               |
|        | <b>DES113.2</b> - PEG200:ThU:H <sub>2</sub> O (1:0.25:0.31) |      |  |               | <b>DES113.3</b> - PEG200:ThU:H <sub>2</sub> O (1:0.25:0.54)   |
|        | $x_1 = 0.640, x_2 = 0.160, x_3 = 0.200$                     |      |  |               | $x_1 = 0.560, x_2 = 0.140, x_3 = 0.300$                       |
| 298.00 | 45.32                                                       | 0.10 |  | <sup>29</sup> | 298.00 45.69 0.10 <sup>29</sup>                               |
|        | <b>DES113.4</b> - PEG200:ThU:H <sub>2</sub> O (1:0.25:0.83) |      |  |               | <b>DES113.5</b> - PEG200:ThU:H <sub>2</sub> O (1:0.25:0.1.25) |
|        | $x_1 = 0.480, x_2 = 0.120, x_3 = 0.400$                     |      |  |               | $x_1 = 0.400, x_2 = 0.100, x_3 = 0.500$                       |
| 298.00 | 45.94                                                       | 0.10 |  | <sup>29</sup> | 298.00 46.31 0.10 <sup>29</sup>                               |
|        | <b>DES113.6</b> - PEG200:ThU:H <sub>2</sub> O (1:0.25:1.88) |      |  |               | <b>DES113.7</b> - PEG200:ThU:H <sub>2</sub> O (1:0.25:2.92)   |
|        | $x_1 = 0.320, x_2 = 0.080, x_3 = 0.600$                     |      |  |               | $x_1 = 0.240, x_2 = 0.060, x_3 = 0.700$                       |
| 298.00 | 46.70                                                       | 0.10 |  | <sup>29</sup> | 298.00 47.44 0.10 <sup>29</sup>                               |
|        | <b>DES113.8</b> - PEG200:ThU:H <sub>2</sub> O (1:0.25:5)    |      |  |               | <b>DES113.9</b> - PEG200:ThU:H <sub>2</sub> O (1:0.25:11.25)  |
|        | $x_1 = 0.160, x_2 = 0.040, x_3 = 0.800$                     |      |  |               | $x_1 = 0.080, x_2 = 0.020, x_3 = 0.900$                       |
| 298.00 | 48.85                                                       | 0.10 |  | <sup>29</sup> | 298.00 49.98 0.10 <sup>29</sup>                               |
|        | <b>DES114.1</b> - PEG200:ThU:IsoOH (1:0.25:0.14)            |      |  |               | <b>DES114.2</b> - PEG200:ThU:IsoOH (1:0.25:0.31)              |
|        | $x_1 = 0.720, x_2 = 0.180, x_3 = 0.100$                     |      |  |               | $x_1 = 0.640, x_2 = 0.160, x_3 = 0.200$                       |
| 298.00 | 39.64                                                       | 0.10 |  | <sup>29</sup> | 298.00 36.60 0.10 <sup>29</sup>                               |
|        | <b>DES114.3</b> - PEG200:ThU:IsoOH (1:0.25:0.54)            |      |  |               | <b>DES114.4</b> - PEG200:ThU:IsoOH (1:0.25:0.83)              |
|        | $x_1 = 0.560, x_2 = 0.140, x_3 = 0.300$                     |      |  |               | $x_1 = 0.480, x_2 = 0.120, x_3 = 0.400$                       |
| 298.00 | 34.20                                                       | 0.10 |  | <sup>29</sup> | 298.00 30.80 0.10 <sup>29</sup>                               |
|        | <b>DES114.5</b> - PEG200:ThU:IsoOH (1:0.25:0.1.25)          |      |  |               | <b>DES114.6</b> - PEG200:ThU:IsoOH (1:0.25:1.88)              |
|        | $x_1 = 0.400, x_2 = 0.100, x_3 = 0.500$                     |      |  |               | $x_1 = 0.320, x_2 = 0.080, x_3 = 0.600$                       |
| 298.00 | 28.15                                                       | 0.10 |  | <sup>29</sup> | 298.00 25.38 0.10 <sup>29</sup>                               |
|        | <b>DES114.7</b> - PEG200:ThU:IsoOH (1:0.25:2.92)            |      |  |               | <b>DES114.8</b> - PEG200:ThU:IsoOH (1:0.25:5)                 |
|        | $x_1 = 0.240, x_2 = 0.060, x_3 = 0.700$                     |      |  |               | $x_1 = 0.160, x_2 = 0.040, x_3 = 0.800$                       |
| 298.00 | 22.85                                                       | 0.10 |  | <sup>29</sup> | 298.00 20.21 0.10 <sup>29</sup>                               |
|        | <b>DES114.9</b> - PEG200:ThU:IsoOH (1:0.25:11.25)           |      |  |               | <b>DES115</b> - PEG200:ThU (4:1)                              |
|        | $x_1 = 0.080, x_2 = 0.020, x_3 = 0.900$                     |      |  |               | $x_1 = 0.800, x_2 = 0.200, x_3 = 0.000$                       |
| 298.00 | 18.81                                                       | 0.10 |  | <sup>29</sup> | 298.00 45.08 0.10                                             |
|        |                                                             |      |  |               | 308.00 44.21 0.10                                             |
|        |                                                             |      |  |               | 318.00 43.42 0.10 <sup>29</sup>                               |
|        |                                                             |      |  |               | 328.00 42.69 0.10                                             |
|        |                                                             |      |  |               | 338.00 41.79 0.10                                             |
|        | <b>DES116.1</b> - PEG400:ThU:Act (1:0.25:0.14)              |      |  |               | <b>DES116.2</b> - PEG400:ThU:Act (1:0.25:0.31)                |
|        | $x_1 = 0.720, x_2 = 0.180, x_3 = 0.100$                     |      |  |               | $x_1 = 0.640, x_2 = 0.160, x_3 = 0.200$                       |
| 298.00 | 44.04                                                       | 0.10 |  | <sup>29</sup> | 298.00 43.56 0.10 <sup>29</sup>                               |
|        | <b>DES116.3</b> - PEG400:ThU:Act (1:0.25:0.54)              |      |  |               | <b>DES116.4</b> - PEG400:ThU:Act (1:0.25:0.83)                |
|        | $x_1 = 0.560, x_2 = 0.140, x_3 = 0.300$                     |      |  |               | $x_1 = 0.480, x_2 = 0.120, x_3 = 0.400$                       |
| 298.00 | 43.31                                                       | 0.10 |  | <sup>29</sup> | 298.00 42.12 0.10 <sup>29</sup>                               |
|        | <b>DES116.5</b> - PEG400:ThU:Act (1:0.25:0.1.25)            |      |  |               | <b>DES116.6</b> - PEG400:ThU:Act (1:0.25:1.88)                |
|        | $x_1 = 0.400, x_2 = 0.100, x_3 = 0.500$                     |      |  |               | $x_1 = 0.320, x_2 = 0.080, x_3 = 0.600$                       |
| 298.00 | 39.74                                                       | 0.10 |  | <sup>29</sup> | 298.00 37.47 0.10 <sup>29</sup>                               |
|        | <b>DES116.7</b> - PEG400:ThU:Act (1:0.25:2.92)              |      |  |               | <b>DES116.8</b> - PEG400:ThU:Act (1:0.25:5)                   |

|        |                                                             |      |               |        |                                                               |
|--------|-------------------------------------------------------------|------|---------------|--------|---------------------------------------------------------------|
|        | $x_1 = 0.240, x_2 = 0.060, x_3 = 0.700$                     |      |               |        | $x_1 = 0.160, x_2 = 0.040, x_3 = 0.800$                       |
| 298.00 | 34.72                                                       | 0.10 | <sup>29</sup> | 298.00 | 29.10 0.10 <sup>29</sup>                                      |
|        | <b>DES116.9</b> - PEG400:ThU:Act (1:0.25:11.25)             |      |               |        | <b>DES117.1</b> - PEG400:ThU:EtAc (1:0.25:0.14)               |
|        | $x_1 = 0.080, x_2 = 0.020, x_3 = 0.900$                     |      |               |        | $x_1 = 0.720, x_2 = 0.180, x_3 = 0.100$                       |
| 298.00 | 23.02                                                       | 0.10 | <sup>29</sup> | 298.00 | 42.84 0.10 <sup>29</sup>                                      |
|        | <b>DES117.2</b> - PEG400:ThU:EtAc (1:0.25:0.31)             |      |               |        | <b>DES117.3</b> - PEG400:ThU:EtAc (1:0.25:0.54)               |
|        | $x_1 = 0.640, x_2 = 0.160, x_3 = 0.200$                     |      |               |        | $x_1 = 0.560, x_2 = 0.140, x_3 = 0.300$                       |
| 298.00 | 40.57                                                       | 0.10 | <sup>29</sup> | 298.00 | 37.94 0.10 <sup>29</sup>                                      |
|        | <b>DES117.4</b> - PEG400:ThU:EtAc (1:0.25:0.83)             |      |               |        | <b>DES117.5</b> - PEG400:ThU:EtAc (1:0.25:0.1.25)             |
|        | $x_1 = 0.480, x_2 = 0.120, x_3 = 0.400$                     |      |               |        | $x_1 = 0.400, x_2 = 0.100, x_3 = 0.500$                       |
| 298.00 | 33.77                                                       | 0.10 | <sup>29</sup> | 298.00 | 33.65 0.10 <sup>29</sup>                                      |
|        | <b>DES117.6</b> - PEG400:ThU:EtAc (1:0.25:1.88)             |      |               |        | <b>DES117.7</b> - PEG400:ThU:EtAc (1:0.25:2.92)               |
|        | $x_1 = 0.320, x_2 = 0.080, x_3 = 0.600$                     |      |               |        | $x_1 = 0.240, x_2 = 0.060, x_3 = 0.700$                       |
| 298.00 | 32.22                                                       | 0.10 | <sup>29</sup> | 298.00 | 27.67 0.10 <sup>29</sup>                                      |
|        | <b>DES117.8</b> - PEG400:ThU:EtAc (1:0.25:5)                |      |               |        | <b>DES117.9</b> - PEG400:ThU:EtAc (1:0.25:11.25)              |
|        | $x_1 = 0.160, x_2 = 0.040, x_3 = 0.800$                     |      |               |        | $x_1 = 0.080, x_2 = 0.020, x_3 = 0.900$                       |
| 298.00 | 22.90                                                       | 0.10 | <sup>29</sup> | 298.00 | 21.46 0.10 <sup>29</sup>                                      |
|        | <b>DES118.1</b> - PEG400:ThU:Eth (1:0.25:0.14)              |      |               |        | <b>DES118.2</b> - PEG400:ThU:Eth (1:0.25:0.31)                |
|        | $x_1 = 0.720, x_2 = 0.180, x_3 = 0.100$                     |      |               |        | $x_1 = 0.640, x_2 = 0.160, x_3 = 0.200$                       |
| 298.00 | 43.68                                                       | 0.10 | <sup>29</sup> | 298.00 | 42.72 0.10 <sup>29</sup>                                      |
|        | <b>DES118.3</b> - PEG400:ThU:Eth (1:0.25:0.54)              |      |               |        | <b>DES118.4</b> - PEG400:ThU:Eth (1:0.25:0.83)                |
|        | $x_1 = 0.560, x_2 = 0.140, x_3 = 0.300$                     |      |               |        | $x_1 = 0.480, x_2 = 0.120, x_3 = 0.400$                       |
| 298.00 | 40.09                                                       | 0.10 | <sup>29</sup> | 298.00 | 39.26 0.10 <sup>29</sup>                                      |
|        | <b>DES118.5</b> - PEG400:ThU:Eth (1:0.25:0.1.25)            |      |               |        | <b>DES118.6</b> - PEG400:ThU:Eth (1:0.25:1.88)                |
|        | $x_1 = 0.400, x_2 = 0.100, x_3 = 0.500$                     |      |               |        | $x_1 = 0.320, x_2 = 0.080, x_3 = 0.600$                       |
| 298.00 | 36.04                                                       | 0.10 | <sup>29</sup> | 298.00 | 31.97 0.10 <sup>29</sup>                                      |
|        | <b>DES118.7</b> - PEG400:ThU:Eth (1:0.25:2.92)              |      |               |        | <b>DES118.8</b> - PEG400:ThU:Eth (1:0.25:5)                   |
|        | $x_1 = 0.240, x_2 = 0.060, x_3 = 0.700$                     |      |               |        | $x_1 = 0.160, x_2 = 0.040, x_3 = 0.800$                       |
| 298.00 | 27.80                                                       | 0.10 | <sup>29</sup> | 298.00 | 23.98 0.10 <sup>29</sup>                                      |
|        | <b>DES118.9</b> - PEG400:ThU:Eth (1:0.25:11.25)             |      |               |        | <b>DES119.1</b> - PEG400:ThU:H <sub>2</sub> O (1:0.25:0.14)   |
|        | $x_1 = 0.080, x_2 = 0.020, x_3 = 0.900$                     |      |               |        | $x_1 = 0.720, x_2 = 0.180, x_3 = 0.100$                       |
| 298.00 | 19.43                                                       | 0.10 | <sup>29</sup> | 298.00 | 41.29 0.10 <sup>29</sup>                                      |
|        | <b>DES119.2</b> - PEG400:ThU:H <sub>2</sub> O (1:0.25:0.31) |      |               |        | <b>DES119.3</b> - PEG400:ThU:H <sub>2</sub> O (1:0.25:0.54)   |
|        | $x_1 = 0.640, x_2 = 0.160, x_3 = 0.200$                     |      |               |        | $x_1 = 0.560, x_2 = 0.140, x_3 = 0.300$                       |
| 298.00 | 41.76                                                       | 0.10 | <sup>29</sup> | 298.00 | 41.89 0.10 <sup>29</sup>                                      |
|        | <b>DES119.4</b> - PEG400:ThU:H <sub>2</sub> O (1:0.25:0.83) |      |               |        | <b>DES119.5</b> - PEG400:ThU:H <sub>2</sub> O (1:0.25:0.1.25) |
|        | $x_1 = 0.480, x_2 = 0.120, x_3 = 0.400$                     |      |               |        | $x_1 = 0.400, x_2 = 0.100, x_3 = 0.500$                       |
| 298.00 | 42.12                                                       | 0.10 | <sup>29</sup> | 298.00 | 41.64 0.10 <sup>29</sup>                                      |
|        | <b>DES119.6</b> - PEG400:ThU:H <sub>2</sub> O (1:0.25:1.88) |      |               |        | <b>DES119.7</b> - PEG400:ThU:H <sub>2</sub> O (1:0.25:2.92)   |
|        | $x_1 = 0.320, x_2 = 0.080, x_3 = 0.600$                     |      |               |        | $x_1 = 0.240, x_2 = 0.060, x_3 = 0.700$                       |
| 298.00 | 40.69                                                       | 0.10 | <sup>29</sup> | 298.00 | 39.14 0.10 <sup>29</sup>                                      |
|        | <b>DES119.8</b> - PEG400:ThU:H <sub>2</sub> O (1:0.25:5)    |      |               |        | <b>DES119.9</b> - PEG400:ThU:H <sub>2</sub> O (1:0.25:11.25)  |
|        | $x_1 = 0.160, x_2 = 0.040, x_3 = 0.800$                     |      |               |        | $x_1 = 0.080, x_2 = 0.020, x_3 = 0.900$                       |
| 298.00 | 38.89                                                       | 0.10 | <sup>29</sup> | 298.00 | 36.15 0.10 <sup>29</sup>                                      |
|        | <b>DES120.1</b> - PEG400:ThU:IsoOH (1:0.25:0.14)            |      |               |        | <b>DES120.2</b> - PEG400:ThU:IsoOH (1:0.25:0.31)              |
|        | $x_1 = 0.720, x_2 = 0.180, x_3 = 0.100$                     |      |               |        | $x_1 = 0.640, x_2 = 0.160, x_3 = 0.200$                       |
| 298.00 | 42.12                                                       | 0.10 | <sup>29</sup> | 298.00 | 38.89 0.10 <sup>29</sup>                                      |
|        | <b>DES120.3</b> - PEG400:ThU:IsoOH (1:0.25:0.54)            |      |               |        | <b>DES120.4</b> - PEG400:ThU:IsoOH (1:0.25:0.83)              |
|        | $x_1 = 0.560, x_2 = 0.140, x_3 = 0.300$                     |      |               |        | $x_1 = 0.480, x_2 = 0.120, x_3 = 0.400$                       |
| 298.00 | 35.79                                                       | 0.10 | <sup>29</sup> | 298.00 | 34.12 0.10 <sup>29</sup>                                      |
|        | <b>DES120.5</b> - PEG400:ThU:IsoOH (1:0.25:0.1.25)          |      |               |        | <b>DES120.6</b> - PEG400:ThU:IsoOH (1:0.25:1.88)              |
|        | $x_1 = 0.400, x_2 = 0.100, x_3 = 0.500$                     |      |               |        | $x_1 = 0.320, x_2 = 0.080, x_3 = 0.600$                       |
| 298.00 | 31.25                                                       | 0.10 | <sup>29</sup> | 298.00 | 28.50 0.10 <sup>29</sup>                                      |
|        | <b>DES120.7</b> - PEG400:ThU:IsoOH (1:0.25:2.92)            |      |               |        | <b>DES120.8</b> - PEG400:ThU:IsoOH (1:0.25:5)                 |
|        | $x_1 = 0.240, x_2 = 0.060, x_3 = 0.700$                     |      |               |        | $x_1 = 0.160, x_2 = 0.040, x_3 = 0.800$                       |
| 298.00 | 24.57                                                       | 0.10 | <sup>29</sup> | 298.00 | 19.78 0.10 <sup>29</sup>                                      |
|        | <b>DES120.9</b> - PEG400:ThU:IsoOH (1:0.25:11.25)           |      |               |        | <b>DES121</b> - PEG400:ThU (4:1)                              |
|        | $x_1 = 0.080, x_2 = 0.02, x_3 = 0.900$                      |      |               |        | $x_1 = 0.800, x_2 = 0.200, x_3 = 0.000$                       |
| 298.00 | 18.13                                                       | 0.10 | <sup>29</sup> | 298.00 | 42.22 0.10                                                    |
|        |                                                             |      |               | 308.00 | 41.93 0.10                                                    |
|        |                                                             |      |               | 318.00 | 41.83 0.10 <sup>29</sup>                                      |
|        |                                                             |      |               | 328.00 | 41.10 0.10                                                    |
|        |                                                             |      |               | 338.00 | 40.70 0.10                                                    |
|        | <b>DES122</b> - Thy:bor (7:3)                               |      |               |        | <b>DES123</b> - Thy:CaA (1:2)                                 |
|        | $x_1 = 0.700, x_2 = 0.300, x_3 = 0.000$                     |      |               |        | $x_1 = 0.333, x_2 = 0.667, x_3 = 0.000$                       |
| 298.15 | 31.75                                                       | 0.01 | <sup>39</sup> | 298.15 | 28.43 - <sup>40</sup>                                         |
|        | <b>DES124</b> - Thy:Cam (1:1)                               |      |               |        | <b>DES125</b> - Thy:CapA (1:1)                                |
|        | $x_1 = 0.500, x_2 = 0.500, x_3 = 0.000$                     |      |               |        | $x_1 = 0.500, x_2 = 0.500, x_3 = 0.000$                       |
| 298.15 | 30.35                                                       | 0.06 | <sup>39</sup> | 298.15 | 29.09 - <sup>40</sup>                                         |
|        | <b>DES126</b> - TMG:FuA (2:1)                               |      |               |        | <b>DES127</b> - TMG:GlyA (2:1)                                |

|                                                                                     |       |   |    |                                                                                   |       |   |    |
|-------------------------------------------------------------------------------------|-------|---|----|-----------------------------------------------------------------------------------|-------|---|----|
| $x_1=0.667, x_2=0.333, x_3=0.000$                                                   |       |   |    | $x_1=0.667, x_2=0.333, x_3=0.000$                                                 |       |   |    |
| 298.15                                                                              | 32.30 | - | 43 | 298.15                                                                            | 55.92 | - | 43 |
| <b>DES128</b> - TMG:ManA (1:1)<br>$x_1=0.333, x_2=0.667, x_3=0.000$                 |       |   |    | <b>DES129</b> - TMG:PAA (2:1)<br>$x_1=0.500, x_2=0.500, x_3=0.000$                |       |   |    |
| 298.15                                                                              | 64.50 | - | 43 | 298.15                                                                            | 40.74 | - | 43 |
| <b>DES130</b> - ZnCl <sub>2</sub> :Ace (1:4)<br>$x_1=0.200, x_2=0.800, x_3=0.000$   |       |   |    | <b>DES131</b> - ZnCl <sub>2</sub> :EG (1:4)<br>$x_1=0.200, x_2=0.800, x_3=0.000$  |       |   |    |
| 293.02                                                                              | 53.00 | - |    | 293.02                                                                            | 57.90 | - |    |
| 296.01                                                                              | 52.18 | - |    | 295.02                                                                            | 57.14 | - |    |
| 298.01                                                                              | 51.60 | - | 44 | 298.01                                                                            | 56.56 | - | 44 |
| 300.99                                                                              | 51.02 | - |    | 301.02                                                                            | 54.93 | - |    |
| 303.00                                                                              | 50.49 | - |    | 305.98                                                                            | 53.59 | - |    |
| 307.02                                                                              | 49.04 | - |    |                                                                                   |       |   |    |
| <b>DES132</b> - ZnCl <sub>2</sub> :HexOH (1:3)<br>$x_1=0.250, x_2=0.750, x_3=0.000$ |       |   |    | <b>DES133</b> - ZnCl <sub>2</sub> :U (1:3.5)<br>$x_1=0.222, x_2=0.778, x_3=0.000$ |       |   |    |
| 297.02                                                                              | 49.44 | - |    | 296.01                                                                            | 73.12 | - |    |
| 298.04                                                                              | 48.16 | - |    | 298.01                                                                            | 71.95 | - | 44 |
| 299.02                                                                              | 47.52 | - | 44 | 300.99                                                                            | 70.20 | - |    |
| 299.98                                                                              | 47.11 | - |    | 303.02                                                                            | 68.80 | - |    |
| 300.99                                                                              | 46.59 | - |    |                                                                                   |       |   |    |
| 303.00                                                                              | 45.71 | - |    |                                                                                   |       |   |    |

**Table S.2.** The surface tension of the 520 DES compositions at 298 K and 100 kPa.

| #                     | DESS                          | $x_1$ | $x_2$ | $x_3$ | $x_4$ | T, K   | $\gamma/\text{mN.m}^{-1}$ | Ref. |
|-----------------------|-------------------------------|-------|-------|-------|-------|--------|---------------------------|------|
| DES1 (1:2)            | [AcCh][Cl]:U                  | 0.333 | 0.667 | -     | -     | 313.15 | 65.10                     | 1    |
| DES2.1 (1:10)         | [ATPP][Br]:DEG                | 0.091 | 0.909 | -     | -     | 298.15 | 46.34                     | 2    |
| DES2.2 (1:4)          | [ATPP][Br]:DEG                | 0.200 | 0.800 | -     | -     | 298.15 | 49.37                     | 2    |
| DES3.1 (1:16)         | [ATPP][Br]:TEG                | 0.059 | 0.941 | -     | -     | 303.15 | 47.68                     | 3    |
| DES3.2 (1:10)         | [ATPP][Br]:TEG                | 0.091 | 0.909 | -     | -     | 298.15 | 46.21                     | 3    |
| DES4 (1:2)            | [BA][Br]:Gly                  | 0.333 | 0.667 | -     | -     | 298.15 | 44.90                     | 4    |
| DES5 (1:7)            | [BTP][Cl]:DEG                 | 0.125 | 0.875 | -     | -     | 293.00 | 66.68                     | 5    |
| DES6 (1:11)           | [BTP][Cl]:EG                  | 0.250 | 0.750 | -     | -     | 298.15 | 66.93                     | 6    |
| DES7.1 (1:19)         | [Ch][Cl]:1,2-ButOH            | 0.050 | 0.950 | -     | -     | 293.00 | 32.90                     | 7    |
| DES7.2 (1:9)          | [Ch][Cl]:1,2-ButOH            | 0.100 | 0.900 | -     | -     | 293.00 | 33.70                     | 7    |
| DES7.3 (1:5.67)       | [Ch][Cl]:1,2-ButOH            | 0.150 | 0.850 | -     | -     | 293.00 | 34.20                     | 7    |
| DES7.4 (1:4)          | [Ch][Cl]:1,2-ButOH            | 0.200 | 0.800 | -     | -     | 293.00 | 34.70                     | 7    |
| DES8.1 (1:19)         | [Ch][Cl]:1,3-ButOH            | 0.050 | 0.950 | -     | -     | 293.00 | 34.40                     | 7    |
| DES8.2 (1:9)          | [Ch][Cl]:1,3-ButOH            | 0.100 | 0.900 | -     | -     | 293.00 | 38.20                     | 7    |
| DES8.3 (1:5.67)       | [Ch][Cl]:1,3-ButOH            | 0.150 | 0.850 | -     | -     | 293.00 | 39.00                     | 7    |
| DES8.4 (1:4)          | [Ch][Cl]:1,3-ButOH            | 0.200 | 0.800 | -     | -     | 293.00 | 40.10                     | 7    |
| DES9.1 (1:19)         | [Ch][Cl]:1,4-ButOH            | 0.050 | 0.950 | -     | -     | 293.00 | 46.40                     | 7    |
| DES9.2 (1:9)          | [Ch][Cl]:1,4-ButOH            | 0.100 | 0.900 | -     | -     | 293.00 | 46.80                     | 7    |
| DES9.3 (1:5.67)       | [Ch][Cl]:1,4-ButOH            | 0.150 | 0.850 | -     | -     | 293.00 | 46.90                     | 7    |
| DES9.4 (1:4)          | [Ch][Cl]:1,4-ButOH            | 0.200 | 0.800 | -     | -     | 293.00 | 47.40                     | 7    |
| DES9.5 (1:3)          | [Ch][Cl]:1,4-ButOH            | 0.250 | 0.750 | -     | -     | 293.00 | 47.60                     | 7    |
| DES10.1 (1:19)        | [Ch][Cl]:2,3-ButOH            | 0.050 | 0.950 | -     | -     | 293.00 | 34.20                     | 7    |
| DES10.2 (1:9)         | [Ch][Cl]:2,3-ButOH            | 0.100 | 0.900 | -     | -     | 293.00 | 34.50                     | 7    |
| DES10.3 (1:5.67)      | [Ch][Cl]:2,3-ButOH            | 0.150 | 0.850 | -     | -     | 293.00 | 35.10                     | 7    |
| DES10.4 (1:4)         | [Ch][Cl]:2,3-ButOH            | 0.200 | 0.800 | -     | -     | 293.00 | 35.60                     | 7    |
| DES11 (1:1)           | [Ch][Cl]:BA                   | 0.500 | 0.500 | -     | -     | 333.15 | 51.53                     | 8    |
| DES12.1 (1:2:10.5)    | [Ch][Cl]:CA:H <sub>2</sub> O  | 0.074 | 0.149 | 0.777 | -     | 313.15 | 60.35                     | 9    |
| DES12.2 (1.01:1:6.05) | [Ch][Cl]:CA:H <sub>2</sub> O  | 0.125 | 0.124 | 0.751 | -     | 278.15 | 70.49                     | 10   |
| DES13 (1:2)           | [Ch][Cl]:CA                   | 0.333 | 0.667 | -     | -     | 313.15 | 60.35                     | 11   |
| DES14 (1:2)           | [Ch][Cl]:DEG                  | 0.333 | 0.667 | -     | -     | 293.00 | 48.40                     | 5    |
| DES15 (1:1)           | [Ch][Cl]:DGA                  | 0.500 | 0.500 | -     | -     | 303.15 | 67.69                     | 12   |
| DES16 (1:1.98:0.95)   | [Ch][Cl]:EG:H <sub>2</sub> O  | 0.254 | 0.504 | 0.242 | -     | 278.15 | 56.90                     | 13   |
| DES17.1 (1:19)        | [Ch][Cl]:EG                   | 0.050 | 0.950 | -     | -     | 277.00 | 48.00                     | 7    |
| DES17.2 (1:9)         | [Ch][Cl]:EG                   | 0.100 | 0.900 | -     | -     | 277.00 | 49.50                     | 7    |
| DES17.3 (1:6)         | [Ch][Cl]:EG                   | 0.143 | 0.857 | -     | -     | 298.15 | 46.90                     | 14   |
| DES17.4 (1:5.67)      | [Ch][Cl]:EG                   | 0.150 | 0.850 | -     | -     | 277.00 | 51.40                     | 7    |
| DES17.5 (1:4)         | [Ch][Cl]:EG                   | 0.200 | 0.800 | -     | -     | 277.00 | 50.60                     | 7    |
| DES17.6 (1:3)         | [Ch][Cl]:EG                   | 0.250 | 0.750 | -     | -     | 277.00 | 50.80                     | 7    |
| DES17.7 (1:2.33)      | [Ch][Cl]:EG                   | 0.300 | 0.700 | -     | -     | 277.00 | 49.60                     | 7    |
| DES17.8 (1:2)         | [Ch][Cl]:EG                   | 0.333 | 0.667 | -     | -     | 277.00 | 50.00                     | 7    |
| DES18.1 (1:1)         | [Ch][Cl]:Fru                  | 0.500 | 0.500 | -     | -     | 298.15 | 70.40                     | 15   |
| DES18.2 (1.5:1)       | [Ch][Cl]:Fru                  | 0.600 | 0.400 | -     | -     | 298.15 | 73.60                     | 15   |
| DES18.3 (2:1)         | [Ch][Cl]:Fru                  | 0.667 | 0.333 | -     | -     | 298.15 | 74.00                     | 15   |
| DES18.4 (2.5:1)       | [Ch][Cl]:Fru                  | 0.714 | 0.286 | -     | -     | 298.15 | 75.00                     | 15   |
| DES19 (3:1:3)         | [Ch][Cl]:Glu:H <sub>2</sub> O | 0.429 | 0.143 | 0.429 | -     | 298.15 | 78.70                     | 16   |
| DES20.1 (1:1)         | [Ch][Cl]:Glu                  | 0.500 | 0.500 | -     | -     | 293.15 | 73.10                     | 17   |



|                         |                                        |       |       |       |       |        |       |       |
|-------------------------|----------------------------------------|-------|-------|-------|-------|--------|-------|-------|
| DES20.2 (1.5:1)         | [Ch][Cl]:Glu                           | 0.600 | 0.400 | -     | -     | 293.15 | 72.70 | 17    |
| DES20.3 (1:2)           | [Ch][Cl]:Glu                           | 0.333 | 0.667 | -     | -     | 298.15 | 71.71 | 18    |
| DES20.4 (2:1)           | [Ch][Cl]:Glu                           | 0.667 | 0.333 | -     | -     | 293.15 | 71.70 | 17,19 |
| DES20.5 (2.5:1)         | [Ch][Cl]:Glu                           | 0.714 | 0.286 | -     | -     | 293.15 | 75.00 | 17    |
| DES21 (1:2:5.5:1)       | [Ch][Cl]:Gly:H <sub>2</sub> O          | 0.118 | 0.235 | 0.647 | -     | 313.15 | 56.12 | 9     |
| DES22.1 (1:19)          | [Ch][Cl]:Gly                           | 0.050 | 0.950 | -     | -     | 293.00 | 63.70 | 7     |
| DES22.2 (1:9)           | [Ch][Cl]:Gly                           | 0.150 | 0.850 | -     | -     | 293.00 | 61.60 | 7     |
| DES22.3 (1:5.67)        | [Ch][Cl]:Gly                           | 0.150 | 0.850 | -     | -     | 293.00 | 60.80 | 7     |
| DES22.4 (1:4)           | [Ch][Cl]:Gly                           | 0.200 | 0.800 | -     | -     | 293.00 | 57.40 | 7     |
| DES22.5 (1:3)           | [Ch][Cl]:Gly                           | 0.250 | 0.750 | -     | -     | 293.00 | 50.80 | 7     |
| DES22.6 (1:2.33)        | [Ch][Cl]:Gly                           | 0.250 | 0.750 | -     | -     | 293.00 | 48.50 | 7     |
| DES22.7 (1:2)           | [Ch][Cl]:Gly                           | 0.250 | 0.750 | -     | -     | 293.00 | 55.80 | 7     |
| DES23.1 (1:19)          | [Ch][Cl]:HexOH                         | 0.050 | 0.950 | -     | -     | 316.50 | 42.30 | 7     |
| DES23.2 (1:9)           | [Ch][Cl]:HexOH                         | 0.150 | 0.850 | -     | -     | 316.50 | 42.60 | 7     |
| DES23.3 (1:5.67)        | [Ch][Cl]:HexOH                         | 0.150 | 0.850 | -     | -     | 316.50 | 42.80 | 7     |
| DES23.4 (1:4)           | [Ch][Cl]:HexOH                         | 0.200 | 0.800 | -     | -     | 316.50 | 43.20 | 7     |
| DES23.5 (1:3)           | [Ch][Cl]:HexOH                         | 0.250 | 0.750 | -     | -     | 316.50 | 43.60 | 7     |
| DES24 (1:2:5.2:6)       | [Ch][Cl]:LacA:H <sub>2</sub> O         | 0.121 | 0.242 | 0.637 | -     | 313.15 | 42.42 | 9     |
| DES25 (1:2)             | [Ch][Cl]:LacA                          | 0.333 | 0.667 | -     | -     | 298.20 | 48.00 | 20    |
| DES26 (1:2)             | [Ch][Cl]:LevA                          | 0.333 | 0.667 | -     | -     | 298.15 | 39.35 | 21    |
| DES27 (1:2:18.54)       | [Ch][Cl]:Mal:H <sub>2</sub> O          | 0.046 | 0.093 | 0.861 | -     | 313.15 | 74.49 | 9     |
| DES28.1 (1:1:20)        | [Ch][Cl]:MalA:H <sub>2</sub> O         | 0.045 | 0.045 | 0.909 | -     | 323.15 | 68.20 | 22    |
| DES28.2 (1:1:10)        | [Ch][Cl]:MalA:H <sub>2</sub> O         | 0.083 | 0.083 | 0.833 | -     | 323.15 | 59.90 | 22    |
| DES28.3 (1:1:5)         | [Ch][Cl]:MalA:H <sub>2</sub> O         | 0.143 | 0.143 | 0.714 | -     | 323.15 | 57.10 | 22    |
| DES28.4 (1:1:2)         | [Ch][Cl]:MalA:H <sub>2</sub> O         | 0.250 | 0.250 | 0.500 | -     | 323.15 | 62.80 | 22    |
| DES29 (1:1)             | [Ch][Cl]:MalA                          | 0.500 | 0.500 | -     | -     | 323.15 | 64.40 | 23    |
| DES30.1 (1:8)           | [Ch][Cl]:MEA                           | 0.110 | 0.890 | -     | -     | 298.15 | 49.60 | 24    |
| DES30.2 (1:7)           | [Ch][Cl]:MEA                           | 0.130 | 0.870 | -     | -     | 298.15 | 49.20 | 24    |
| DES30.3 (1:6)           | [Ch][Cl]:MEA                           | 0.140 | 0.860 | -     | -     | 298.15 | 48.70 | 24    |
| DES30.4 (1:5)           | [Ch][Cl]:MEA                           | 0.160 | 0.840 | -     | -     | 298.15 | 48.20 | 24    |
| DES31 (1:0.75)          | [Ch][Cl]:Nin                           | 0.571 | 0.429 | -     | -     | 308.15 | 63.70 | 25    |
| DES32 (1:1:2)           | [Ch][Cl]:OA:H <sub>2</sub> O           | 0.250 | 0.250 | 0.500 | -     | 298.15 | 60.80 | 26    |
| DES33 (1:2)             | [Ch][Cl]:OA                            | 0.333 | 0.667 | -     | -     | 298.15 | 75.30 | 27    |
| DES34 (2:1)             | [Ch][Cl]:PAA                           | 0.667 | 0.333 | -     | -     | 298.15 | 41.86 | 28    |
| DES35.1 (1:4:45)        | [Ch][Cl]:PEG200:Act                    | 0.020 | 0.080 | 0.900 | -     | 298.00 | 22.55 | 29    |
| DES35.2 (1:4:20)        | [Ch][Cl]:PEG200:Act                    | 0.040 | 0.160 | 0.800 | -     | 298.00 | 26.99 | 29    |
| DES35.3 (1:4:11.67)     | [Ch][Cl]:PEG200:Act                    | 0.060 | 0.240 | 0.700 | -     | 298.00 | 35.74 | 29    |
| DES35.4 (1:4:7.5)       | [Ch][Cl]:PEG200:Act                    | 0.080 | 0.320 | 0.600 | -     | 298.00 | 37.90 | 29    |
| DES35.5 (1:4:5)         | [Ch][Cl]:PEG200:Act                    | 0.100 | 0.400 | 0.500 | -     | 298.00 | 38.17 | 29    |
| DES35.6 (1:4:3.33)      | [Ch][Cl]:PEG200:Act                    | 0.120 | 0.480 | 0.400 | -     | 298.00 | 39.91 | 29    |
| DES35.7 (1:4:2.14)      | [Ch][Cl]:PEG200:Act                    | 0.140 | 0.560 | 0.300 | -     | 298.00 | 41.93 | 29    |
| DES35.8 (1:4:1.25)      | [Ch][Cl]:PEG200:Act                    | 0.160 | 0.640 | 0.200 | -     | 298.00 | 43.68 | 29    |
| DES35.9 (1:4:0.56)      | [Ch][Cl]:PEG200:Act                    | 0.180 | 0.720 | 0.100 | -     | 298.00 | 45.56 | 29    |
| DES36.1 (1:4:45)        | [Ch][Cl]:PEG200:EtAc                   | 0.020 | 0.080 | 0.900 | -     | 298.00 | 20.26 | 29    |
| DES36.2 (1:4:20)        | [Ch][Cl]:PEG200:EtAc                   | 0.040 | 0.160 | 0.800 | -     | 298.00 | 21.21 | 29    |
| DES36.3 (1:4:11.67)     | [Ch][Cl]:PEG200:EtAc                   | 0.060 | 0.240 | 0.700 | -     | 298.00 | 21.35 | 29    |
| DES36.4 (1:4:7.5)       | [Ch][Cl]:PEG200:EtAc                   | 0.080 | 0.320 | 0.600 | -     | 298.00 | 27.54 | 29    |
| DES36.5 (1:4:5)         | [Ch][Cl]:PEG200:EtAc                   | 0.100 | 0.400 | 0.500 | -     | 298.00 | 29.01 | 29    |
| DES36.6 (1:4:3.33)      | [Ch][Cl]:PEG200:EtAc                   | 0.120 | 0.480 | 0.400 | -     | 298.00 | 33.72 | 29    |
| DES36.7 (1:4:2.14)      | [Ch][Cl]:PEG200:EtAc                   | 0.140 | 0.560 | 0.300 | -     | 298.00 | 36.69 | 29    |
| DES36.8 (1:4:1.25)      | [Ch][Cl]:PEG200:EtAc                   | 0.160 | 0.640 | 0.200 | -     | 298.00 | 39.91 | 29    |
| DES36.9 (1:4:0.56)      | [Ch][Cl]:PEG200:EtAc                   | 0.180 | 0.720 | 0.100 | -     | 298.00 | 43.54 | 29    |
| DES37.1 (1:4:45)        | [Ch][Cl]:PEG200:Eth                    | 0.020 | 0.080 | 0.900 | -     | 298.00 | 20.94 | 29    |
| DES37.2 (1:4:20)        | [Ch][Cl]:PEG200:Eth                    | 0.040 | 0.160 | 0.800 | -     | 298.00 | 24.70 | 29    |
| DES37.3 (1:4:11.67)     | [Ch][Cl]:PEG200:Eth                    | 0.060 | 0.240 | 0.700 | -     | 298.00 | 29.83 | 29    |
| DES37.4 (1:4:7.5)       | [Ch][Cl]:PEG200:Eth                    | 0.080 | 0.320 | 0.600 | -     | 298.00 | 33.32 | 29    |
| DES37.5 (1:4:5)         | [Ch][Cl]:PEG200:Eth                    | 0.100 | 0.400 | 0.500 | -     | 298.00 | 34.13 | 29    |
| DES37.6 (1:4:3.33)      | [Ch][Cl]:PEG200:Eth                    | 0.120 | 0.480 | 0.400 | -     | 298.00 | 37.35 | 29    |
| DES37.7 (1:4:2.14)      | [Ch][Cl]:PEG200:Eth                    | 0.140 | 0.560 | 0.300 | -     | 298.00 | 39.10 | 29    |
| DES37.8 (1:4:1.25)      | [Ch][Cl]:PEG200:Eth                    | 0.160 | 0.640 | 0.200 | -     | 298.00 | 42.07 | 29    |
| DES37.9 (1:4:0.56)      | [Ch][Cl]:PEG200:Eth                    | 0.180 | 0.720 | 0.100 | -     | 298.00 | 43.15 | 29    |
| DES38.1 (1:4:0.1:45.92) | [Ch][Cl]PEG200:FeCl <sub>3</sub> :Act  | 0.020 | 0.078 | 0.002 | 0.900 | 298.00 | 22.54 | 29    |
| DES38.2 (1:4:0.1:20.41) | [Ch][Cl]PEG200:FeCl <sub>3</sub> :Act  | 0.039 | 0.157 | 0.004 | 0.800 | 298.00 | 27.47 | 29    |
| DES38.3 (1:4:0.1:11.9)  | [Ch][Cl]PEG200:FeCl <sub>3</sub> :Act  | 0.059 | 0.235 | 0.006 | 0.700 | 298.00 | 32.52 | 29    |
| DES38.4 (1:4:0.1:7.65)  | [Ch][Cl]PEG200:FeCl <sub>3</sub> :Act  | 0.078 | 0.314 | 0.008 | 0.600 | 298.00 | 36.98 | 29    |
| DES38.5 (1:4:0.1:5.1)   | [Ch][Cl]PEG200:FeCl <sub>3</sub> :Act  | 0.098 | 0.392 | 0.010 | 0.500 | 298.00 | 37.11 | 29    |
| DES38.6 (1:4:0.1:3.4)   | [Ch][Cl]PEG200:FeCl <sub>3</sub> :Act  | 0.118 | 0.470 | 0.012 | 0.400 | 298.00 | 38.47 | 29    |
| DES38.7 (1:4:0.1:2.19)  | [Ch][Cl]PEG200:FeCl <sub>3</sub> :Act  | 0.137 | 0.549 | 0.014 | 0.300 | 298.00 | 39.97 | 29    |
| DES38.8 (1:4:0.1:1.28)  | [Ch][Cl]PEG200:FeCl <sub>3</sub> :Act  | 0.157 | 0.627 | 0.016 | 0.200 | 298.00 | 39.74 | 29    |
| DES38.9 (1:4:0.1:0.57)  | [Ch][Cl]PEG200:FeCl <sub>3</sub> :Act  | 0.176 | 0.706 | 0.018 | 0.100 | 298.00 | 38.58 | 29    |
| DES39.1 (1:4:0.1:45.92) | [Ch][Cl]PEG200:FeCl <sub>3</sub> :EtAc | 0.020 | 0.078 | 0.002 | 0.900 | 298.00 | 20.70 | 29    |
| DES39.2 (1:4:0.1:20.41) | [Ch][Cl]PEG200:FeCl <sub>3</sub> :EtAc | 0.039 | 0.157 | 0.004 | 0.800 | 298.00 | 21.05 | 29    |



|                         |                            |       |       |       |       |        |       |    |
|-------------------------|----------------------------|-------|-------|-------|-------|--------|-------|----|
| DES39.3 (1:4:0.1:11.9)  | [Ch][Cl]PEG200:FeCl3:EtAc  | 0.059 | 0.235 | 0.006 | 0.700 | 298.00 | 22.41 | 29 |
| DES39.4 (1:4:0.1:7.65)  | [Ch][Cl]PEG200:FeCl3:EtAc  | 0.078 | 0.314 | 0.008 | 0.600 | 298.00 | 25.85 | 29 |
| DES39.5 (1:4:0.1:5.1)   | [Ch][Cl]PEG200:FeCl3:EtAc  | 0.098 | 0.392 | 0.010 | 0.500 | 298.00 | 29.76 | 29 |
| DES39.6 (1:4:0.1:3.4)   | [Ch][Cl]PEG200:FeCl3:EtAc  | 0.118 | 0.470 | 0.012 | 0.400 | 298.00 | 32.97 | 29 |
| DES39.7 (1:4:0.1:2.19)  | [Ch][Cl]PEG200:FeCl3:EtAc  | 0.137 | 0.549 | 0.014 | 0.300 | 298.00 | 36.64 | 29 |
| DES39.8 (1:4:0.1:1.28)  | [Ch][Cl]PEG200:FeCl3:EtAc  | 0.157 | 0.627 | 0.016 | 0.200 | 298.00 | 38.47 | 29 |
| DES39.9 (1:4:0.1:0.57)  | [Ch][Cl]PEG200:FeCl3:EtAc  | 0.176 | 0.706 | 0.018 | 0.100 | 298.00 | 41.68 | 29 |
| DES40.1 (1:4:0.1:45.92) | [Ch][Cl]PEG200:FeCl3:Eth   | 0.020 | 0.078 | 0.002 | 0.900 | 298.00 | 21.15 | 29 |
| DES40.2 (1:4:0.1:20.41) | [Ch][Cl]PEG200:FeCl3:Eth   | 0.039 | 0.157 | 0.004 | 0.800 | 298.00 | 25.06 | 29 |
| DES40.3 (1:4:0.1:11.9)  | [Ch][Cl]PEG200:FeCl3:Eth   | 0.059 | 0.235 | 0.006 | 0.700 | 298.00 | 28.39 | 29 |
| DES40.4 (1:4:0.1:7.65)  | [Ch][Cl]PEG200:FeCl3:Eth   | 0.078 | 0.314 | 0.008 | 0.600 | 298.00 | 32.17 | 29 |
| DES40.5 (1:4:0.1:5.1)   | [Ch][Cl]PEG200:FeCl3:Eth   | 0.098 | 0.392 | 0.010 | 0.500 | 298.00 | 35.49 | 29 |
| DES40.6 (1:4:0.1:3.4)   | [Ch][Cl]PEG200:FeCl3:Eth   | 0.118 | 0.470 | 0.012 | 0.400 | 298.00 | 36.19 | 29 |
| DES40.7 (1:4:0.1:2.19)  | [Ch][Cl]PEG200:FeCl3:Eth   | 0.137 | 0.549 | 0.014 | 0.300 | 298.00 | 37.45 | 29 |
| DES40.8 (1:4:0.1:1.28)  | [Ch][Cl]PEG200:FeCl3:Eth   | 0.157 | 0.627 | 0.016 | 0.200 | 298.00 | 36.40 | 29 |
| DES40.9 (1:4:0.1:0.57)  | [Ch][Cl]PEG200:FeCl3:Eth   | 0.176 | 0.706 | 0.018 | 0.100 | 298.00 | 36.98 | 29 |
| DES41.1 (1:4:0.1:45.92) | [Ch][Cl]PEG200:FeCl3:H2O   | 0.020 | 0.078 | 0.002 | 0.900 | 298.00 | 49.84 | 29 |
| DES41.2 (1:4:0.1:20.41) | [Ch][Cl]PEG200:FeCl3:H2O   | 0.039 | 0.157 | 0.004 | 0.800 | 298.00 | 46.96 | 29 |
| DES41.3 (1:4:0.1:11.9)  | [Ch][Cl]PEG200:FeCl3:H2O   | 0.059 | 0.235 | 0.006 | 0.700 | 298.00 | 46.16 | 29 |
| DES41.4 (1:4:0.1:7.65)  | [Ch][Cl]PEG200:FeCl3:H2O   | 0.078 | 0.314 | 0.008 | 0.600 | 298.00 | 45.48 | 29 |
| DES41.5 (1:4:0.1:5.1)   | [Ch][Cl]PEG200:FeCl3:H2O   | 0.098 | 0.392 | 0.010 | 0.500 | 298.00 | 44.43 | 29 |
| DES41.6 (1:4:0.1:3.4)   | [Ch][Cl]PEG200:FeCl3:H2O   | 0.118 | 0.470 | 0.012 | 0.400 | 298.00 | 43.64 | 29 |
| DES41.7 (1:4:0.1:2.19)  | [Ch][Cl]PEG200:FeCl3:H2O   | 0.137 | 0.549 | 0.014 | 0.300 | 298.00 | 43.30 | 29 |
| DES41.8 (1:4:0.1:1.28)  | [Ch][Cl]PEG200:FeCl3:H2O   | 0.157 | 0.627 | 0.016 | 0.200 | 298.00 | 42.15 | 29 |
| DES41.9 (1:4:0.1:0.57)  | [Ch][Cl]PEG200:FeCl3:H2O   | 0.176 | 0.706 | 0.018 | 0.100 | 298.00 | 41.46 | 29 |
| DES42.1 (1:4:0.1:45.92) | [Ch][Cl]PEG200:FeCl3:IsoOH | 0.020 | 0.078 | 0.002 | 0.900 | 298.00 | 18.18 | 29 |
| DES42.2 (1:4:0.1:20.41) | [Ch][Cl]PEG200:FeCl3:IsoOH | 0.039 | 0.157 | 0.004 | 0.800 | 298.00 | 20.13 | 29 |
| DES42.3 (1:4:0.1:11.9)  | [Ch][Cl]PEG200:FeCl3:IsoOH | 0.059 | 0.235 | 0.006 | 0.700 | 298.00 | 22.41 | 29 |
| DES42.4 (1:4:0.1:7.65)  | [Ch][Cl]PEG200:FeCl3:IsoOH | 0.078 | 0.314 | 0.008 | 0.600 | 298.00 | 24.72 | 29 |
| DES42.5 (1:4:0.1:5.1)   | [Ch][Cl]PEG200:FeCl3:IsoOH | 0.098 | 0.392 | 0.010 | 0.500 | 298.00 | 27.92 | 29 |
| DES42.6 (1:4:0.1:3.4)   | [Ch][Cl]PEG200:FeCl3:IsoOH | 0.118 | 0.470 | 0.012 | 0.400 | 298.00 | 31.49 | 29 |
| DES42.7 (1:4:0.1:2.19)  | [Ch][Cl]PEG200:FeCl3:IsoOH | 0.137 | 0.549 | 0.014 | 0.300 | 298.00 | 34.69 | 29 |
| DES42.8 (1:4:0.1:1.28)  | [Ch][Cl]PEG200:FeCl3:IsoOH | 0.157 | 0.627 | 0.016 | 0.200 | 298.00 | 37.56 | 29 |
| DES42.9 (1:4:0.1:0.57)  | [Ch][Cl]PEG200:FeCl3:IsoOH | 0.176 | 0.706 | 0.018 | 0.100 | 298.00 | 40.31 | 29 |
| DES43 (1:4:0.1)         | [Ch][Cl]:PEG200:FeCl3      | 0.196 | 0.784 | 0.020 | -     | 298.00 | 34.46 | 29 |
| DES44.1 (1:4:45)        | [Ch][Cl]:PEG200:H2O        | 0.020 | 0.080 | 0.900 | -     | 298.00 | 47.32 | 29 |
| DES44.2 (1:4:20)        | [Ch][Cl]:PEG200:H2O        | 0.040 | 0.160 | 0.800 | -     | 298.00 | 49.21 | 29 |
| DES44.3 (1:4:11.67)     | [Ch][Cl]:PEG200:H2O        | 0.060 | 0.240 | 0.700 | -     | 298.00 | 48.66 | 29 |
| DES44.4 (1:4:7.5)       | [Ch][Cl]:PEG200:H2O        | 0.080 | 0.320 | 0.600 | -     | 298.00 | 47.98 | 29 |
| DES44.5 (1:4:5)         | [Ch][Cl]:PEG200:H2O        | 0.100 | 0.400 | 0.500 | -     | 298.00 | 46.92 | 29 |
| DES44.6 (1:4:3.33)      | [Ch][Cl]:PEG200:H2O        | 0.120 | 0.480 | 0.400 | -     | 298.00 | 46.37 | 29 |
| DES44.7 (1:4:2.14)      | [Ch][Cl]:PEG200:H2O        | 0.140 | 0.560 | 0.300 | -     | 298.00 | 45.83 | 29 |
| DES44.8 (1:4:1.25)      | [Ch][Cl]:PEG200:H2O        | 0.160 | 0.640 | 0.200 | -     | 298.00 | 46.37 | 29 |
| DES44.9 (1:4:0.56)      | [Ch][Cl]:PEG200:H2O        | 0.180 | 0.720 | 0.100 | -     | 298.00 | 46.51 | 29 |
| DES45.1 (1:4:45)        | [Ch][Cl]:PEG200:IsoOH      | 0.020 | 0.080 | 0.900 | -     | 298.00 | 19.19 | 29 |
| DES45.2 (1:4:20)        | [Ch][Cl]:PEG200:IsoOH      | 0.040 | 0.160 | 0.800 | -     | 298.00 | 20.67 | 29 |
| DES45.3 (1:4:11.67)     | [Ch][Cl]:PEG200:IsoOH      | 0.060 | 0.240 | 0.700 | -     | 298.00 | 23.09 | 29 |
| DES45.4 (1:4:7.5)       | [Ch][Cl]:PEG200:IsoOH      | 0.080 | 0.320 | 0.600 | -     | 298.00 | 25.11 | 29 |
| DES45.5 (1:4:5)         | [Ch][Cl]:PEG200:IsoOH      | 0.100 | 0.400 | 0.500 | -     | 298.00 | 28.60 | 29 |
| DES45.6 (1:4:3.33)      | [Ch][Cl]:PEG200:IsoOH      | 0.120 | 0.480 | 0.400 | -     | 298.00 | 31.44 | 29 |
| DES45.7 (1:4:2.14)      | [Ch][Cl]:PEG200:IsoOH      | 0.140 | 0.560 | 0.300 | -     | 298.00 | 33.45 | 29 |
| DES45.8 (1:4:1.25)      | [Ch][Cl]:PEG200:IsoOH      | 0.160 | 0.640 | 0.200 | -     | 298.00 | 36.42 | 29 |
| DES45.9 (1:4:0.56)      | [Ch][Cl]:PEG200:IsoOH      | 0.180 | 0.720 | 0.100 | -     | 298.00 | 40.05 | 29 |
| DES46.1 (1:7)           | [Ch][Cl]:PEG200            | 0.125 | 0.875 | -     | -     | 298.00 | 51.54 | 30 |
| DES46.2 (1:6)           | [Ch][Cl]:PEG200            | 0.143 | 0.857 | -     | -     | 298.00 | 52.26 | 30 |
| DES46.3 (1:5)           | [Ch][Cl]:PEG200            | 0.167 | 0.833 | -     | -     | 298.00 | 48.39 | 30 |
| DES46.4 (1:4)           | [Ch][Cl]:PEG200            | 0.200 | 0.800 | -     | -     | 298.00 | 55.03 | 30 |
| DES47 (1:4:0.1)         | [Ch][Cl]:PEG400:FeCl3      | 0.196 | 0.784 | 0.020 | -     | 298.00 | 35.59 | 29 |
| DES48 (1:4)             | [Ch][Cl]:PEG400            | 0.800 | 0.200 | -     | -     | 298.00 | 45.62 | 29 |
| DES49 (1:3.5)           | [Ch][Cl]:PenOH             | 0.200 | 0.800 | -     | -     | 298.15 | 47.50 | 26 |
| DES50 (1:2)             | [Ch][Cl]:Ph                | 0.333 | 0.667 | -     | -     | 298.15 | 35.46 | 21 |
| DES51 (1:2)             | [Ch][Cl]:TFA               | 0.333 | 0.667 | -     | -     | 313.15 | 35.90 | 1  |
| DES52.1 (1:2.32:14.25)  | [Ch][Cl]:U:H2O             | 0.057 | 0.132 | 0.811 | -     | 307.90 | 59.58 | 31 |
| DES52.2 (1:2.32:5.15)   | [Ch][Cl]:U:H2O             | 0.118 | 0.274 | 0.608 | -     | 307.90 | 64.31 | 31 |
| DES52.3 (1:2.32:1.74)   | [Ch][Cl]:U:H2O             | 0.197 | 0.459 | 0.343 | -     | 307.90 | 69.41 | 31 |
| DES52.4 (1:2.32:0.08)   | [Ch][Cl]:U:H2O             | 0.294 | 0.683 | 0.024 | -     | 307.90 | 74.43 | 31 |
| DES53 (1:2)             | [Ch][Cl]:U                 | 0.333 | 0.667 | -     | -     | 293.15 | 57.20 | 32 |
| DES54 (2.02:1:2.95)     | [Ch][Cl]:Xyl:H2O           | 0.338 | 0.168 | 0.494 | -     | 278.15 | 80.68 | 10 |
| DES55 (1:3)             | [DEEA][Cl]:DEG             | 0.250 | 0.750 | -     | -     | 293.00 | 64.95 | 5  |
| DES56 (1:2)             | [EA][Br]:Gly               | 0.333 | 0.667 | -     | -     | 298.15 | 57.60 | 4  |
| DES57 (1:1.5)           | [EA][Cl]:Ace               | 0.400 | 0.600 | -     | -     | 313.15 | 46.30 | 1  |
| DES58 (1:1.5)           | [EA][Cl]:TFA               | 0.400 | 0.600 | -     | -     | 313.15 | 30.10 | 1  |

|                  |                                                               |       |       |       |   |        |       |    |
|------------------|---------------------------------------------------------------|-------|-------|-------|---|--------|-------|----|
| DES59 (1:1.5)    | [EA][Cl]:U                                                    | 0.400 | 0.600 | -     | - | 313.15 | 52.90 | 1  |
| DES60.1 (1:6)    | [MPPyr][N(SO <sub>2</sub> CF <sub>3</sub> ) <sub>2</sub> ]:EG | 0.143 | 0.857 | -     | - | 298.15 | 38.40 | 14 |
| DES60.2 (1:4)    | [MPPyr][N(SO <sub>2</sub> CF <sub>3</sub> ) <sub>2</sub> ]:EG | 0.200 | 0.800 | -     | - | 298.15 | 38.40 | 14 |
| DES60.3 (1:2)    | [MPPyr][N(SO <sub>2</sub> CF <sub>3</sub> ) <sub>2</sub> ]:EG | 0.333 | 0.667 | -     | - | 298.15 | 38.00 | 14 |
| DES61 (1:4)      | [MTP][Br]:DEG                                                 | 0.200 | 0.800 | -     | - | 293.00 | 62.74 | 5  |
| DES62.1 (1:4)    | [MTP][Br]:EG                                                  | 0.200 | 0.800 | -     | - | 303.15 | 50.74 | 33 |
| DES62.2 (1:2)    | [MTP][Br]:EG                                                  | 0.333 | 0.667 | -     | - | 298.15 | 47.51 | 18 |
| DES63 (1:3)      | [MTP][Br]:Gly                                                 | 0.250 | 0.750 | -     | - | 298.15 | 59.35 | 18 |
| DES64.1 (1:16)   | [MTP][Br]:MDEA                                                | 0.059 | 0.941 | -     | - | 298.15 | 41.99 | 3  |
| DES64.2 (1:10)   | [MTP][Br]:MDEA                                                | 0.091 | 0.909 | -     | - | 298.15 | 42.80 | 3  |
| DES64.3 (1:7)    | [MTP][Br]:MDEA                                                | 0.125 | 0.875 | -     | - | 298.15 | 43.06 | 3  |
| DES65.1 (1:8)    | [MTP][Br]:MEA                                                 | 0.110 | 0.890 | -     | - | 298.15 | 50.30 | 24 |
| DES65.2 (1:7)    | [MTP][Br]:MEA                                                 | 0.130 | 0.870 | -     | - | 298.15 | 50.20 | 24 |
| DES65.3 (1:6)    | [MTP][Br]:MEA                                                 | 0.140 | 0.860 | -     | - | 298.15 | 49.30 | 24 |
| DES65.4 (1:5)    | [MTP][Br]:MEA                                                 | 0.160 | 0.840 | -     | - | 298.15 | 48.90 | 24 |
| DES66 (1:5.25)   | [MTP][Br]:TEG                                                 | 0.160 | 0.840 | -     | - | 303.15 | 49.27 | 33 |
| DES67.1 (1:3)    | [N-DEEA][Cl]:EG                                               | 0.250 | 0.750 | -     | - | 303.15 | 47.15 | 33 |
| DES67.2 (1:2)    | [N-DEEA][Cl]:EG                                               | 0.333 | 0.667 | -     | - | 298.15 | 51.29 | 18 |
| DES68.1 (1:4)    | [N-DEEA][Cl]:Gly                                              | 0.200 | 0.800 | -     | - | 303.15 | 58.75 | 18 |
| DES68.2 (1:2)    | [N-DEEA][Cl]:Gly                                              | 0.333 | 0.667 | -     | - | 298.15 | 58.94 | 18 |
| DES69 (1:2)      | [N-DEEA][Cl]:TFA                                              | 0.333 | 0.667 | -     | - | 303.15 | 39.78 | 33 |
| DES70 (1:2)      | [PA][Br]:Gly                                                  | 0.333 | 0.667 | -     | - | 298.15 | 51.70 | 4  |
| DES71 (1:1)      | [TBA][Br]:AA                                                  | 0.500 | 0.500 | -     | - | 298.15 | 34.50 | 34 |
| DES72 (1:2)      | [TBA][Br]:DEG                                                 | 0.333 | 0.667 | -     | - | 293.00 | 53.50 | 5  |
| DES73 (1:2)      | [TBA][Br]:EG                                                  | 0.333 | 0.667 | -     | - | 298.15 | 53.31 | 6  |
| DES74 (1:1)      | [TBA][Br]:FA                                                  | 0.500 | 0.500 | -     | - | 298.15 | 37.20 | 34 |
| DES75 (1:1)      | [TBA][Br]:MalA                                                | 0.500 | 0.500 | -     | - | 298.15 | 38.20 | 34 |
| DES76.1 (1:6)    | [TBA][Br]:MEA                                                 | 0.140 | 0.860 | -     | - | 298.15 | 36.10 | 24 |
| DES76.2 (1:5)    | [TBA][Br]:MEA                                                 | 0.160 | 0.840 | -     | - | 298.15 | 36.00 | 24 |
| DES76.3 (1:4)    | [TBA][Br]:MEA                                                 | 0.200 | 0.800 | -     | - | 298.15 | 35.80 | 24 |
| DES76.4 (1:3)    | [TBA][Br]:MEA                                                 | 0.250 | 0.750 | -     | - | 298.15 | 35.70 | 24 |
| DES77 (1:1)      | [TBA][Br]:OA                                                  | 0.500 | 0.500 | -     | - | 298.15 | 42.70 | 34 |
| DES78 (1:1)      | [TBA][Br]:PA                                                  | 0.500 | 0.500 | -     | - | 298.15 | 32.40 | 34 |
| DES79.1 (6:1)    | [TBA][Cl]:Arg                                                 | 0.857 | 0.143 | -     | - | 313.15 | 40.40 | 35 |
| DES79.2 (7:1)    | [TBA][Cl]:Arg                                                 | 0.875 | 0.125 | -     | - | 313.15 | 38.20 | 35 |
| DES79.3 (8:1)    | [TBA][Cl]:Arg                                                 | 0.889 | 0.111 | -     | - | 313.15 | 39.70 | 35 |
| DES80.1 (9:1)    | [TBA][Cl]:AspA                                                | 0.900 | 0.100 | -     | - | 313.15 | 38.50 | 35 |
| DES80.2 (10:1)   | [TBA][Cl]:AspA                                                | 0.909 | 0.091 | -     | - | 313.15 | 40.90 | 35 |
| DES80.3 (11:1)   | [TBA][Cl]:AspA                                                | 0.917 | 0.083 | -     | - | 313.15 | 43.40 | 35 |
| DES81.1 (8:1)    | [TBA][Cl]:GluA                                                | 0.889 | 0.111 | -     | - | 313.15 | 39.10 | 35 |
| DES81.2 (9:1)    | [TBA][Cl]:GluA                                                | 0.900 | 0.100 | -     | - | 313.15 | 33.60 | 35 |
| DES81.3 (10:1)   | [TBA][Cl]:GluA                                                | 0.909 | 0.091 | -     | - | 313.15 | 37.60 | 35 |
| DES82 (9:1)      | [TBA][Cl]:Met                                                 | 0.900 | 0.100 | -     | - | 313.15 | 41.80 | 35 |
| DES83 (1:1)      | [TBA][HSO <sub>4</sub> ]:BA                                   | 0.500 | 0.500 | -     | - | 333.15 | 42.60 | 8  |
| DES84 (1:1)      | [TBA][HSO <sub>4</sub> ]:DGA                                  | 0.500 | 0.500 | -     | - | 303.15 | 43.89 | 12 |
| DES85 (1:0.75)   | [TBA][HSO <sub>4</sub> ]:Nin                                  | 0.571 | 0.429 | -     | - | 308.15 | 43.23 | 25 |
| DES86 (1:1)      | [TEA][Br]:BA                                                  | 0.500 | 0.500 | -     | - | 333.15 | 52.59 | 8  |
| DES87.1 (1:5)    | [TPA][Br]:EG                                                  | 0.167 | 0.833 | -     | - | 303.15 | 46.99 | 36 |
| DES87.2 (1:4)    | [TPA][Br]:EG                                                  | 0.200 | 0.800 | -     | - | 303.15 | 46.80 | 36 |
| DES87.3 (1:3)    | [TPA][Br]:EG                                                  | 0.250 | 0.750 | -     | - | 303.15 | 46.27 | 36 |
| DES88.1 (1:4)    | [TPA][Br]:Gly                                                 | 0.200 | 0.800 | -     | - | 303.15 | 53.15 | 36 |
| DES88.2 (1:3)    | [TPA][Br]:Gly                                                 | 0.250 | 0.750 | -     | - | 303.15 | 52.77 | 36 |
| DES88.3 (1:2)    | [TPA][Br]:Gly                                                 | 0.333 | 0.667 | -     | - | 303.15 | 50.87 | 36 |
| DES89.1 (1:4)    | [TPA][Br]:TEG                                                 | 0.200 | 0.800 | -     | - | 303.15 | 45.96 | 36 |
| DES89.2 (1:3)    | [TPA][Br]:TEG                                                 | 0.250 | 0.750 | -     | - | 303.15 | 46.17 | 36 |
| DES89.3 (1:2.5)  | [TPA][Br]:TEG                                                 | 0.286 | 0.714 | -     | - | 303.15 | 46.55 | 36 |
| DES90 (1:2)      | Bet:LacA                                                      | 0.333 | 0.667 | -     | - | 293.15 | 46.30 | 37 |
| DES91 (1:1:6.5)  | Glu:CA                                                        | 0.118 | 0.118 | 0.765 | - | 288.15 | 71.30 | 16 |
| DES92.1 (3:7)    | Mat:Pae                                                       | 0.300 | 0.700 | -     | - | 303.15 | 42.14 | 38 |
| DES92.2 (4:6)    | Mat:Pae                                                       | 0.400 | 0.600 | -     | - | 303.15 | 43.15 | 38 |
| DES92.3 (5:5)    | Mat:Pae                                                       | 0.500 | 0.500 | -     | - | 303.15 | 43.36 | 38 |
| DES93 (7:3)      | Men:bor                                                       | 0.700 | 0.300 | -     | - | 298.15 | 29.04 | 39 |
| DES94 (3:2)      | Men:Cam                                                       | 0.600 | 0.400 | -     | - | 298.15 | 29.41 | 39 |
| DES95 (1:1)      | Men:CapA                                                      | 0.500 | 0.500 | -     | - | 298.15 | 28.04 | 40 |
| DES96.1 (3:1)    | Men:OcA                                                       | 0.750 | 0.250 | -     | - | 298.20 | 23.77 | 41 |
| DES96.2 (2:1)    | Men:OcA                                                       | 0.667 | 0.333 | -     | - | 298.24 | 20.94 | 41 |
| DES96.3 (1:1)    | Men:OcA                                                       | 0.500 | 0.500 | -     | - | 298.11 | 26.67 | 41 |
| DES96.4 (1:2)    | Men:OcA                                                       | 0.333 | 0.667 | -     | - | 298.00 | 25.72 | 41 |
| DES96.5 (1:3)    | Men:OcA                                                       | 0.250 | 0.750 | -     | - | 298.16 | 23.32 | 41 |
| DES97.1 (1:0.04) | PDA:1,4-ButOH                                                 | 0.959 | 0.042 | -     | - | 293.15 | 41.82 | 42 |
| DES97.2 (1:0.09) | PDA:1,4-ButOH                                                 | 0.916 | 0.084 | -     | - | 293.15 | 42.26 | 42 |
| DES97.3 (1:0.15) | PDA:1,4-ButOH                                                 | 0.873 | 0.127 | -     | - | 293.15 | 42.85 | 42 |

|                          |               |       |       |       |        |       |    |
|--------------------------|---------------|-------|-------|-------|--------|-------|----|
| DES97.4 (1:0.21)         | PDA:1,4-ButOH | 0.830 | 0.171 | -     | 293.15 | 43.13 | 42 |
| DES97.5 (1:0.27)         | PDA:1,4-ButOH | 0.785 | 0.215 | -     | 293.15 | 43.57 | 42 |
| DES97.6 (1:0.35)         | PDA:1,4-ButOH | 0.739 | 0.261 | -     | 293.15 | 44.12 | 42 |
| DES97.7 (1:0.44)         | PDA:1,4-ButOH | 0.693 | 0.307 | -     | 293.15 | 44.60 | 42 |
| DES97.8 (1:0.55)         | PDA:1,4-ButOH | 0.646 | 0.354 | -     | 293.15 | 45.26 | 42 |
| DES97.9 (1:0.67)         | PDA:1,4-ButOH | 0.598 | 0.402 | -     | 293.15 | 45.67 | 42 |
| DES97.10 (1:0.82)        | PDA:1,4-ButOH | 0.549 | 0.451 | -     | 293.15 | 46.02 | 42 |
| DES97.11 (1:1)           | PDA:1,4-ButOH | 0.499 | 0.501 | -     | 293.15 | 46.13 | 42 |
| DES97.12 (1:1.23)        | PDA:1,4-ButOH | 0.448 | 0.552 | -     | 293.15 | 46.47 | 42 |
| DES97.13 (1:1.53)        | PDA:1,4-ButOH | 0.396 | 0.604 | -     | 293.15 | 46.75 | 42 |
| DES97.14 (1:1.92)        | PDA:1,4-ButOH | 0.343 | 0.657 | -     | 293.15 | 46.79 | 42 |
| DES97.15 (1:2.47)        | PDA:1,4-ButOH | 0.288 | 0.712 | -     | 293.15 | 46.69 | 42 |
| DES97.16 (1:3.29)        | PDA:1,4-ButOH | 0.233 | 0.767 | -     | 293.15 | 46.48 | 42 |
| DES97.17 (1:4.65)        | PDA:1,4-ButOH | 0.177 | 0.823 | -     | 293.15 | 46.15 | 42 |
| DES97.18 (1:7.40)        | PDA:1,4-ButOH | 0.119 | 0.881 | -     | 293.15 | 45.86 | 42 |
| DES97.19 (1:15.67)       | PDA:1,4-ButOH | 0.060 | 0.940 | -     | 293.15 | 45.56 | 42 |
| DES98.1 (1:0.25:0.14)    | PEG200:LacA   | 0.720 | 0.180 | 0.100 | 298.00 | 43.41 | 29 |
| DES98.2 (1:0.25:0.31)    | PEG200:LacA   | 0.640 | 0.160 | 0.200 | 298.00 | 43.03 | 29 |
| DES98.3 (1:0.25:0.54)    | PEG200:LacA   | 0.560 | 0.140 | 0.300 | 298.00 | 43.41 | 29 |
| DES98.4 (1:0.25:0.83)    | PEG200:LacA   | 0.480 | 0.120 | 0.400 | 298.00 | 42.90 | 29 |
| DES98.5 (1:0.25:0.1.25)  | PEG200:LacA   | 0.400 | 0.100 | 0.500 | 298.00 | 42.36 | 29 |
| DES98.6 (1:0.25:1.88)    | PEG200:LacA   | 0.320 | 0.080 | 0.600 | 298.00 | 40.26 | 29 |
| DES98.7 (1:0.25:2.92)    | PEG200:LacA   | 0.240 | 0.060 | 0.700 | 298.00 | 33.19 | 29 |
| DES98.8 (1:0.25:5)       | PEG200:LacA   | 0.160 | 0.040 | 0.800 | 298.00 | 29.50 | 29 |
| DES98.9 (1:0.25:11.25)   | PEG200:LacA   | 0.080 | 0.020 | 0.900 | 298.00 | 23.73 | 29 |
| DES99.1 (1:0.25:0.14)    | PEG200:LacA   | 0.720 | 0.180 | 0.100 | 298.00 | 39.88 | 29 |
| DES99.2 (1:0.25:0.31)    | PEG200:LacA   | 0.640 | 0.160 | 0.200 | 298.00 | 35.54 | 29 |
| DES99.3 (1:0.25:0.54)    | PEG200:LacA   | 0.560 | 0.140 | 0.300 | 298.00 | 33.84 | 29 |
| DES99.4 (1:0.25:0.83)    | PEG200:LacA   | 0.480 | 0.120 | 0.400 | 298.00 | 30.55 | 29 |
| DES99.5 (1:0.25:0.1.25)  | PEG200:LacA   | 0.400 | 0.100 | 0.500 | 298.00 | 28.21 | 29 |
| DES99.6 (1:0.25:1.88)    | PEG200:LacA   | 0.320 | 0.080 | 0.600 | 298.00 | 25.05 | 29 |
| DES99.7 (1:0.25:2.92)    | PEG200:LacA   | 0.240 | 0.060 | 0.700 | 298.00 | 22.95 | 29 |
| DES99.8 (1:0.25:5)       | PEG200:LacA   | 0.160 | 0.040 | 0.800 | 298.00 | 21.39 | 29 |
| DES99.9 (1:0.25:11.25)   | PEG200:LacA   | 0.080 | 0.020 | 0.900 | 298.00 | 19.93 | 29 |
| DES100.1 (1:0.25:0.14)   | PEG200:LacA   | 0.720 | 0.180 | 0.100 | 298.00 | 42.11 | 29 |
| DES100.2 (1:0.25:0.31)   | PEG200:LacA   | 0.640 | 0.160 | 0.200 | 298.00 | 40.01 | 29 |
| DES100.3 (1:0.25:0.54)   | PEG200:LacA   | 0.560 | 0.140 | 0.300 | 298.00 | 37.37 | 29 |
| DES100.4 (1:0.25:0.83)   | PEG200:LacA   | 0.480 | 0.120 | 0.400 | 298.00 | 36.08 | 29 |
| DES100.5 (1:0.25:0.1.25) | PEG200:LacA   | 0.400 | 0.100 | 0.500 | 298.00 | 33.44 | 29 |
| DES100.6 (1:0.25:1.88)   | PEG200:LacA   | 0.320 | 0.080 | 0.600 | 298.00 | 30.44 | 29 |
| DES100.7 (1:0.25:2.92)   | PEG200:LacA   | 0.240 | 0.060 | 0.700 | 298.00 | 26.62 | 29 |
| DES100.8 (1:0.25:5)      | PEG200:LacA   | 0.160 | 0.040 | 0.800 | 298.00 | 23.87 | 29 |
| DES100.9 (1:0.25:11.25)  | PEG200:LacA   | 0.080 | 0.020 | 0.900 | 298.00 | 20.98 | 29 |
| DES101.1 (1:0.25:0.14)   | PEG200:LacA   | 0.720 | 0.180 | 0.100 | 298.00 | 44.46 | 29 |
| DES101.2 (1:0.25:0.31)   | PEG200:LacA   | 0.640 | 0.160 | 0.200 | 298.00 | 45.51 | 29 |
| DES101.3 (1:0.25:0.54)   | PEG200:LacA   | 0.560 | 0.140 | 0.300 | 298.00 | 45.65 | 29 |
| DES101.4 (1:0.25:0.83)   | PEG200:LacA   | 0.480 | 0.120 | 0.400 | 298.00 | 45.91 | 29 |
| DES101.5 (1:0.25:0.1.25) | PEG200:LacA   | 0.400 | 0.100 | 0.500 | 298.00 | 46.56 | 29 |
| DES101.6 (1:0.25:1.88)   | PEG200:LacA   | 0.320 | 0.080 | 0.600 | 298.00 | 46.96 | 29 |
| DES101.7 (1:0.25:2.92)   | PEG200:LacA   | 0.240 | 0.060 | 0.700 | 298.00 | 48.13 | 29 |
| DES101.8 (1:0.25:5)      | PEG200:LacA   | 0.160 | 0.040 | 0.800 | 298.00 | 48.40 | 29 |
| DES101.9 (1:0.25:11.25)  | PEG200:LacA   | 0.080 | 0.020 | 0.900 | 298.00 | 48.26 | 29 |
| DES102.1 (1:0.25:0.14)   | PEG200:LacA   | 0.720 | 0.180 | 0.100 | 298.00 | 39.61 | 29 |
| DES102.2 (1:0.25:0.31)   | PEG200:LacA   | 0.640 | 0.160 | 0.200 | 298.00 | 36.72 | 29 |
| DES102.3 (1:0.25:0.54)   | PEG200:LacA   | 0.560 | 0.140 | 0.300 | 298.00 | 33.71 | 29 |
| DES102.4 (1:0.25:0.83)   | PEG200:LacA   | 0.480 | 0.120 | 0.400 | 298.00 | 30.17 | 29 |
| DES102.5 (1:0.25:0.1.25) | PEG200:LacA   | 0.400 | 0.100 | 0.500 | 298.00 | 27.29 | 29 |
| DES102.6 (1:0.25:1.88)   | PEG200:LacA   | 0.320 | 0.080 | 0.600 | 298.00 | 25.05 | 29 |
| DES102.7 (1:0.25:2.92)   | PEG200:LacA   | 0.240 | 0.060 | 0.700 | 298.00 | 21.65 | 29 |
| DES102.8 (1:0.25:5)      | PEG200:LacA   | 0.160 | 0.040 | 0.800 | 298.00 | 20.20 | 29 |
| DES102.9 (1:0.25:11.25)  | PEG200:LacA   | 0.080 | 0.020 | 0.900 | 298.00 | 18.23 | 29 |
| DES103 (4:1)             | PEG200:LacA   | 0.800 | 0.200 | -     | 298.00 | 45.17 | 29 |
| DES104.1 (1:0.25:0.14)   | PEG200:NMA    | 0.720 | 0.180 | 0.100 | 298.00 | 40.95 | 29 |
| DES104.2 (1:0.25:0.31)   | PEG200:NMA    | 0.640 | 0.160 | 0.200 | 298.00 | 40.33 | 29 |
| DES104.3 (1:0.25:0.54)   | PEG200:NMA    | 0.560 | 0.140 | 0.300 | 298.00 | 38.48 | 29 |
| DES104.4 (1:0.25:0.83)   | PEG200:NMA    | 0.480 | 0.120 | 0.400 | 298.00 | 37.49 | 29 |
| DES104.5 (1:0.25:0.1.25) | PEG200:NMA    | 0.400 | 0.100 | 0.500 | 298.00 | 36.38 | 29 |
| DES104.6 (1:0.25:1.88)   | PEG200:NMA    | 0.320 | 0.080 | 0.600 | 298.00 | 33.76 | 29 |
| DES104.7 (1:0.25:2.92)   | PEG200:NMA    | 0.240 | 0.060 | 0.700 | 298.00 | 29.31 | 29 |
| DES104.8 (1:0.25:5)      | PEG200:NMA    | 0.160 | 0.040 | 0.800 | 298.00 | 24.49 | 29 |
| DES104.9 (1:0.25:11.25)  | PEG200:NMA    | 0.080 | 0.020 | 0.900 | 298.00 | 20.53 | 29 |
| DES104.10 (1:2:0.33)     | PEG200:NMA    | 0.300 | 0.600 | 0.100 | 298.00 | 38.13 | 29 |

|                          |            |       |       |       |        |       |    |
|--------------------------|------------|-------|-------|-------|--------|-------|----|
| DES104.11 (1:2:0.75)     | PEG200:NMA | 0.266 | 0.534 | 0.200 | 298.00 | 37.58 | 29 |
| DES104.12 (1:2:1.29)     | PEG200:NMA | 0.233 | 0.467 | 0.300 | 298.00 | 36.83 | 29 |
| DES104.13 (1:2:2)        | PEG200:NMA | 0.200 | 0.400 | 0.400 | 298.00 | 35.97 | 29 |
| DES104.14 (1:2:3)        | PEG200:NMA | 0.167 | 0.334 | 0.500 | 298.00 | 34.78 | 29 |
| DES104.15 (1:2:4.5)      | PEG200:NMA | 0.133 | 0.267 | 0.600 | 298.00 | 33.04 | 29 |
| DES104.16 (1:2:7)        | PEG200:NMA | 0.100 | 0.200 | 0.700 | 298.00 | 30.03 | 29 |
| DES104.17 (1:2:12)       | PEG200:NMA | 0.067 | 0.133 | 0.800 | 298.00 | 25.82 | 29 |
| DES104.18 (1:2:27)       | PEG200:NMA | 0.033 | 0.067 | 0.900 | 298.00 | 23.34 | 29 |
| DES105.1 (1:0.25:0.14)   | PEG200:NMA | 0.720 | 0.180 | 0.100 | 298.00 | 39.34 | 29 |
| DES105.2 (1:0.25:0.31)   | PEG200:NMA | 0.640 | 0.160 | 0.200 | 298.00 | 36.62 | 29 |
| DES105.3 (1:0.25:0.54)   | PEG200:NMA | 0.560 | 0.140 | 0.300 | 298.00 | 34.15 | 29 |
| DES105.4 (1:0.25:0.83)   | PEG200:NMA | 0.480 | 0.120 | 0.400 | 298.00 | 31.91 | 29 |
| DES105.5 (1:0.25:0.1.25) | PEG200:NMA | 0.400 | 0.100 | 0.500 | 298.00 | 29.06 | 29 |
| DES105.6 (1:0.25:1.88)   | PEG200:NMA | 0.320 | 0.080 | 0.600 | 298.00 | 26.22 | 29 |
| DES105.7 (1:0.25:2.92)   | PEG200:NMA | 0.240 | 0.060 | 0.700 | 298.00 | 23.50 | 29 |
| DES105.8 (1:0.25:5)      | PEG200:NMA | 0.160 | 0.040 | 0.800 | 298.00 | 21.27 | 29 |
| DES105.9 (1:0.25:11.25)  | PEG200:NMA | 0.080 | 0.020 | 0.900 | 298.00 | 19.66 | 29 |
| DES105.10 (1:2:0.33)     | PEG200:NMA | 0.300 | 0.600 | 0.100 | 298.00 | 37.04 | 29 |
| DES105.11 (1:2:0.75)     | PEG200:NMA | 0.266 | 0.534 | 0.200 | 298.00 | 34.78 | 29 |
| DES105.12 (1:2:1.29)     | PEG200:NMA | 0.233 | 0.467 | 0.300 | 298.00 | 32.08 | 29 |
| DES105.13 (1:2:2)        | PEG200:NMA | 0.200 | 0.400 | 0.400 | 298.00 | 29.60 | 29 |
| DES105.14 (1:2:3)        | PEG200:NMA | 0.167 | 0.334 | 0.500 | 298.00 | 27.01 | 29 |
| DES105.15 (1:2:4.5)      | PEG200:NMA | 0.133 | 0.267 | 0.600 | 298.00 | 24.74 | 29 |
| DES105.16 (1:2:7)        | PEG200:NMA | 0.100 | 0.200 | 0.700 | 298.00 | 23.12 | 29 |
| DES105.17 (1:2:12)       | PEG200:NMA | 0.067 | 0.133 | 0.800 | 298.00 | 21.50 | 29 |
| DES105.18 (1:2:27)       | PEG200:NMA | 0.033 | 0.067 | 0.900 | 298.00 | 20.74 | 29 |
| DES106.1 (1:0.25:0.14)   | PEG200:NMA | 0.720 | 0.180 | 0.100 | 298.00 | 40.09 | 29 |
| DES106.2 (1:0.25:0.31)   | PEG200:NMA | 0.640 | 0.160 | 0.200 | 298.00 | 37.61 | 29 |
| DES106.3 (1:0.25:0.54)   | PEG200:NMA | 0.560 | 0.140 | 0.300 | 298.00 | 35.76 | 29 |
| DES106.4 (1:0.25:0.83)   | PEG200:NMA | 0.480 | 0.120 | 0.400 | 298.00 | 33.90 | 29 |
| DES106.5 (1:0.25:0.1.25) | PEG200:NMA | 0.400 | 0.100 | 0.500 | 298.00 | 31.54 | 29 |
| DES106.6 (1:0.25:1.88)   | PEG200:NMA | 0.320 | 0.080 | 0.600 | 298.00 | 29.06 | 29 |
| DES106.7 (1:0.25:2.92)   | PEG200:NMA | 0.240 | 0.060 | 0.700 | 298.00 | 26.59 | 29 |
| DES106.8 (1:0.25:5)      | PEG200:NMA | 0.160 | 0.040 | 0.800 | 298.00 | 22.88 | 29 |
| DES106.9 (1:0.25:11.25)  | PEG200:NMA | 0.080 | 0.020 | 0.900 | 298.00 | 19.66 | 29 |
| DES106.10 (1:2:0.33)     | PEG200:NMA | 0.300 | 0.600 | 0.100 | 298.00 | 36.83 | 29 |
| DES106.11 (1:2:0.75)     | PEG200:NMA | 0.266 | 0.534 | 0.200 | 298.00 | 34.66 | 29 |
| DES106.12 (1:2:1.29)     | PEG200:NMA | 0.233 | 0.467 | 0.300 | 298.00 | 32.73 | 29 |
| DES106.13 (1:2:2)        | PEG200:NMA | 0.200 | 0.400 | 0.400 | 298.00 | 30.79 | 29 |
| DES106.14 (1:2:3)        | PEG200:NMA | 0.167 | 0.334 | 0.500 | 298.00 | 28.63 | 29 |
| DES106.15 (1:2:4.5)      | PEG200:NMA | 0.133 | 0.267 | 0.600 | 298.00 | 26.89 | 29 |
| DES106.16 (1:2:7)        | PEG200:NMA | 0.100 | 0.200 | 0.700 | 298.00 | 24.63 | 29 |
| DES106.17 (1:2:12)       | PEG200:NMA | 0.067 | 0.133 | 0.800 | 298.00 | 22.05 | 29 |
| DES106.18 (1:2:27)       | PEG200:NMA | 0.033 | 0.067 | 0.900 | 298.00 | 19.67 | 29 |
| DES107.1 (1:0.25:0.14)   | PEG200:NMA | 0.720 | 0.180 | 0.100 | 298.00 | 42.56 | 29 |
| DES107.2 (1:0.25:0.31)   | PEG200:NMA | 0.640 | 0.160 | 0.200 | 298.00 | 42.93 | 29 |
| DES107.3 (1:0.25:0.54)   | PEG200:NMA | 0.560 | 0.140 | 0.300 | 298.00 | 43.43 | 29 |
| DES107.4 (1:0.25:0.83)   | PEG200:NMA | 0.480 | 0.120 | 0.400 | 298.00 | 43.55 | 29 |
| DES107.5 (1:0.25:0.1.25) | PEG200:NMA | 0.400 | 0.100 | 0.500 | 298.00 | 43.92 | 29 |
| DES107.6 (1:0.25:1.88)   | PEG200:NMA | 0.320 | 0.080 | 0.600 | 298.00 | 44.54 | 29 |
| DES107.7 (1:0.25:2.92)   | PEG200:NMA | 0.240 | 0.060 | 0.700 | 298.00 | 45.03 | 29 |
| DES107.8 (1:0.25:5)      | PEG200:NMA | 0.160 | 0.040 | 0.800 | 298.00 | 46.27 | 29 |
| DES107.9 (1:0.25:11.25)  | PEG200:NMA | 0.080 | 0.020 | 0.900 | 298.00 | 45.16 | 29 |
| DES107.10 (1:2:0.33)     | PEG200:NMA | 0.300 | 0.600 | 0.100 | 298.00 | 39.85 | 29 |
| DES107.11 (1:2:0.75)     | PEG200:NMA | 0.266 | 0.534 | 0.200 | 298.00 | 40.82 | 29 |
| DES107.12 (1:2:1.29)     | PEG200:NMA | 0.233 | 0.467 | 0.300 | 298.00 | 41.47 | 29 |
| DES107.13 (1:2:2)        | PEG200:NMA | 0.200 | 0.400 | 0.400 | 298.00 | 42.56 | 29 |
| DES107.14 (1:2:3)        | PEG200:NMA | 0.167 | 0.334 | 0.500 | 298.00 | 43.42 | 29 |
| DES107.15 (1:2:4.5)      | PEG200:NMA | 0.133 | 0.267 | 0.600 | 298.00 | 44.05 | 29 |
| DES107.16 (1:2:7)        | PEG200:NMA | 0.100 | 0.200 | 0.700 | 298.00 | 45.24 | 29 |
| DES107.17 (1:2:12)       | PEG200:NMA | 0.067 | 0.133 | 0.800 | 298.00 | 47.19 | 29 |
| DES107.18 (1:2:27)       | PEG200:NMA | 0.033 | 0.067 | 0.900 | 298.00 | 47.40 | 29 |
| DES108.1 (1:0.25:0.14)   | PEG200:NMA | 0.720 | 0.180 | 0.100 | 298.00 | 38.60 | 29 |
| DES108.2 (1:0.25:0.31)   | PEG200:NMA | 0.640 | 0.160 | 0.200 | 298.00 | 34.89 | 29 |
| DES108.3 (1:0.25:0.54)   | PEG200:NMA | 0.560 | 0.140 | 0.300 | 298.00 | 32.53 | 29 |
| DES108.4 (1:0.25:0.83)   | PEG200:NMA | 0.480 | 0.120 | 0.400 | 298.00 | 29.81 | 29 |
| DES108.5 (1:0.25:0.1.25) | PEG200:NMA | 0.400 | 0.100 | 0.500 | 298.00 | 26.96 | 29 |
| DES108.6 (1:0.25:1.88)   | PEG200:NMA | 0.320 | 0.080 | 0.600 | 298.00 | 24.73 | 29 |
| DES108.7 (1:0.25:2.92)   | PEG200:NMA | 0.240 | 0.060 | 0.700 | 298.00 | 22.14 | 29 |
| DES108.8 (1:0.25:5)      | PEG200:NMA | 0.160 | 0.040 | 0.800 | 298.00 | 19.91 | 29 |
| DES108.9 (1:0.25:11.25)  | PEG200:NMA | 0.080 | 0.020 | 0.900 | 298.00 | 17.69 | 29 |
| DES108.10 (1:2:0.33)     | PEG200:NMA | 0.300 | 0.600 | 0.100 | 298.00 | 35.32 | 29 |

|                          |            |       |       |       |        |       |    |
|--------------------------|------------|-------|-------|-------|--------|-------|----|
| DES108.11 (1:2:0.75)     | PEG200:NMA | 0.266 | 0.534 | 0.200 | 298.00 | 32.41 | 29 |
| DES108.12 (1:2:1.29)     | PEG200:NMA | 0.233 | 0.467 | 0.300 | 298.00 | 29.60 | 29 |
| DES108.13 (1:2:2)        | PEG200:NMA | 0.200 | 0.400 | 0.400 | 298.00 | 26.79 | 29 |
| DES108.14 (1:2:3)        | PEG200:NMA | 0.167 | 0.334 | 0.500 | 298.00 | 24.41 | 29 |
| DES108.15 (1:2:4.5)      | PEG200:NMA | 0.133 | 0.267 | 0.600 | 298.00 | 22.58 | 29 |
| DES108.16 (1:2:7)        | PEG200:NMA | 0.100 | 0.200 | 0.700 | 298.00 | 21.07 | 29 |
| DES108.17 (1:2:12)       | PEG200:NMA | 0.067 | 0.133 | 0.800 | 298.00 | 19.24 | 29 |
| DES108.18 (1:2:27)       | PEG200:NMA | 0.033 | 0.067 | 0.900 | 298.00 | 17.62 | 29 |
| DES109.1 (1:2)           | PEG200:NMA | 0.333 | 0.667 | -     | 298.00 | 40.64 | 29 |
| DES109.2 (4:1)           | PEG200:NMA | 0.800 | 0.200 | -     | 298.00 | 44.17 | 29 |
| DES110.1 (1:0.25:0.14)   | PEG200:ThU | 0.720 | 0.180 | 0.100 | 298.00 | 44.16 | 29 |
| DES110.2 (1:0.25:0.31)   | PEG200:ThU | 0.640 | 0.160 | 0.200 | 298.00 | 42.78 | 29 |
| DES110.3 (1:0.25:0.54)   | PEG200:ThU | 0.560 | 0.140 | 0.300 | 298.00 | 40.77 | 29 |
| DES110.4 (1:0.25:0.83)   | PEG200:ThU | 0.480 | 0.120 | 0.400 | 298.00 | 38.88 | 29 |
| DES110.5 (1:0.25:0.1.25) | PEG200:ThU | 0.400 | 0.100 | 0.500 | 298.00 | 36.48 | 29 |
| DES110.6 (1:0.25:1.88)   | PEG200:ThU | 0.320 | 0.080 | 0.600 | 298.00 | 35.10 | 29 |
| DES110.7 (1:0.25:2.92)   | PEG200:ThU | 0.240 | 0.060 | 0.700 | 298.00 | 30.80 | 29 |
| DES110.8 (1:0.25:5)      | PEG200:ThU | 0.160 | 0.040 | 0.800 | 298.00 | 25.50 | 29 |
| DES110.9 (1:0.25:11.25)  | PEG200:ThU | 0.080 | 0.020 | 0.900 | 298.00 | 22.22 | 29 |
| DES111.1 (1:0.25:0.14)   | PEG200:ThU | 0.720 | 0.180 | 0.100 | 298.00 | 40.52 | 29 |
| DES111.2 (1:0.25:0.31)   | PEG200:ThU | 0.640 | 0.160 | 0.200 | 298.00 | 35.60 | 29 |
| DES111.3 (1:0.25:0.54)   | PEG200:ThU | 0.560 | 0.140 | 0.300 | 298.00 | 31.94 | 29 |
| DES111.4 (1:0.25:0.83)   | PEG200:ThU | 0.480 | 0.120 | 0.400 | 298.00 | 26.63 | 29 |
| DES111.5 (1:0.25:0.1.25) | PEG200:ThU | 0.400 | 0.100 | 0.500 | 298.00 | 27.39 | 29 |
| DES111.6 (1:0.25:1.88)   | PEG200:ThU | 0.320 | 0.080 | 0.600 | 298.00 | 24.11 | 29 |
| DES111.7 (1:0.25:2.92)   | PEG200:ThU | 0.240 | 0.060 | 0.700 | 298.00 | 22.59 | 29 |
| DES111.8 (1:0.25:5)      | PEG200:ThU | 0.160 | 0.040 | 0.800 | 298.00 | 21.21 | 29 |
| DES111.9 (1:0.25:11.25)  | PEG200:ThU | 0.080 | 0.020 | 0.900 | 298.00 | 20.33 | 29 |
| DES112.1 (1:0.25:0.14)   | PEG200:ThU | 0.720 | 0.180 | 0.100 | 298.00 | 41.65 | 29 |
| DES112.2 (1:0.25:0.31)   | PEG200:ThU | 0.640 | 0.160 | 0.200 | 298.00 | 40.89 | 29 |
| DES112.3 (1:0.25:0.54)   | PEG200:ThU | 0.560 | 0.140 | 0.300 | 298.00 | 39.64 | 29 |
| DES112.4 (1:0.25:0.83)   | PEG200:ThU | 0.480 | 0.120 | 0.400 | 298.00 | 37.10 | 29 |
| DES112.5 (1:0.25:0.1.25) | PEG200:ThU | 0.400 | 0.100 | 0.500 | 298.00 | 34.84 | 29 |
| DES112.6 (1:0.25:1.88)   | PEG200:ThU | 0.320 | 0.080 | 0.600 | 298.00 | 31.43 | 29 |
| DES112.7 (1:0.25:2.92)   | PEG200:ThU | 0.240 | 0.060 | 0.700 | 298.00 | 27.14 | 29 |
| DES112.8 (1:0.25:5)      | PEG200:ThU | 0.160 | 0.040 | 0.800 | 298.00 | 24.00 | 29 |
| DES112.9 (1:0.25:11.25)  | PEG200:ThU | 0.080 | 0.020 | 0.900 | 298.00 | 21.21 | 29 |
| DES113.1 (1:0.25:0.14)   | PEG200:ThU | 0.720 | 0.180 | 0.100 | 298.00 | 45.06 | 29 |
| DES113.2 (1:0.25:0.31)   | PEG200:ThU | 0.640 | 0.160 | 0.200 | 298.00 | 45.32 | 29 |
| DES113.3 (1:0.25:0.54)   | PEG200:ThU | 0.560 | 0.140 | 0.300 | 298.00 | 45.69 | 29 |
| DES113.4 (1:0.25:0.83)   | PEG200:ThU | 0.480 | 0.120 | 0.400 | 298.00 | 45.94 | 29 |
| DES113.5 (1:0.25:0.1.25) | PEG200:ThU | 0.400 | 0.100 | 0.500 | 298.00 | 46.31 | 29 |
| DES113.6 (1:0.25:1.88)   | PEG200:ThU | 0.320 | 0.080 | 0.600 | 298.00 | 46.70 | 29 |
| DES113.7 (1:0.25:2.92)   | PEG200:ThU | 0.240 | 0.060 | 0.700 | 298.00 | 47.44 | 29 |
| DES113.8 (1:0.25:5)      | PEG200:ThU | 0.160 | 0.040 | 0.800 | 298.00 | 48.85 | 29 |
| DES113.9 (1:0.25:11.25)  | PEG200:ThU | 0.080 | 0.020 | 0.900 | 298.00 | 49.98 | 29 |
| DES114.1 (1:0.25:0.14)   | PEG200:ThU | 0.720 | 0.180 | 0.100 | 298.00 | 39.64 | 29 |
| DES114.2 (1:0.25:0.31)   | PEG200:ThU | 0.640 | 0.160 | 0.200 | 298.00 | 36.60 | 29 |
| DES114.3 (1:0.25:0.54)   | PEG200:ThU | 0.560 | 0.140 | 0.300 | 298.00 | 34.20 | 29 |
| DES114.4 (1:0.25:0.83)   | PEG200:ThU | 0.480 | 0.120 | 0.400 | 298.00 | 30.80 | 29 |
| DES114.5 (1:0.25:0.1.25) | PEG200:ThU | 0.400 | 0.100 | 0.500 | 298.00 | 28.15 | 29 |
| DES114.6 (1:0.25:1.88)   | PEG200:ThU | 0.320 | 0.080 | 0.600 | 298.00 | 25.38 | 29 |
| DES114.7 (1:0.25:2.92)   | PEG200:ThU | 0.240 | 0.060 | 0.700 | 298.00 | 22.85 | 29 |
| DES114.8 (1:0.25:5)      | PEG200:ThU | 0.160 | 0.040 | 0.800 | 298.00 | 20.21 | 29 |
| DES114.9 (1:0.25:11.25)  | PEG200:ThU | 0.080 | 0.020 | 0.900 | 298.00 | 18.81 | 29 |
| DES115 (4:1)             | PEG200:ThU | 0.800 | 0.200 |       | 298.00 | 45.08 | 29 |
| DES116.1 (1:0.25:0.14)   | PEG400:ThU | 0.720 | 0.180 | 0.100 | 298.00 | 44.04 | 29 |
| DES116.2 (1:0.25:0.31)   | PEG400:ThU | 0.640 | 0.160 | 0.200 | 298.00 | 43.56 | 29 |
| DES116.3 (1:0.25:0.54)   | PEG400:ThU | 0.560 | 0.140 | 0.300 | 298.00 | 43.31 | 29 |
| DES116.4 (1:0.25:0.83)   | PEG400:ThU | 0.480 | 0.120 | 0.400 | 298.00 | 42.12 | 29 |
| DES116.5 (1:0.25:0.1.25) | PEG400:ThU | 0.400 | 0.100 | 0.500 | 298.00 | 39.74 | 29 |
| DES116.6 (1:0.25:1.88)   | PEG400:ThU | 0.320 | 0.080 | 0.600 | 298.00 | 37.47 | 29 |
| DES116.7 (1:0.25:2.92)   | PEG400:ThU | 0.240 | 0.060 | 0.700 | 298.00 | 34.72 | 29 |
| DES116.8 (1:0.25:5)      | PEG400:ThU | 0.160 | 0.040 | 0.800 | 298.00 | 29.10 | 29 |
| DES116.9 (1:0.25:11.25)  | PEG400:ThU | 0.080 | 0.020 | 0.900 | 298.00 | 23.02 | 29 |
| DES117.1 (1:0.25:0.14)   | PEG400:ThU | 0.720 | 0.180 | 0.100 | 298.00 | 42.84 | 29 |
| DES117.2 (1:0.25:0.31)   | PEG400:ThU | 0.640 | 0.160 | 0.200 | 298.00 | 40.57 | 29 |
| DES117.3 (1:0.25:0.54)   | PEG400:ThU | 0.560 | 0.140 | 0.300 | 298.00 | 37.94 | 29 |
| DES117.4 (1:0.25:0.83)   | PEG400:ThU | 0.480 | 0.120 | 0.400 | 298.00 | 33.77 | 29 |
| DES117.5 (1:0.25:0.1.25) | PEG400:ThU | 0.400 | 0.100 | 0.500 | 298.00 | 33.65 | 29 |
| DES117.6 (1:0.25:1.88)   | PEG400:ThU | 0.320 | 0.080 | 0.600 | 298.00 | 32.22 | 29 |
| DES117.7 (1:0.25:2.92)   | PEG400:ThU | 0.240 | 0.060 | 0.700 | 298.00 | 27.67 | 29 |



|                          |                          |       |       |       |        |       |    |
|--------------------------|--------------------------|-------|-------|-------|--------|-------|----|
| DES117.8 (1:0.25:5)      | PEG400:ThU               | 0.160 | 0.040 | 0.800 | 298.00 | 22.90 | 29 |
| DES117.9 (1:0.25:11.25)  | PEG400:ThU               | 0.080 | 0.020 | 0.900 | 298.00 | 21.46 | 29 |
| DES118.1 (1:0.25:0.14)   | PEG400:ThU               | 0.720 | 0.180 | 0.100 | 298.00 | 43.68 | 29 |
| DES118.2 (1:0.25:0.31)   | PEG400:ThU               | 0.640 | 0.160 | 0.200 | 298.00 | 42.72 | 29 |
| DES118.3 (1:0.25:0.54)   | PEG400:ThU               | 0.560 | 0.140 | 0.300 | 298.00 | 40.09 | 29 |
| DES118.4 (1:0.25:0.83)   | PEG400:ThU               | 0.480 | 0.120 | 0.400 | 298.00 | 39.26 | 29 |
| DES118.5 (1:0.25:0.1.25) | PEG400:ThU               | 0.400 | 0.100 | 0.500 | 298.00 | 36.04 | 29 |
| DES118.6 (1:0.25:1.88)   | PEG400:ThU               | 0.320 | 0.080 | 0.600 | 298.00 | 31.97 | 29 |
| DES118.7 (1:0.25:2.92)   | PEG400:ThU               | 0.240 | 0.060 | 0.700 | 298.00 | 27.80 | 29 |
| DES118.8 (1:0.25:5)      | PEG400:ThU               | 0.160 | 0.040 | 0.800 | 298.00 | 23.98 | 29 |
| DES118.9 (1:0.25:11.25)  | PEG400:ThU               | 0.080 | 0.020 | 0.900 | 298.00 | 19.43 | 29 |
| DES119.1 (1:0.25:0.14)   | PEG400:ThU               | 0.720 | 0.180 | 0.100 | 298.00 | 41.29 | 29 |
| DES119.2 (1:0.25:0.31)   | PEG400:ThU               | 0.640 | 0.160 | 0.200 | 298.00 | 41.76 | 29 |
| DES119.3 (1:0.25:0.54)   | PEG400:ThU               | 0.560 | 0.140 | 0.300 | 298.00 | 41.89 | 29 |
| DES119.4 (1:0.25:0.83)   | PEG400:ThU               | 0.480 | 0.120 | 0.400 | 298.00 | 42.12 | 29 |
| DES119.5 (1:0.25:0.1.25) | PEG400:ThU               | 0.400 | 0.100 | 0.500 | 298.00 | 41.64 | 29 |
| DES119.6 (1:0.25:1.88)   | PEG400:ThU               | 0.320 | 0.080 | 0.600 | 298.00 | 40.69 | 29 |
| DES119.7 (1:0.25:2.92)   | PEG400:ThU               | 0.240 | 0.060 | 0.700 | 298.00 | 39.14 | 29 |
| DES119.8 (1:0.25:5)      | PEG400:ThU               | 0.160 | 0.040 | 0.800 | 298.00 | 38.89 | 29 |
| DES119.9 (1:0.25:11.25)  | PEG400:ThU               | 0.080 | 0.020 | 0.900 | 298.00 | 36.15 | 29 |
| DES120.1 (1:0.25:0.14)   | PEG400:ThU               | 0.720 | 0.180 | 0.100 | 298.00 | 42.12 | 29 |
| DES120.2 (1:0.25:0.31)   | PEG400:ThU               | 0.640 | 0.160 | 0.200 | 298.00 | 38.89 | 29 |
| DES120.3 (1:0.25:0.54)   | PEG400:ThU               | 0.560 | 0.140 | 0.300 | 298.00 | 35.79 | 29 |
| DES120.4 (1:0.25:0.83)   | PEG400:ThU               | 0.480 | 0.120 | 0.400 | 298.00 | 34.12 | 29 |
| DES120.5 (1:0.25:0.1.25) | PEG400:ThU               | 0.400 | 0.100 | 0.500 | 298.00 | 31.25 | 29 |
| DES120.6 (1:0.25:1.88)   | PEG400:ThU               | 0.320 | 0.080 | 0.600 | 298.00 | 28.50 | 29 |
| DES120.7 (1:0.25:2.92)   | PEG400:ThU               | 0.240 | 0.060 | 0.700 | 298.00 | 24.57 | 29 |
| DES120.8 (1:0.25:5)      | PEG400:ThU               | 0.160 | 0.040 | 0.800 | 298.00 | 19.78 | 29 |
| DES120.9 (1:0.25:11.25)  | PEG400:ThU               | 0.080 | 0.020 | 0.900 | 298.00 | 18.13 | 29 |
| DES121 (4:1)             | PEG400:ThU               | 0.800 | 0.200 | -     | 298.00 | 42.22 | 29 |
| DES122 (7:3)             | Thy:bor                  | 0.700 | 0.300 | -     | 298.15 | 31.75 | 39 |
| DES123 (1:2)             | Thy:CaA                  | 0.333 | 0.667 | -     | 298.15 | 28.43 | 40 |
| DES124 (1:1)             | Thy:Cam                  | 0.500 | 0.500 | -     | 298.15 | 30.35 | 39 |
| DES125 (1:1)             | Thy:CapA                 | 0.500 | 0.500 | -     | 298.15 | 29.09 | 40 |
| DES126 (2:1)             | TMG:FuA                  | 0.667 | 0.333 | -     | 298.15 | 32.30 | 43 |
| DES127 (2:1)             | TMG:GlyA                 | 0.667 | 0.333 | -     | 298.15 | 55.92 | 43 |
| DES128 (1:1)             | TMG:ManA                 | 0.500 | 0.500 | -     | 298.15 | 64.50 | 43 |
| DES129 (2:1)             | TMG:PAA                  | 0.667 | 0.333 | -     | 298.15 | 40.74 | 43 |
| DES130 (1:4)             | ZnCl <sub>2</sub> :Ace   | 0.200 | 0.800 | -     | 293.02 | 53.00 | 44 |
| DES131 (1:4)             | ZnCl <sub>2</sub> :EG    | 0.200 | 0.800 | -     | 293.02 | 57.90 | 44 |
| DES132 (1:3)             | ZnCl <sub>2</sub> :HexOH | 0.250 | 0.750 | -     | 297.02 | 49.44 | 44 |
| DES133 (1:3.5)           | ZnCl <sub>2</sub> :U     | 0.222 | 0.778 | -     | 296.01 | 73.12 | 44 |

**Table S.3.** The calculated molecular descriptors for all the 81 modeled anions, cations and HBDs.

| Nb#               |                                                     | Hydrogen Bond Donor Region |                |                | Non-Polar Region |                | Hydrogen Bond Acceptor Region |                |                |
|-------------------|-----------------------------------------------------|----------------------------|----------------|----------------|------------------|----------------|-------------------------------|----------------|----------------|
|                   |                                                     | S <sub>1</sub>             | S <sub>2</sub> | S <sub>3</sub> | S <sub>4</sub>   | S <sub>5</sub> | S <sub>6</sub>                | S <sub>7</sub> | S <sub>8</sub> |
| <b>1- Anions</b>  |                                                     |                            |                |                |                  |                |                               |                |                |
| 1                 | [Br]                                                | 0.00000000                 | 0.00000000     | 0.00000000     | 0.00000000       | 0.00000000     | 0.00000000                    | 0.00000000     | 0.00000000     |
| 2                 | [Cl]                                                | 0.00000000                 | 0.00000000     | 0.00000000     | 0.00000000       | 0.00000000     | 0.00691650                    | 0.03055050     | 0.00000000     |
| 3                 | [HSO <sub>4</sub> ]                                 | 0.00000000                 | 0.00000000     | 0.00000000     | 0.00000000       | 0.00000000     | 0.00000000                    | 0.05238600     | 0.00000000     |
| 4                 | [N(SO <sub>2</sub> CF <sub>3</sub> ) <sub>2</sub> ] | 0.00000000                 | 0.00497450     | 0.00288100     | 0.00183750       | 0.00978200     | 0.05967450                    | 0.00430050     | 0.00000000     |
| <b>2- Cations</b> |                                                     |                            |                |                |                  |                |                               |                |                |
| 1                 | [AcCh]                                              | 0.00000000                 | 0.00001700     | 0.08060350     | 0.07213100       | 0.01110750     | 0.01546600                    | 0.00000700     | 0.00000000     |
| 2                 | [ATPP]                                              | 0.00000000                 | 0.00000000     | 0.05247250     | 0.13133000       | 0.08616300     | 0.00001250                    | 0.00000000     | 0.00000000     |
| 3                 | [BA]                                                | 0.00004150                 | 0.03163850     | 0.01343950     | 0.06252700       | 0.01411350     | 0.00000000                    | 0.00000000     | 0.00000000     |
| 4                 | [BTP]                                               | 0.00000000                 | 0.00007250     | 0.05136100     | 0.14494050       | 0.10567150     | 0.00000000                    | 0.00000000     | 0.00000000     |
| 5                 | [Ch]                                                | 0.00000000                 | 0.00442100     | 0.07271500     | 0.04591050       | 0.00417800     | 0.00832700                    | 0.00097450     | 0.00000000     |
| 6                 | [DEEA]                                              | 0.00000000                 | 0.00447600     | 0.06750900     | 0.06144650       | 0.00574550     | 0.00769800                    | 0.00125400     | 0.00000000     |
| 7                 | [EA]                                                | 0.00000000                 | 0.03230600     | 0.01505150     | 0.03407450       | 0.00184900     | 0.00000000                    | 0.00000000     | 0.00000000     |
| 8                 | [MPPyr]                                             | 0.00000000                 | 0.00000000     | 0.04628000     | 0.10644900       | 0.00785200     | 0.00000000                    | 0.00000000     | 0.00000000     |
| 9                 | [MTP]                                               | 0.00000000                 | 0.00000000     | 0.05564900     | 0.12074750       | 0.08008000     | 0.00000000                    | 0.00000000     | 0.00000000     |
| 10                | [N-DEEA]                                            | 0.00000000                 | 0.00595650     | 0.05116750     | 0.07803400       | 0.00676200     | 0.00487600                    | 0.00027300     | 0.00000000     |
| 11                | [PA]                                                | 0.00001600                 | 0.03197850     | 0.01330000     | 0.05022750       | 0.00812900     | 0.00000000                    | 0.00000000     | 0.00000000     |
| 12                | [TBA]                                               | 0.00000000                 | 0.00000000     | 0.03069200     | 0.22411450       | 0.05317700     | 0.00000000                    | 0.00000000     | 0.00000000     |
| 13                | [TEA]                                               | 0.00000000                 | 0.00000000     | 0.04154200     | 0.11301800       | 0.00348300     | 0.00000000                    | 0.00000000     | 0.00000000     |
| 14                | [TPA]                                               | 0.00000000                 | 0.00000000     | 0.03166450     | 0.17386550       | 0.02863850     | 0.00000000                    | 0.00000000     | 0.00000000     |
| <b>3- Others</b>  |                                                     |                            |                |                |                  |                |                               |                |                |
| 1                 | [1,2-ButOH]                                         | 0.00000000                 | 0.00303550     | 0.00916500     | 0.06406300       | 0.02658500     | 0.01265400                    | 0.00480300     | 0.00000000     |
| 2                 | [1,3-ButOH]                                         | 0.00000000                 | 0.00434700     | 0.01018350     | 0.06322650       | 0.02326400     | 0.01325800                    | 0.00768800     | 0.00000000     |
| 3                 | [1,4-ButOH]                                         | 0.00000000                 | 0.00466450     | 0.01031750     | 0.07009950       | 0.01834900     | 0.01325900                    | 0.00849900     | 0.00000000     |
| 4                 | [2,3-ButOH]                                         | 0.00000000                 | 0.00218500     | 0.00849900     | 0.06345400       | 0.02731650     | 0.01318650                    | 0.00438550     | 0.00000000     |
| 5                 | [AA]                                                | 0.00000000                 | 0.00573350     | 0.00631250     | 0.03722650       | 0.01138200     | 0.02125000                    | 0.00004900     | 0.00000000     |
| 6                 | [Ace]                                               | 0.00000000                 | 0.00219350     | 0.01399900     | 0.03305950       | 0.01434900     | 0.01224800                    | 0.00532150     | 0.00000000     |
| 7                 | [Act]                                               | 0.00000000                 | 0.00000000     | 0.00204450     | 0.05802250       | 0.00992150     | 0.01598800                    | 0.00068250     | 0.00000000     |
| 8                 | [Arg]                                               | 0.00000000                 | 0.00665500     | 0.04011050     | 0.06521250       | 0.03955900     | 0.03255250                    | 0.01025600     | 0.00013300     |
| 9                 | [AspA]                                              | 0.00000000                 | 0.01198800     | 0.02472500     | 0.03717700       | 0.02402700     | 0.03803850                    | 0.00267000     | 0.00024550     |
| 10                | [BenA]                                              | 0.00000000                 | 0.00708450     | 0.01094800     | 0.08571200       | 0.09762100     | 0.01809950                    | 0.00018350     | 0.00000000     |
| 11                | [Bet]                                               | 0.00000000                 | 0.00000000     | 0.04135150     | 0.05329000       | 0.00523650     | 0.01089150                    | 0.02330800     | 0.00000450     |
| 12                | [bor]                                               | 0.00000000                 | 0.00146400     | 0.00480200     | 0.09652450       | 0.05844350     | 0.00619950                    | 0.00314100     | 0.00000000     |
| 13                | [CA]                                                | 0.00000000                 | 0.01948150     | 0.02331900     | 0.03998750       | 0.03897150     | 0.05231150                    | 0.00001700     | 0.00000000     |
| 14                | [CaA]                                               | 0.00000000                 | 0.00563100     | 0.00430450     | 0.13152950       | 0.06020650     | 0.02034150                    | 0.00004150     | 0.00000000     |
| 15                | [Cam]                                               | 0.00000000                 | 0.00000000     | 0.00039250     | 0.10985400       | 0.04105700     | 0.10985400                    | 0.00039250     | 0.00000000     |
| 16                | [CapA]                                              | 0.00000000                 | 0.00563400     | 0.00432650     | 0.10955700       | 0.04834700     | 0.02034000                    | 0.00004350     | 0.00000000     |
| 17                | [DEG]                                               | 0.00000000                 | 0.00576000     | 0.01022750     | 0.07387350       | 0.01817300     | 0.02183650                    | 0.00624250     | 0.00000000     |
| 18                | [DGA]                                               | 0.00000000                 | 0.01233750     | 0.02213950     | 0.03693450       | 0.02471800     | 0.03864750                    | 0.00291750     | 0.00000000     |
| 19                | [EG]                                                | 0.00000000                 | 0.00324450     | 0.00986850     | 0.04247900       | 0.01138950     | 0.01318650                    | 0.00613900     | 0.00000000     |
| 20                | [EtAc]                                              | 0.00000000                 | 0.00000000     | 0.00178300     | 0.07926600       | 0.01734500     | 0.01980800                    | 0.00012750     | 0.00000000     |
| 21                | [Eth]                                               | 0.00000000                 | 0.00197050     | 0.00547550     | 0.04400100       | 0.01702600     | 0.00632950                    | 0.00466250     | 0.00000000     |
| 22                | [FA]                                                | 0.00000000                 | 0.00641000     | 0.01038900     | 0.01804750       | 0.01167650     | 0.02038250                    | 0.00000000     | 0.00000000     |
| 23                | [FeCl <sub>3</sub> ]                                | 0.00000000                 | 0.00000000     | 0.00775950     | 0.03350050       | 0.06601450     | 0.00000000                    | 0.00000000     | 0.00000000     |
| 24                | [Fru]                                               | 0.00000000                 | 0.00789450     | 0.02352850     | 0.06002150       | 0.02484350     | 0.03676800                    | 0.00499800     | 0.00000000     |
| 25                | [FuA]                                               | 0.00000000                 | 0.00594700     | 0.01792600     | 0.03813800       | 0.03696150     | 0.02229100                    | 0.00001200     | 0.00000000     |
| 26                | [Glu]                                               | 0.00000000                 | 0.01317100     | 0.02945200     | 0.04628450       | 0.02320950     | 0.04083800                    | 0.00697050     | 0.00000000     |
| 27                | [GluA]                                              | 0.00000000                 | 0.01160700     | 0.01986250     | 0.05795400       | 0.02512450     | 0.03977300                    | 0.00308300     | 0.00000000     |
| 28                | [Gly]                                               | 0.00000000                 | 0.00583150     | 0.01527950     | 0.04762350       | 0.01335850     | 0.01893100                    | 0.00899100     | 0.00000000     |
| 29                | [GlyA]                                              | 0.00000000                 | 0.00941500     | 0.01411250     | 0.02268300       | 0.01625300     | 0.02614850                    | 0.00154400     | 0.00000000     |
| 30                | [H <sub>2</sub> O]                                  | 0.00000000                 | 0.00579700     | 0.01009300     | 0.00294950       | 0.00466050     | 0.00611700                    | 0.00792500     | 0.00000000     |
| 31                | [HexOH]                                             | 0.00000000                 | 0.00412200     | 0.01027400     | 0.09671050       | 0.02662000     | 0.01401750                    | 0.00866750     | 0.00000000     |
| 32                | [IsoOH]                                             | 0.00000000                 | 0.00141350     | 0.00509000     | 0.05485800       | 0.02434450     | 0.00678600                    | 0.00434350     | 0.00000000     |
| 33                | [LacA]                                              | 0.00000000                 | 0.00685300     | 0.00907200     | 0.04270000       | 0.02228200     | 0.02212600                    | 0.00215150     | 0.00000000     |
| 34                | [LevA]                                              | 0.00000000                 | 0.00577200     | 0.00926850     | 0.06684000       | 0.01820900     | 0.03365050                    | 0.00025900     | 0.00000000     |
| 35                | [Mal]                                               | 0.00000000                 | 0.01642850     | 0.04099350     | 0.09314550       | 0.04189150     | 0.06346700                    | 0.00960300     | 0.00000000     |
| 36                | [MalA]                                              | 0.00000000                 | 0.01236900     | 0.01817900     | 0.02697950       | 0.02195200     | 0.03772950                    | 0.00000000     | 0.00000000     |
| 37                | [ManA]                                              | 0.00000000                 | 0.00730300     | 0.01286750     | 0.05506150       | 0.06042150     | 0.02117900                    | 0.00100800     | 0.00000000     |
| 38                | [Mat]                                               | 0.00000000                 | 0.00000000     | 0.00002300     | 0.16903500       | 0.04024150     | 0.01078950                    | 0.00691550     | 0.00000000     |
| 39                | [MDEA]                                              | 0.00000000                 | 0.00541500     | 0.01006300     | 0.08353700       | 0.02546900     | 0.01518100                    | 0.00967050     | 0.00000000     |
| 40                | [MEA]                                               | 0.00000000                 | 0.00285700     | 0.01638500     | 0.04088750       | 0.01388450     | 0.00954500                    | 0.00779300     | 0.00108800     |
| 41                | [Men]                                               | 0.00000000                 | 0.00126300     | 0.00457750     | 0.11484350       | 0.05676200     | 0.00643800                    | 0.00338000     | 0.00000000     |
| 42                | [Met]                                               | 0.00000000                 | 0.00577750     | 0.01825100     | 0.07276850       | 0.03241550     | 0.02618350                    | 0.00467350     | 0.00047600     |
| 43                | [Nin]                                               | 0.00000000                 | 0.00775450     | 0.02281850     | 0.05941850       | 0.03076400     | 0.04110400                    | 0.00000000     | 0.00000000     |
| 44                | [NMA]                                               | 0.00000000                 | 0.00132600     | 0.00690950     | 0.05907500       | 0.01606500     | 0.00997800                    | 0.00535600     | 0.00000000     |
| 45                | [OA]                                                | 0.00000050                 | 0.01493250     | 0.00859350     | 0.01851450       | 0.02104500     | 0.03288300                    | 0.00000000     | 0.00000000     |
| 46                | [OcA]                                               | 0.00000000                 | 0.00563400     | 0.00432650     | 0.10955700       | 0.04834700     | 0.02034000                    | 0.00004350     | 0.00000900     |
| 47                | [PA]                                                | 0.00000000                 | 0.00564600     | 0.00447150     | 0.05075850       | 0.01940400     | 0.02022250                    | 0.00006250     | 0.00000000     |

|    |                      |            |            |            |            |            |            |            |            |
|----|----------------------|------------|------------|------------|------------|------------|------------|------------|------------|
| 48 | [PAA]                | 0.00000000 | 0.00581150 | 0.00953000 | 0.06493150 | 0.05476350 | 0.02000100 | 0.00005400 | 0.00000000 |
| 49 | [Pae]                | 0.00000000 | 0.00000000 | 0.01251250 | 0.08094650 | 0.05164200 | 0.02228650 | 0.00018900 | 0.00000000 |
| 50 | [PDA]                | 0.00000000 | 0.00000000 | 0.01945000 | 0.06061850 | 0.01719950 | 0.00551850 | 0.00779350 | 0.00257400 |
| 51 | [PEG200]             | 0.00000000 | 0.00679500 | 0.00988500 | 0.15010450 | 0.02496250 | 0.03850600 | 0.00662000 | 0.00000000 |
| 52 | [PEG400]             | 0.00000000 | 0.00589050 | 0.01031500 | 0.35047800 | 0.03394300 | 0.05653450 | 0.02501850 | 0.00000000 |
| 53 | [PenOH]              | 0.00000000 | 0.00419300 | 0.01036350 | 0.08383450 | 0.02241400 | 0.01378150 | 0.00844500 | 0.00000000 |
| 54 | [Ph]                 | 0.00000000 | 0.00586000 | 0.00605250 | 0.04226900 | 0.05369550 | 0.00899350 | 0.00000500 | 0.00000000 |
| 55 | [TEA]                | 0.00000000 | 0.00828700 | 0.01500300 | 0.08936250 | 0.02804950 | 0.02101000 | 0.01136050 | 0.00003200 |
| 56 | [TEG]                | 0.00000000 | 0.00628550 | 0.01005400 | 0.11197150 | 0.02156650 | 0.03007300 | 0.00643550 | 0.00000000 |
| 57 | [TFA]                | 0.00000000 | 0.00842550 | 0.00862400 | 0.02055100 | 0.04837650 | 0.01584200 | 0.00000300 | 0.00000000 |
| 58 | [ThU]                | 0.00000000 | 0.01115500 | 0.01846200 | 0.00745900 | 0.02674600 | 0.02795800 | 0.00008300 | 0.00000000 |
| 59 | [Thy]                | 0.00000000 | 0.00679500 | 0.00988500 | 0.15010450 | 0.02496250 | 0.03850600 | 0.00662000 | 0.00000000 |
| 60 | [TMG]                | 0.00000000 | 0.00389300 | 0.00571850 | 0.09384000 | 0.01612200 | 0.02146200 | 0.00483700 | 0.00000000 |
| 61 | [U]                  | 0.00000000 | 0.00402400 | 0.02415850 | 0.00957800 | 0.01569300 | 0.01642100 | 0.00690050 | 0.00000000 |
| 62 | [Xyl]                | 0.00000000 | 0.01013300 | 0.02129050 | 0.06106550 | 0.01977100 | 0.03008800 | 0.00894650 | 0.00000000 |
| 63 | [ZnCl <sub>2</sub> ] | 0.00041750 | 0.00000000 | 0.00920550 | 0.00005450 | 0.04529200 | 0.01611400 | 0.00000000 | 0.00000000 |



**Table S.4.** The ANN weights and biases for the links between the neurons in the first hidden layer, the second hidden layer, and the output layer.

| <b>Hidden Layer 1</b>                                                                                                                                                                                                                                                                                                                                                                                                                       |                       |                       |                       |                       |                       |                       |                       |                       |                       |                        |                        |                        |                        |                        |                        |
|---------------------------------------------------------------------------------------------------------------------------------------------------------------------------------------------------------------------------------------------------------------------------------------------------------------------------------------------------------------------------------------------------------------------------------------------|-----------------------|-----------------------|-----------------------|-----------------------|-----------------------|-----------------------|-----------------------|-----------------------|-----------------------|------------------------|------------------------|------------------------|------------------------|------------------------|------------------------|
|                                                                                                                                                                                                                                                                                                                                                                                                                                             | <b>H<sub>1</sub></b>  | <b>H<sub>2</sub></b>  | <b>H<sub>3</sub></b>  | <b>H<sub>4</sub></b>  | <b>H<sub>5</sub></b>  | <b>H<sub>6</sub></b>  | <b>H<sub>7</sub></b>  | <b>H<sub>8</sub></b>  | <b>H<sub>9</sub></b>  | <b>H<sub>10</sub></b>  | <b>H<sub>11</sub></b>  | <b>H<sub>12</sub></b>  | <b>H<sub>13</sub></b>  | <b>H<sub>14</sub></b>  | <b>H<sub>15</sub></b>  |
| <b>S<sub>1</sub></b>                                                                                                                                                                                                                                                                                                                                                                                                                        | -1.1338E+07           | 2.5537E+05            | 1.5268E+05            | -1.5752E+05           | 1.1110E+05            | -5.3650E+04           | 2.3958E+04            | -7.4043E+05           | -1.0760E+06           | 3.4415E+05             | 3.3179E+05             | -7.4494E+04            | -4.5714E+05            | 4.9243E+05             | 2.1793E+05             |
| <b>S<sub>2</sub></b>                                                                                                                                                                                                                                                                                                                                                                                                                        | 2.5539E+03            | 2.7244E+03            | 1.6891E+03            | 2.0500E+03            | 1.3111E+03            | 1.5133E+03            | -2.9408E+03           | -5.4452E+02           | 1.1885E+03            | 1.0748E+03             | -1.4528E+03            | -1.5350E+03            | -7.4030E+02            | 1.7345E+02             | -1.1218E+03            |
| <b>S<sub>3</sub></b>                                                                                                                                                                                                                                                                                                                                                                                                                        | -5.8352E+02           | -2.1204E+01           | 1.0027E+03            | -7.8411E+02           | 1.5372E+02            | 2.1926E+02            | 5.3110E+02            | -4.8448E+01           | -2.4045E+02           | 3.5855E+02             | 8.4983E+02             | -4.7754E+01            | 3.3401E+02             | 5.5894E+02             | -1.0463E+03            |
| <b>S<sub>4</sub></b>                                                                                                                                                                                                                                                                                                                                                                                                                        | -2.6164               | 1.6981E+02            | 2.7476E+02            | 7.9128E+01            | 7.8042E+01            | 1.4229E+02            | 2.4452E+02            | -9.0100E+01           | -4.9601E+01           | 1.6742E+02             | 5.7721E+01             | -1.8608E+02            | -8.1405E+01            | -8.3877E+01            | -1.3605E+02            |
| <b>S<sub>5</sub></b>                                                                                                                                                                                                                                                                                                                                                                                                                        | -1.7546E+01           | -4.4422E+02           | -1.0034E+03           | 2.5088E+02            | 1.4271E+02            | 8.7078E+01            | -6.5890E+02           | 1.3188E+02            | 1.4767E+02            | -1.0880E+02            | 7.7643E+01             | 2.7382E+02             | 3.5472E+02             | -1.4309E+01            | -4.1306E+02            |
| <b>S<sub>6</sub></b>                                                                                                                                                                                                                                                                                                                                                                                                                        | 1.9837E+02            | -8.9084E+02           | -1.2609E+03           | 6.4288E+02            | -2.4934E+02           | -9.4112E+02           | -1.9200E+02           | 4.1454E+02            | -1.2213E+02           | -4.7452E+02            | 2.5834E+02             | 6.5806E+02             | 2.2874E+02             | -3.1372E+02            | 5.2549E+02             |
| <b>S<sub>7</sub></b>                                                                                                                                                                                                                                                                                                                                                                                                                        | -5.0265E+01           | -5.8379E+02           | -6.5291E+02           | 5.2969E+02            | 4.8461E+02            | -3.1180E+02           | -1.0389E+03           | 2.6622E+01            | 7.6455E+02            | -6.1054E+02            | -4.4734E+02            | 5.5320E+02             | -4.2920E+02            | -4.8944E+02            | 9.9763E+02             |
| <b>S<sub>8</sub></b>                                                                                                                                                                                                                                                                                                                                                                                                                        | 7.6508E+03            | -1.2961E+04           | 4.0532E+04            | -1.5900E+04           | -2.3106E+04           | -1.3478E+04           | -6.6855E+03           | -1.2617E+02           | -1.7271E+03           | 7.5078E+03             | -3.0060E+03            | 9.7037E+03             | 1.0416E+04             | -9.6832E+03            | 1.4982E+04             |
| <b>T</b>                                                                                                                                                                                                                                                                                                                                                                                                                                    | 1.1749E-02            | -4.7587E-03           | -9.0458E-02           | -2.7099E-02           | -5.7218E-02           | 2.3226E-02            | 3.4020E-02            | 8.9643E-03            | -2.0043E-02           | 7.5099E-02             | 6.3015E-03             | -1.4850E-02            | -1.3366E-03            | 5.9303E-03             | -8.3494E-02            |
| <b>b</b>                                                                                                                                                                                                                                                                                                                                                                                                                                    | -1.7677               | 8.7305                | 2.8979E+01            | -1.2586E+01           | -2.1466               | -8.5229               | 8.0392                | -2.4141               | -2.2936               | -3.1102E+01            | -1.5919E+01            | 7.3535                 | -4.4442                | 3.7003                 | 4.5017E+01             |
| <b>Hidden Layer 2</b>                                                                                                                                                                                                                                                                                                                                                                                                                       |                       |                       |                       |                       |                       |                       |                       |                       |                       |                        |                        |                        |                        |                        |                        |
|                                                                                                                                                                                                                                                                                                                                                                                                                                             | <b>HH<sub>1</sub></b> | <b>HH<sub>2</sub></b> | <b>HH<sub>3</sub></b> | <b>HH<sub>4</sub></b> | <b>HH<sub>5</sub></b> | <b>HH<sub>6</sub></b> | <b>HH<sub>7</sub></b> | <b>HH<sub>8</sub></b> | <b>HH<sub>9</sub></b> | <b>HH<sub>10</sub></b> | <b>HH<sub>11</sub></b> | <b>HH<sub>12</sub></b> | <b>HH<sub>13</sub></b> | <b>HH<sub>14</sub></b> | <b>HH<sub>15</sub></b> |
| <b>H<sub>1</sub></b>                                                                                                                                                                                                                                                                                                                                                                                                                        | 9.3615                | 2.0907                | 5.7445                | -5.1926               | 1.1028E+01            | -1.1008E+01           | -4.2602               | -5.9954E-01           | 1.9382E+01            | 1.3568E+01             | -1.2870E+01            | 2.3549E+01             | 2.3383                 | -3.5294                | 5.8347E-01             |
| <b>H<sub>2</sub></b>                                                                                                                                                                                                                                                                                                                                                                                                                        | 9.7510                | 4.7245                | 7.0257                | -4.7253               | 5.2891E-01            | 2.3745E+01            | -6.7923               | -4.4519               | -1.2834E+01           | 6.7219                 | 1.5576E+01             | 4.0044                 | 1.5906                 | -6.5892                | 4.0962                 |
| <b>H<sub>3</sub></b>                                                                                                                                                                                                                                                                                                                                                                                                                        | -2.4007               | 6.9744                | -2.3492               | -1.2150               | -3.9224               | -7.6372               | 7.6628E-02            | 2.7125                | -1.4615E+01           | 7.4044E-02             | 5.5426E-01             | -5.3861                | 8.4748E-04             | 9.9733                 | -1.5045E+01            |
| <b>H<sub>4</sub></b>                                                                                                                                                                                                                                                                                                                                                                                                                        | 9.2003                | -6.0639               | 5.0720                | 5.6403                | 1.0529E+01            | 3.1777E-01            | -8.1566E-01           | -1.4900               | -7.4514E-01           | 5.7231                 | 5.7503E-01             | -6.3966                | 3.1331                 | 5.3904                 | 2.2312                 |
| <b>H<sub>5</sub></b>                                                                                                                                                                                                                                                                                                                                                                                                                        | 8.4947E-01            | 1.0379E+01            | -6.0875               | -1.8730               | -4.8677               | 1.5824E-01            | -1.2687E+01           | 3.7073                | -1.1766E+01           | 3.4810                 | 7.6112                 | -1.8922                | -4.9164                | -3.3460                | -3.9332                |
| <b>H<sub>6</sub></b>                                                                                                                                                                                                                                                                                                                                                                                                                        | 2.5244                | 8.1860                | -1.2713E+01           | -4.0965               | 1.6909                | -1.1150E+01           | 1.1961E+01            | -7.8119E-01           | 1.0803E+01            | 1.3459E+01             | -1.1952E+01            | -1.2759E+01            | -6.2999                | -1.1364E+01            | 1.0457E+01             |
| <b>H<sub>7</sub></b>                                                                                                                                                                                                                                                                                                                                                                                                                        | -3.4585               | 5.3230                | 3.5498                | -6.3843               | -5.7126               | -1.7169E+01           | -3.0963               | -2.2595               | -1.2444E+01           | -1.6521                | 9.1697                 | 2.0774E+01             | 1.6347E-01             | -7.1704                | -1.4631E+01            |
| <b>H<sub>8</sub></b>                                                                                                                                                                                                                                                                                                                                                                                                                        | 3.5220                | 1.9037E+01            | 1.6138E+01            | 7.6257                | 1.2194E+01            | -2.5549               | 3.1557                | 1.5641                | 9.9762                | -3.0108                | 1.8631E+01             | 1.1985E+01             | -1.8116E+01            | -8.7356E-01            | 8.2572                 |
| <b>H<sub>9</sub></b>                                                                                                                                                                                                                                                                                                                                                                                                                        | -3.3919               | -3.6944               | 4.9785                | -1.5414               | -4.2505               | -2.3544E+01           | 9.4960                | -1.6682               | 1.5539E+01            | -7.9533                | 1.1325E+01             | -5.5481                | -6.6517                | -1.5773E+01            | -2.0009E+01            |
| <b>H<sub>10</sub></b>                                                                                                                                                                                                                                                                                                                                                                                                                       | -5.1778               | 7.5022                | -6.7599               | -5.9923               | 4.3140E-01            | 1.1881E+01            | 7.9026E-01            | -6.4471               | -9.5937               | 4.7544                 | 3.4263                 | 7.8940                 | 7.4421                 | -2.5861                | -4.8956                |
| <b>H<sub>11</sub></b>                                                                                                                                                                                                                                                                                                                                                                                                                       | 4.4638                | 2.0964                | 4.9560                | -1.1865E+01           | 1.5812E+01            | 9.1558                | 7.0146                | -2.5918               | -1.1016E+01           | 2.8364                 | 3.1024E-01             | 3.9602                 | 8.5348E-01             | -1.3462E+01            | 1.3896E+01             |
| <b>H<sub>12</sub></b>                                                                                                                                                                                                                                                                                                                                                                                                                       | 1.6637                | -6.9085               | -7.5047               | -3.6999               | 2.4812                | 2.5035E+01            | -5.7688               | 4.0252E-01            | 1.3675E+01            | 4.7700                 | 1.5630                 | -9.0550E-01            | 1.4629E+01             | -1.9786                | 3.5421                 |
| <b>H<sub>13</sub></b>                                                                                                                                                                                                                                                                                                                                                                                                                       | -6.7184               | -5.6508               | -9.6076               | -4.0765               | -4.9834               | 1.0533                | -2.4158               | -1.1629               | 4.8858                | -6.8037                | -6.6969                | -2.2186                | 4.1965                 | -1.7959E+01            | 8.9399                 |
| <b>H<sub>14</sub></b>                                                                                                                                                                                                                                                                                                                                                                                                                       | 1.1388E+01            | -7.3040               | 1.8608E+01            | -2.8694               | 3.3874                | 5.8613                | -9.2730               | -5.9256               | 5.3312                | -9.8300                | 1.9037                 | 6.0406                 | 9.6680                 | 5.8475                 | -8.5408                |
| <b>H<sub>15</sub></b>                                                                                                                                                                                                                                                                                                                                                                                                                       | -2.8514               | 7.5118                | -3.9763               | -4.6657               | 1.2262                | -1.4289               | 3.6736E-02            | 5.7000E-01            | 9.9911E-01            | -9.8896                | 5.0148                 | 1.3662E+01             | -2.6374E-01            | -9.7774                | 1.6352E+01             |
| <b>b</b>                                                                                                                                                                                                                                                                                                                                                                                                                                    | -1.6091E+01           | 1.2024E+01            | -4.3086               | -2.6235               | -2.8045               | -2.8348               | -5.3121               | -1.8604               | 1.2489E+01            | 9.5826                 | -5.9989                | -9.1208                | -2.6332                | -5.1608                | 4.3003                 |
| <b>Output Layer</b>                                                                                                                                                                                                                                                                                                                                                                                                                         |                       |                       |                       |                       |                       |                       |                       |                       |                       |                        |                        |                        |                        |                        |                        |
| $\gamma = 7.9345808213937(HH_1) + -8.00861024816186(HH_2) + -12.6648569326264(HH_3) + -6.94468978918628(HH_4) + 6.15125194731144(HH_5) + 8.11783296550118(HH_6) + -7.64148667140172(HH_7) + 5.57968496579204(HH_8) + -5.17501462938388(HH_9) + -2.73880764533567(HH_{10}) + 5.24546261065313(HH_{11}) + -5.78243703304079(HH_{12}) + 7.63993164319241(HH_{13}) + 11.3981379655912(HH_{14}) + -4.70937748282011(HH_{15}) + 53.7121092343073$ |                       |                       |                       |                       |                       |                       |                       |                       |                       |                        |                        |                        |                        |                        |                        |

## References

- (1) Abbott, A. P.; Capper, G.; Gray, S. Design of Improved Deep Eutectic Solvents Using Hole Theory. *ChemPhysChem* **2006**, *7* (4), 803–806. <https://doi.org/10.1002/cphc.200500489>.
- (2) Ghaedi, H.; Ayoub, M.; Sufian, S.; Shariff, A. M.; Lal, B. The Study on Temperature Dependence of Viscosity and Surface Tension of Several Phosphonium-Based Deep Eutectic Solvents. *J. Mol. Liq.* **2017**. <https://doi.org/10.1016/j.molliq.2017.06.024>.
- (3) Ghaedi, H.; Zhao, M.; Clough, P. T.; Anthony, E. J.; Fennell, P. S. High CO<sub>2</sub> Absorption in New Amine Based-Transition-Temperature Mixtures (Deep Eutectic Analogues) and Reporting Thermal Stability, Viscosity and Surface Tension: Response Surface Methodology (RSM). *J. Mol. Liq.* **2020**, *316*. <https://doi.org/10.1016/j.molliq.2020.113863>.
- (4) Chen, Z.; Ludwig, M.; Warr, G. G.; Atkin, R. Effect of Cation Alkyl Chain Length on Surface Forces and Physical Properties in Deep Eutectic Solvents. *J. Colloid Interface Sci.* **2017**, *494*, 373–379. <https://doi.org/10.1016/j.jcis.2017.01.109>.
- (5) Ibrahim, R. K.; Hayyan, M.; Alsaadi, M. A.; Ibrahim, S.; Hayyan, A.; Hashim, M. A. Diethylene Glycol Based Deep Eutectic Solvents and Their Physical Properties. *Stud. Univ. Babes-Bolyai Chem.* **2017**, *62* (4), 433–450. <https://doi.org/10.24193/subbchem.2017.4.37>.
- (6) Ibrahim, R. K.; Hayyan, M.; AlSaadi, M. A.; Ibrahim, S.; Hayyan, A.; Hashim, M. A. Physical Properties of Ethylene Glycol-Based Deep Eutectic Solvents. *J. Mol. Liq.* **2019**, *276*, 794–800. <https://doi.org/10.1016/j.molliq.2018.12.032>.
- (7) Christopher, R.; Mchem, H. Physical Properties of Alcohol Based Deep Eutectic Solvents, 2008.
- (8) Omar, K. A.; Sadeghi, R. Novel Benzoic Acid-Based Deep-Eutectic-Solvents: Preparation and Physicochemical Properties Determination. *Fluid Phase Equilib.* **2020**, *522*, 112752. <https://doi.org/10.1016/j.fluid.2020.112752>.
- (9) Chanioti, S.; Tzia, C. Extraction of Phenolic Compounds from Olive Pomace by Using Natural Deep Eutectic Solvents and Innovative Extraction Techniques. *Innov. Food Sci. Emerg. Technol.* **2018**, *48*, 228–239. <https://doi.org/10.1016/j.ifset.2018.07.001>.
- (10) López, N.; Delso, I.; Matute, D.; Lafuente, C.; Artal, M. Characterization of Xylitol or Citric Acid:Choline Chloride:Water Mixtures: Structure, Thermophysical Properties, and Quercetin Solubility. *Food Chem.* **2020**, *306* (June 2019). <https://doi.org/10.1016/j.foodchem.2019.125610>.
- (11) Chanioti, S.; Paraskevi, Siamandoura Constantina, T. Application of Natural Deep Eutectic Solvents for Extraction of Polyphenolics from Olive Oil By-Products Using Microwaves. **2016**.
- (12) Omar, K. A.; Sadeghi, R. Novel Diglycolic Acid-Based Deep Eutectic Solvents and Their Applications as a Rust Remover. *J. Mol. Liq.* **2020**, *312*, 113380. <https://doi.org/10.1016/j.molliq.2020.113380>.
- (13) Lapeña, D.; Lomba, L.; Artal, M.; Lafuente, C.; Giner, B. Thermophysical Characterization of the Deep Eutectic Solvent Choline Chloride:Ethylene Glycol and One of Its Mixtures with Water. *Fluid Phase Equilib.* **2019**, *492*, 1–9. <https://doi.org/10.1016/j.fluid.2019.03.018>.
- (14) Klein, J. M.; Squire, H.; Dean, W.; Gurkan, B. E. From Salt in Solution to Solely Ions: Solvation of Methyl Viologen in Deep Eutectic Solvents and Ionic Liquids. *J. Phys. Chem. B* **2020**, *124* (29), 6348–6357. <https://doi.org/10.1021/acs.jpcc.0c03296>.
- (15) Hayyan, A.; Mjalli, F. S.; Alnashef, I. M.; Al-Wahaibi, T.; Al-Wahaibi, Y. M.; Hashim, M. A. Fruit Sugar-Based Deep Eutectic Solvents and Their Physical Properties. *Thermochim. Acta* **2012**, *541*, 70–75. <https://doi.org/10.1016/j.tca.2012.04.030>.
- (16) Bergua, F.; Delso, I.; Muñoz-Embid, J.; Lafuente, C.; Artal, M. Structure and Properties of Two Glucose-Based Deep Eutectic Systems. *Food Chem.* **2021**, *336*. <https://doi.org/10.1016/j.foodchem.2020.127717>.
- (17) Hayyan, A.; Mjalli, F. S.; Alnashef, I. M.; Al-Wahaibi, Y. M.; Al-Wahaibi, T.; Hashim, M. A. Glucose-Based Deep Eutectic Solvents: Physical Properties. *J. Mol. Liq.* **2013**, *178*, 137–141. <https://doi.org/10.1016/j.molliq.2012.11.025>.
- (18) Mjalli, F. S.; Vakili-Nezhaad, G.; Shahbaz, K.; Alnashef, I. M. Application of the Eötvös and Guggenheim Empirical Rules for Predicting the Density and Surface Tension of Ionic Liquids Analogues. *Thermochim. Acta* **2014**, *575*, 40–44. <https://doi.org/10.1016/j.tca.2013.10.017>.
- (19) Mjalli, F. S.; Jabbar, N. M. A. Acoustic Investigation of Choline Chloride Based Ionic Liquids Analogs. *Fluid Phase Equilib.* **2014**, *381*, 71–76. <https://doi.org/10.1016/j.fluid.2014.08.017>.
- (20) Francisco, M.; van den Bruinhorst, A.; Zubeir, L. F.; Peters, C. J.; Kroon, M. C. A New Low Transition Temperature Mixture (LTTM) Formed by Choline Chloride+lactic Acid: Characterization as Solvent for CO<sub>2</sub> Capture. *Fluid Phase Equilib.* **2013**, *340*, 77–84. <https://doi.org/10.1016/j.fluid.2012.12.001>.
- (21) Gajardo-parra, N. F.; Lubben, M. J.; Winnert, J. M.; Leiva, Á.; Brennecke, J. F.; Canales, R. I. Physicochemical Properties of Choline Chloride-Based Deep Eutectic Solvents and Excess Properties of Their Pseudo-Binary Mixtures With. *Thermodyn. J Chem* **2019**, *133*, 272–284. <https://doi.org/10.1016/j.jct.2019.02.010>.
- (22) Sanchez-Fernandez, A.; Hammond, O. S.; Jackson, A. J.; Arnold, T.; Douth, J.; Edler, K. J. Surfactant-Solvent Interaction Effects on the Micellization of Cationic Surfactants in a Carboxylic Acid-Based Deep Eutectic Solvent. *Langmuir* **2017**, *33* (50), 14304–14314. <https://doi.org/10.1021/acs.langmuir.7b03254>.
- (23) D’Agostino, C.; Harris, R. C.; Abbott, A. P.; Gladden, L. F.; Mantle, M. D. Molecular Motion and Ion Diffusion in Choline Chloride Based Deep Eutectic Solvents Studied by <sup>1</sup>H Pulsed Field Gradient NMR Spectroscopy. *Phys. Chem. Chem. Phys.* **2011**, *13* (48), 21383–21391. <https://doi.org/10.1039/C1CP22554E>.
- (24) Mjalli, F. S.; Murshid, G.; Al-Zakwani, S.; Hayyan, A. Monoethanolamine-Based Deep Eutectic Solvents, Their Synthesis and Characterization. *Fluid Phase Equilib.* **2017**, *448*, 30–40. <https://doi.org/10.1016/j.fluid.2017.03.008>.
- (25) Omar, K. A.; Sadeghi, R. Novel Ninhydrin-Based Deep Eutectic Solvents for Amino Acid Detection. *J. Mol. Liq.* **2020**, *303*, 112644. <https://doi.org/https://doi.org/10.1016/j.molliq.2020.112644>.

- (26) Abbott, A. P.; Al-Murshedi, A. Y. M.; Alshammari, O. A. O.; Harris, R. C.; Kareem, J. H.; Qader, I. B.; Ryder, K. Thermodynamics of Phase Transfer for Polar Molecules from Alkanes to Deep Eutectic Solvents. *Fluid Phase Equilib.* **2017**, *448*, 99–104. <https://doi.org/10.1016/j.fluid.2017.05.008>.
- (27) Abbott, A. P.; Ahmed, E. I.; Harris, R. C.; Ryder, K. S. Evaluating Water Miscible Deep Eutectic Solvents (DESs) and Ionic Liquids as Potential Lubricants. *Green Chem.* **2014**, *16* (9), 4156–4161. <https://doi.org/10.1039/c4gc00952e>.
- (28) Abbott, A. P.; Boothby, D.; Capper, G.; Davies, D. L.; Rasheed, R. K. Deep Eutectic Solvents Formed between Choline Chloride and Carboxylic Acids: Versatile Alternatives to Ionic Liquids. *J. Am. Chem. Soc.* **2004**, *126* (29), 9142–9147. <https://doi.org/10.1021/ja048266j>.
- (29) Chen, Y.; Fu, L.; Liu, Z.; Dai, F.; Dong, Z.; Li, D.; Liu, H.; Zhao, D.; Lou, Y. Surface Tension and Surface Thermodynamic Properties of PEG-Based Deep Eutectic Solvents. *J. Mol. Liq.* **2020**, *318*, 1–9. <https://doi.org/10.1016/j.molliq.2020.114042>.
- (30) Hayyan, A.; Hadj-Kali, M. K.; Salleh, M. Z. M.; Hashim, M. A.; Rubaidi, S. R.; Hayyan, M.; Zulkifli, M. Y.; Rashid, S. N.; Mirghani, M. E. S.; Ali, E.; Basirun, W. J. Characterization of Tetraethylene Glycol-Based Deep Eutectic Solvents and Their Potential Application for Dissolving Unsaturated Fatty Acids. *J. Mol. Liq.* **2020**, *312*. <https://doi.org/10.1016/j.molliq.2020.113284>.
- (31) Ji, X.; Xie, Y.; Zhang, Y.; Lu, X. CO<sub>2</sub> Capture/Separation Using Choline Chloride-Based Ionic Liquids. *13th Int. Conf. Prop. Phase Equilibria Prod. Process Des.* **2013**, No. May, 1–13.
- (32) Doherty, B.; Acevedo, O. B.: Liquids, Chemical and Dynamical Processes in Solution, Spectroscopy in Solution OPLS Force Field for Choline Chloride-Based Deep Eutectic Solvents OPLS Force Field for Choline Chloride-Based Deep Eutectic Solvents Brian Doherty and Orlando Acevedo \*. **2018**. <https://doi.org/10.1021/acs.jpcc.8b06647>.
- (33) Shahbaz, K.; Mjalli, F. S.; Hashim, M. A.; AlNashef, I. M. Prediction of the Surface Tension of Deep Eutectic Solvents. *Fluid Phase Equilib.* **2012**, *319*, 48–54. <https://doi.org/10.1016/j.fluid.2012.01.025>.
- (34) Li, J. J.; Xiao, H.; Tang, X. D.; Zhou, M. Green Carboxylic Acid-Based Deep Eutectic Solvents as Solvents for Extractive Desulfurization. *Energy and Fuels* **2016**, *30* (7), 5411–5418. <https://doi.org/10.1021/acs.energyfuels.6b00471>.
- (35) Mjalli, F. S. Novel Amino Acids Based Ionic Liquids Analogues: Acidic and Basic Amino Acids. *J. Taiwan Inst. Chem. Eng.* **2016**, *61*, 64–74. <https://doi.org/10.1016/j.jtice.2015.12.020>.
- (36) Jibril, B.; Mjalli, F.; Naser, J.; Gano, Z. New Tetrapropylammonium Bromide-Based Deep Eutectic Solvents: Synthesis and Characterizations. *J. Mol. Liq.* **2014**, *199*, 462–469. <https://doi.org/10.1016/j.molliq.2014.08.004>.
- (37) Chen, Y.; Chen, W.; Fu, L.; Yang, Y.; Wang, Y.; Hu, X.; Wang, F.; Mu, T. Surface Tension of 50 Deep Eutectic Solvents: Effect of Hydrogen-Bonding Donors, Hydrogen-Bonding Acceptors, Other Solvents, and Temperature. *Ind. Eng. Chem. Res.* **2019**, *58* (28), 12741–12750. <https://doi.org/10.1021/acs.iecr.9b00867>.
- (38) Wu, J.; Yin, T. Novel Paeonol-Matine Deep Eutectic Solvent: Physicochemical Properties and Cytotoxicity. *J. Mol. Liq.* **2022**, *348* (xxxx), 118068. <https://doi.org/10.1016/j.molliq.2021.118068>.
- (39) Abdallah, M. M.; Müller, S.; Castilla, A. G. de; Gurikov, P.; Matias, A. A.; Bronze, M. do R.; Fernández, N. Physicochemical Characterization and Simulation of the Eutectic Solvent Systems. *Molecules* **2021**, *26* (6), 1801–1816.
- (40) Zeng, C.; Liu, Y.; Ding, Z.; Xia, H.; Guo, S. Physicochemical Properties and Antibacterial Activity of Hydrophobic Deep Eutectic Solvent-in-Water Nanoemulsion. *J. Mol. Liq.* **2021**, *338*, 116950. <https://doi.org/10.1016/j.molliq.2021.116950>.
- (41) Nunes, R. J.; Saramago, B.; Marrucho, I. M. Surface Tension of DI -Menthol:Octanoic Acid Eutectic Mixtures. *J. Chem. Eng. Data* **2019**, *64* (11), 4915–4923. <https://doi.org/10.1021/acs.jced.9b00424>.
- (42) Liu, K.; Li, B.; Zhang, R.; Zhang, Y.; Zhang, J. Density, Viscosity, Surface Tension, Spectroscopic Properties and Computational Chemistry of the 1, 4-Butanediol + 1, 3-Propanediamine-Based Deep Eutectic Solvent. *J. Iran. Chem. Soc.* **2021**, No. 0123456789. <https://doi.org/10.1007/s13738-021-02371-0>.
- (43) Cardellini, F.; Tiecco, M.; Germani, R.; Cardinali, G.; Corte, L.; Roscini, L.; Spredi, N. Novel Zwitterionic Deep Eutectic Solvents from Trimethylglycine and Carboxylic Acids: Characterization of Their Properties and Their Toxicity. *RSC Adv.* **2014**, *4* (99), 55990–56002. <https://doi.org/10.1039/c4ra10628h>.
- (44) Abbott, A. P.; Barron, J. C.; Ryder, K. S.; Wilson, D. Eutectic-Based Ionic Liquids with Metal-Containing Anions and Cations. *Chem. - A Eur. J.* **2007**, *13* (22), 6495–6501. <https://doi.org/10.1002/chem.200601738>.
